# Supplementary material for: Developmental alterations in Huntington's disease neural cells and pharmacological rescue in cells and mice
Source: Springer Nature journal article supplement (doi:10.1038/nn.4532), 2017-03-20
Supplement: 41593_2017_BFnn4532_MOESM444_ESM.pdf [file 41593_2017_BFnn4532_MOESM444_ESM.pdf]

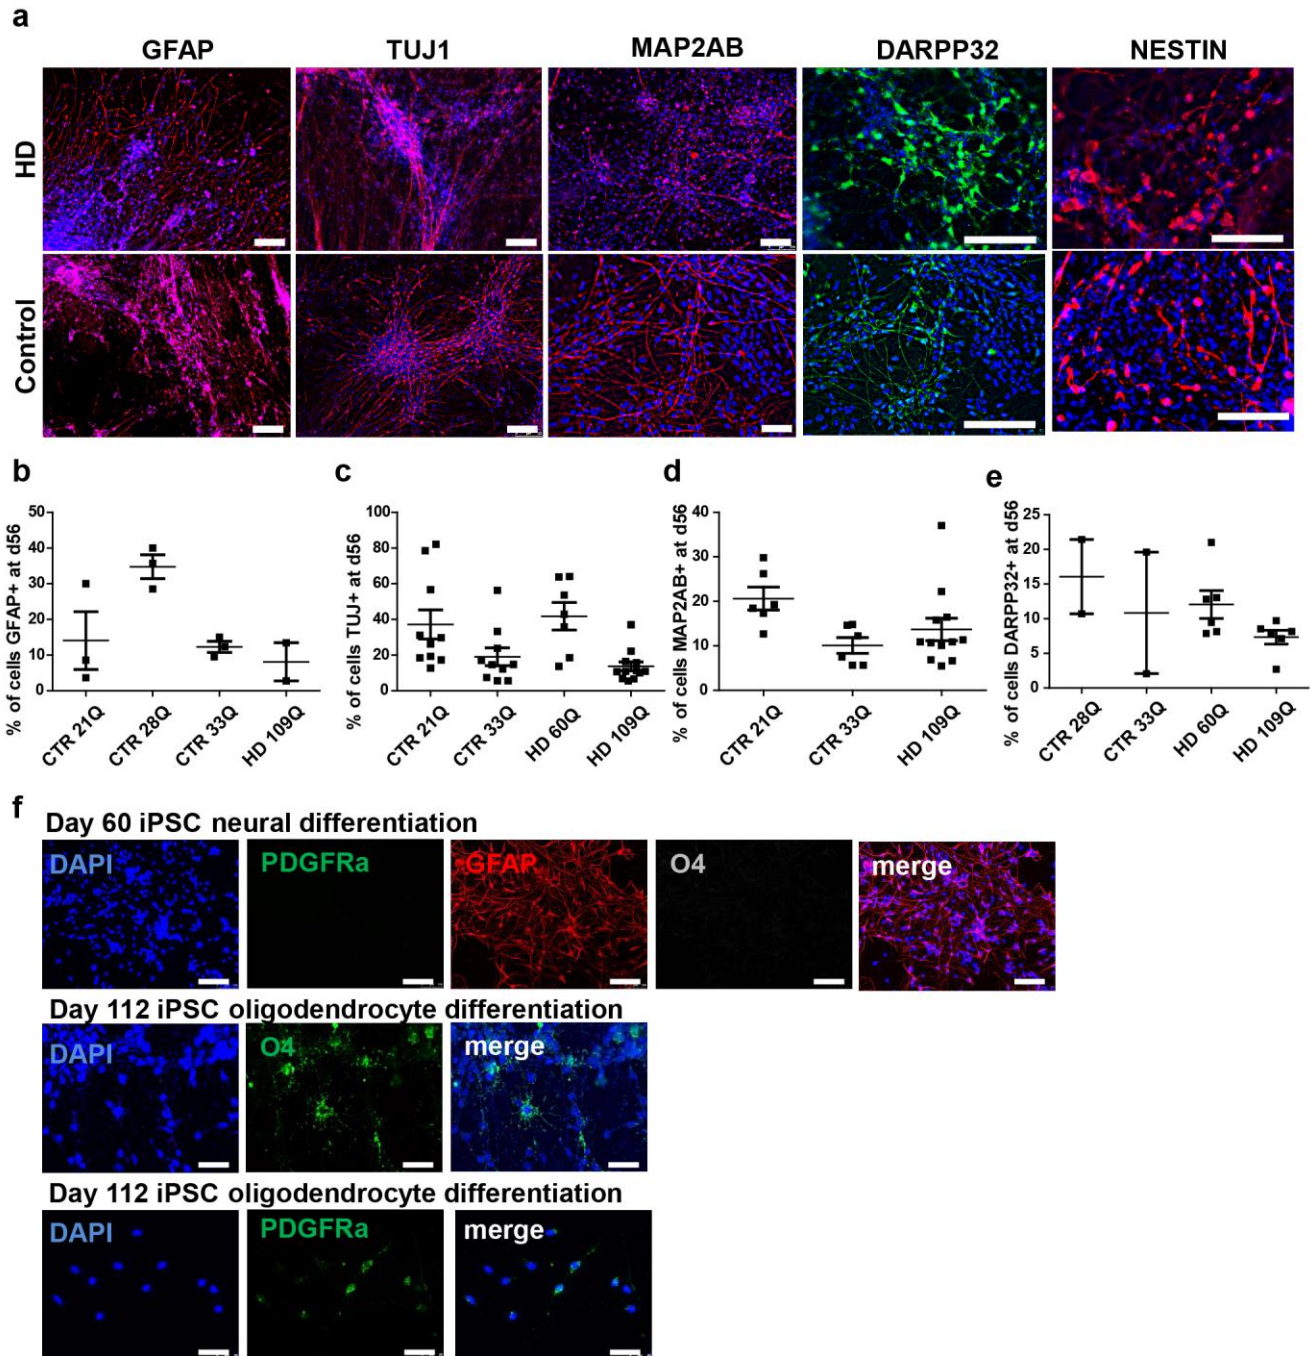

**Supplementary Figure 1**

Staining and quantification of neuronal and oligodendrocyte differentiation markers.

(a) Representative images of immunocytochemistry at day 56 of differentiation demonstrate that both HD (HD109 pictured here) and non-disease (CTR21 pictured here) iPSC lines can generate glial (GFAP) and neuronal (TUJ1, MAP2ab, DARPP32) cells. Scale bar represents 100 μm. (b) Non-biased stereological counts of TUJ1 at day 56 of differentiation indicate that there is no difference in the percent of cells TUJ1-positive between HD and non-disease (CTR). The HD109Q line did have significantly lower TUJ1-positive cells than the CTR21Q and the HD60Q lines (one-way ANOVA, \*  $p < 0.05$ , \*\*  $p < 0.01$ ); however, this reflects line-to-line variability versus a CAG repeat effect. (c) Non-biased stereological counts of MAP2ab at day 56 of differentiation indicate that there is no difference in the percent of cells MAP2ab-positive between HD and non-diseased. (d) Non-biased stereological counts of DARPP32 at day 56 of differentiation indicate that while there is no difference in the percent of DARPP32-positive cells between HD and non-disease. (e) Non-

biased stereological counts of GFAP indicate there is no difference in the percent of cells GFAP-positive between HD and non-diseased. (f) Glial markers PDGFR $\alpha$  and O4 were found to be absent in the iPSC-neural cultures at day 60 of differentiation, whereas at day 112 of oligodendrocyte differentiation from iPSCs, these glial markers were found. Approximately 1000 cells were counted per slide for three independent differentiations.

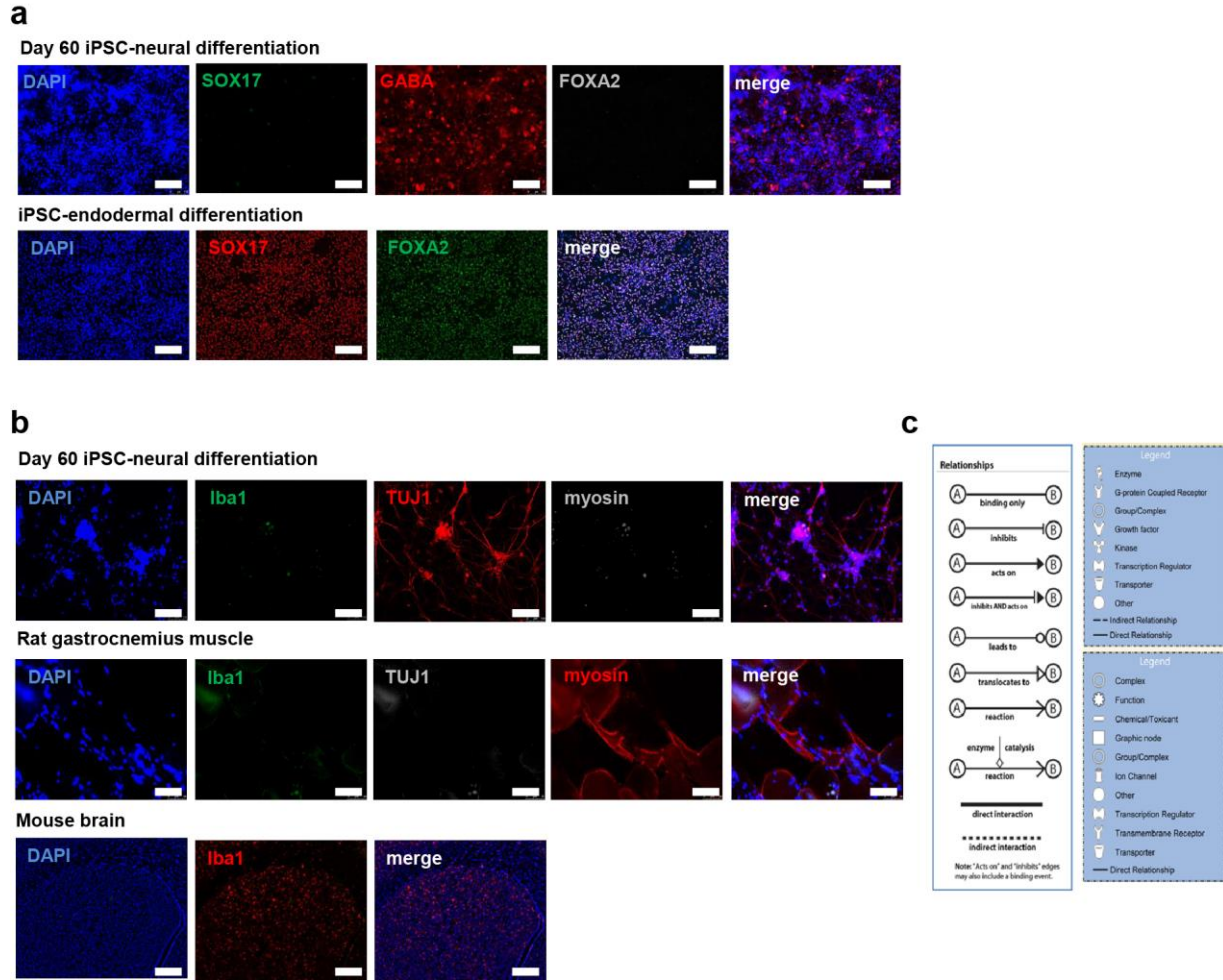

## Supplementary Figure 2

Staining of endoderm, mesoderm and microglial differentiation markers and legend for IPA results.

(a) The endodermal markers SOX17 and FOXA2 were absent in the iPSC-neural cultures (CTR21) at day 60 of differentiation, but they were present in differentiated cultures of iPSC-endoderm (CTR33). (b) The microglial marker Iba1 was absent in day 60 iPSC-neural cultures, but present in wild-type mouse brain sections. Likewise, the mesodermal marker myosin was absent in day 60 iPSC-neural cultures, but present in sections of rat gastrocnemius muscle. (c) IPA gene symbols and relationships. IPA legend for gene networks and relationships/edges.

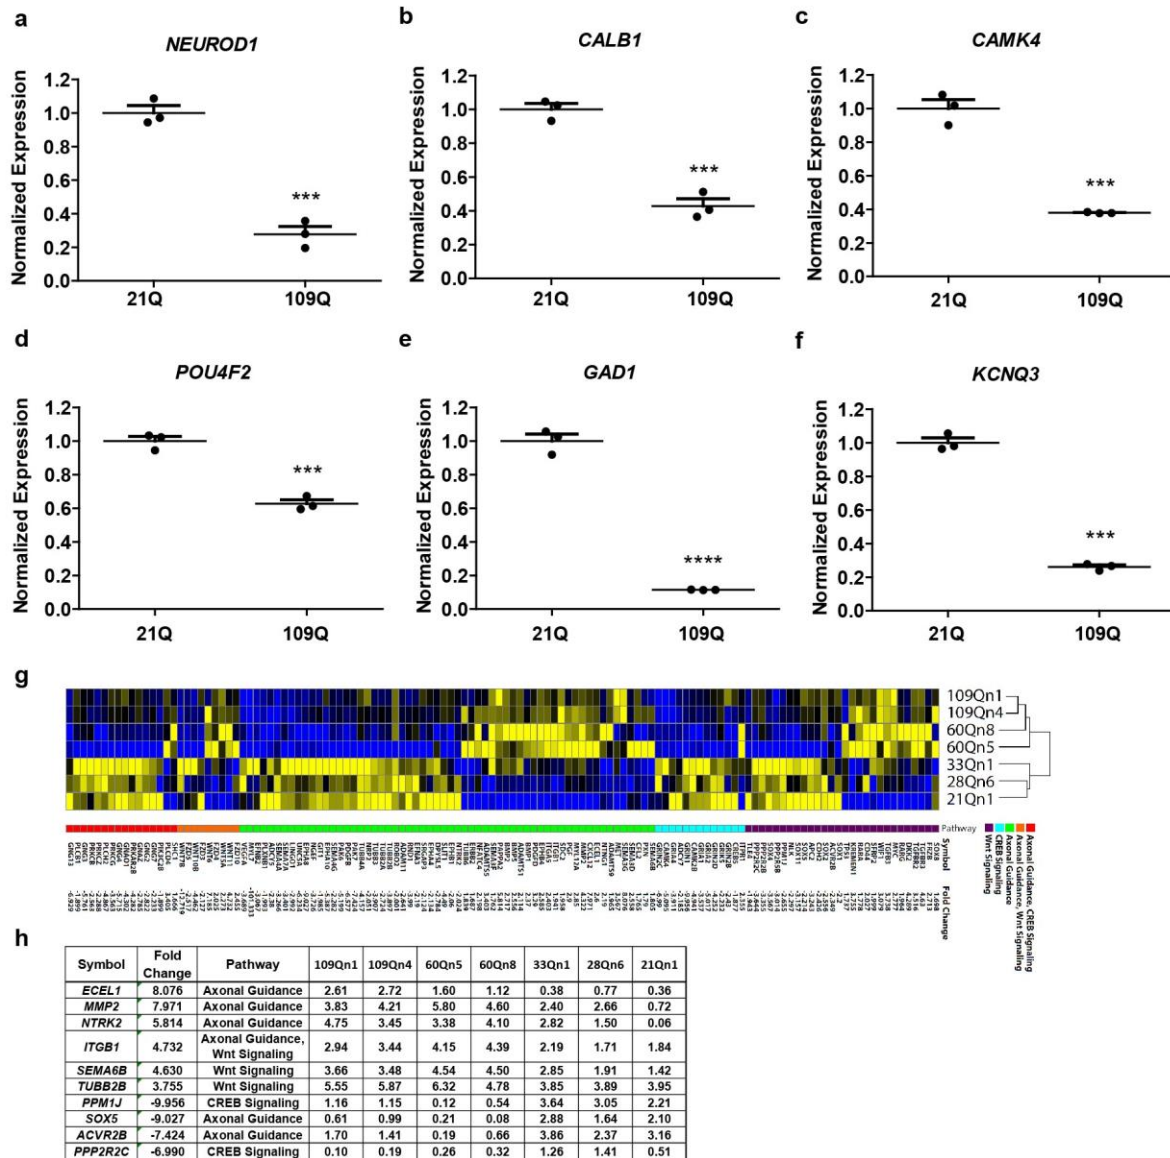

### Supplementary Figure 3

Quantitative PCR supports altered gene expression identified by RNA-seq and hierarchical clustering of genes differentially expressed in several top canonical pathways.

(a-f) New differentiations of representative non-disease (21Q) and HD (109Q) lines were performed and select genes evaluated by RT-qPCR. All exhibited altered expression consistent with that identified by RNA-seq. Two differentiated wells of each line were pooled for RNA extraction and three technical replicates of qPCR performed. A statistical difference in gene expression was determined using an unpaired two-tailed t-test in GraphPad Prism. *NEUROD1*:  $P=0.0003$ ,  $t=11.38$ ,  $df=4$ ; *CALB1*:  $P=0.0005$ ,  $t=10.23$ ,  $df=4$ ; *CAMK4*:  $P=0.0003$ ,  $t=11.72$ ,  $df=4$ ; *POU4F2*:  $P=0.0005$ ,  $t=10.25$ ,  $df=4$ ; *GAD1*:  $P<0.0001$ ,  $t=21.15$ ;  $df=4$ ; *KCNQ3*:  $P<0.0001$ ,  $t=24.22$ ,  $df=4$ . (g) Heat map showing hierarchical clustering of  $\log_2$  transformed gene expression values (RPKMs) of the significantly differentially expressed genes (1869) found in several of the top affected canonical pathways (colors displayed by row min and max values, yellow = higher and blue = lower expression). Genes/rows are sorted by involvement in specific pathways that have been marked by color and shows pathway convergence on key regulator genes found in both axonal guidance and either CREB or WNT signaling. Fold change is shown to the right of the gene symbol and represents the average change of HD/non-disease. A clear pattern of differential gene expression in each pathway provides an indication of activation or inhibition of the pathway. (h) Table showing normalized  $\log_2$  gene expression values of the top up and down regulated genes in Fig. S3g. Each gene is categorized by pathway involved and HD vs non-disease fold change is displayed.

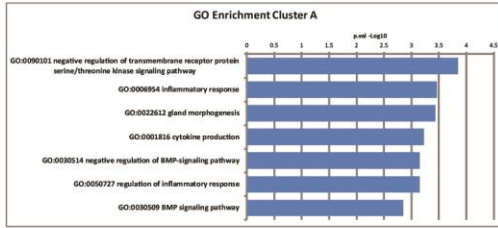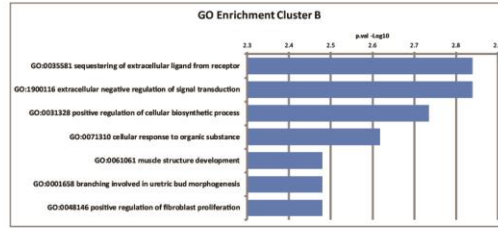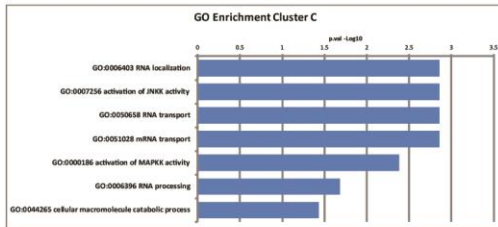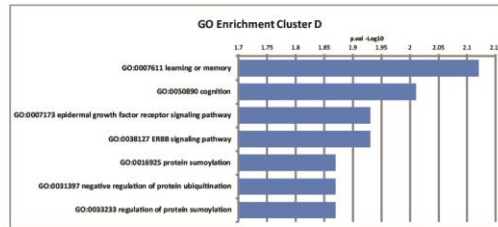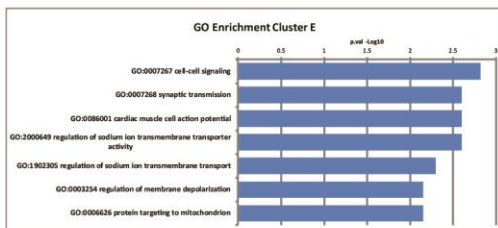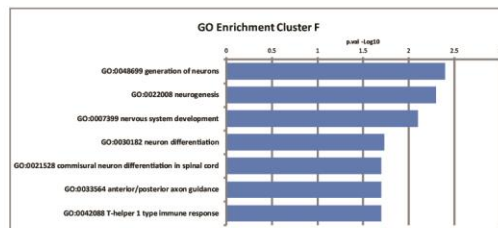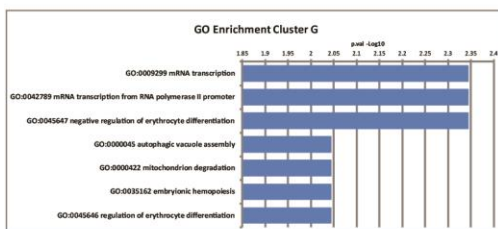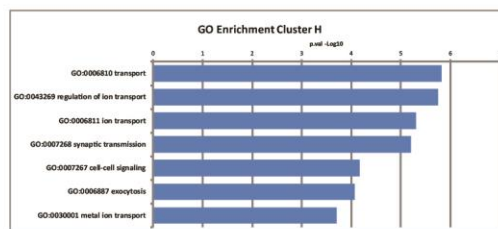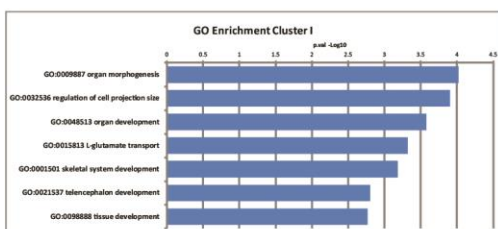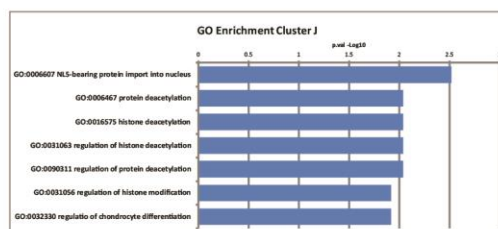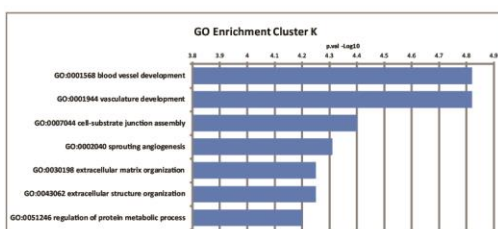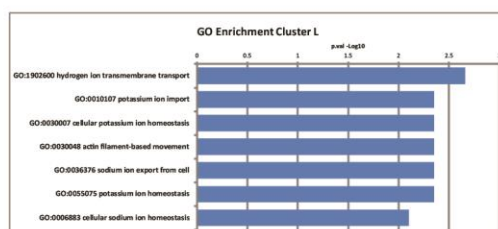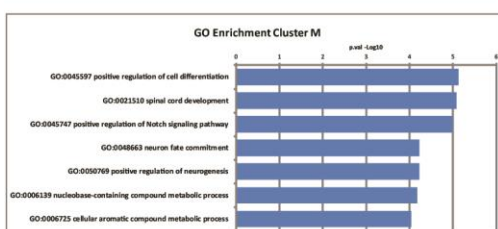

#### Supplementary Figure 4

GO enrichment of common striatal genes.

GO enrichment graphs of lowest p-value categories for each cluster depicted in Figure. 4a, values are in  $-\text{Log}_{10}$ . For GO enrichment, hypergeometric test was used with p-value  $< 0.05$  adjusted with Benjamini-Hochberg correction.

a

| Categories                              | Diseases or Functions Annotation  | Predicted Activation State | Activation z-score | p-Value  |
|-----------------------------------------|-----------------------------------|----------------------------|--------------------|----------|
| Nervous System Development and Function | development of neurons            | Decreased                  | -2.147             | 1.46E-46 |
|                                         | neurotransmission                 | Decreased                  | -2.387             | 6.26E-30 |
|                                         | synaptic transmission             | Decreased                  | -2.603             | 1.11E-27 |
|                                         | synaptic transmission of cells    | Decreased                  | -2.565             | 4.89E-15 |
|                                         | memory                            | Decreased                  | -2.887             | 1.15E-14 |
|                                         | coordination                      | Decreased                  | -5.523             | 1.35E-12 |
|                                         | long-term potentiation            | Decreased                  | -3.811             | 2.31E-12 |
|                                         | guidance of axons                 | Decreased                  | -2.219             | 6.63E-12 |
|                                         | long-term potentiation of synapse | Decreased                  | -2.652             | 1.62E-09 |
|                                         | prepulse inhibition               | Decreased                  | -2.664             | 3.74E-09 |
|                                         | plasticity of synapse             | Decreased                  | -2.592             | 8.45E-09 |
| transport of synaptic vesicles          | Decreased                         | -2.208                     | 2.45E-07           |          |

| Categories                                         | Diseases or Functions Annotation | Predicted Activation State | Activation z-score | p-Value  |
|----------------------------------------------------|----------------------------------|----------------------------|--------------------|----------|
| Behavior & Nervous System Development and Function | behavior                         | Decreased                  | -3.575             | 6.90E-44 |
|                                                    | learning                         | Decreased                  | -3.183             | 6.76E-25 |
|                                                    | memory                           | Decreased                  | -2.887             | 1.15E-14 |
|                                                    | cognition                        | Decreased                  | -2.863             | 1.06E-23 |
|                                                    | conditioning                     | Decreased                  | -2.714             | 1.25E-09 |
|                                                    | emotional behavior               | Decreased                  | -2.128             | 5.33E-17 |

b

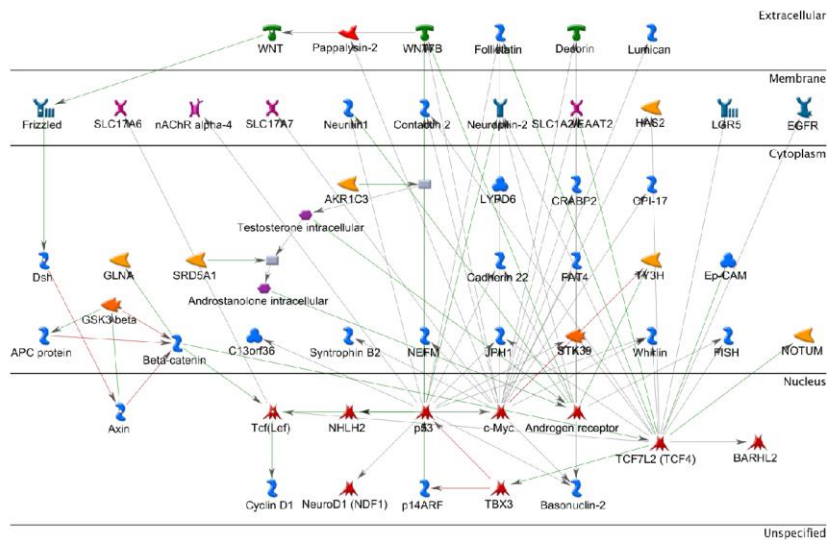

c

| Striatal/Striatal         | MSN 1869 Genes                                                                                                                                                                                                                                                                                                                 |
|---------------------------|--------------------------------------------------------------------------------------------------------------------------------------------------------------------------------------------------------------------------------------------------------------------------------------------------------------------------------|
| <b>Upstream Regulator</b> | <b>Targets</b>                                                                                                                                                                                                                                                                                                                 |
| <b>A2M</b>                | CDH2, CHAT, FOXO1, GAP43, GRIN1, PRLR, SLC40A1, WNT10B, WNT5A                                                                                                                                                                                                                                                                  |
| <b>ACVRL1</b>             | CXCL12, EFNB2, ENG, MYC, PLAT, PLAU, PXN, VEGFA                                                                                                                                                                                                                                                                                |
| <b>COL18A1</b>            | ANTXR1, CD34, CDC25B, EDN1, EFNB2, EPHB1, EPHB4, ETS1, F2RL1, FN1, HIF1AN, ID3, IL6, ITGB3, MMP2, MYC, PLAU, PTGS2, THBS1, TNFRSF1A, VEGFA                                                                                                                                                                                     |
| <b>FST</b>                | ATP1A2, FABP3, FN1, FSHR, FST, GNRH1, IL6, MMP2, MSTN, PRLR                                                                                                                                                                                                                                                                    |
| <b>IGF2BP1</b>            | CD44, COL14A1, COL5A1, COL6A3, LGALS1, LIN28B, LUM, MYC, SERPINH1                                                                                                                                                                                                                                                              |
| <b>ITGA5</b>              | CD44, CDH2, CHRDL1, ENPP2, ERBB2, GAS1, MMP14, MMP2, PLAU, PTGER4, PXN, TGFB2                                                                                                                                                                                                                                                  |
| <b>MAPK1</b>              | ANPEP, APBB3, ATP1A2, ATP1B1, BCL11A, CDH2, CDK5R1, CRABP2, CTNNA2, DEPTOR, DGKI, DLX3, DSE, DUSP1, FLNC, FN1, GBP5, GFOD1, GNG2, GRB7, HOXA11, IL6, ITGB3, LGALS1, LMNA, MMP2, MVP, NRN1, OLFML2A, PDGFB, PDLIM3, PITX2, PLAU, PLD1, POU2F2, PRKG1, PTGS2, RFPL1, RFPL3, SCNN1A, SFRP2, SNAI1, SOCS2, SPP1, TP53, TRIM38, VDR |
| <b>NHLH2</b>              | ADRB2, ASCL1, GNRH1, IL6, PCSK1, TRH                                                                                                                                                                                                                                                                                           |
| <b>PECAM1</b>             | CD44, IL6, MMP2, THBS1                                                                                                                                                                                                                                                                                                         |
| <b>SMAD6</b>              | DNMT3B, IL6, SPP1, TGFB3                                                                                                                                                                                                                                                                                                       |

## Supplementary Figure 5

RNA-seq functional subcategories, interaction map of common striatal genes, and table of genes that regulate human striatal maturation and HD differential gene expression.

(a) RNA-Seq functional subcategories under the super-category nervous system development and function. Select categories listed are predicted to be decreased by calculation of activation z-score. P-value calculated by Fisher's exact test of expected/observed genes found within specific subcategories. Predicted state of subcategories shows a decrease in neuronal development and function, including: synaptic transmission, long-term potentiation, guidance of axons, and organismal effects to learning and memory. (b) Interaction map: Largest connected Network by Direct Interaction sets in Metacore® platform, derived from Cluster I in Figure S4. Green lines represent activation red lines inhibition. (c) 1869 DEGs from RNAseq analysis between HD and non-diseased differentiated iPSCs were compared to genes involved in human striatal maturation. Genes relevant to human striatal maturation were also genes predicted to be upstream regulators of the DEGs found in the HD versus non-diseased iPSC-derived samples.



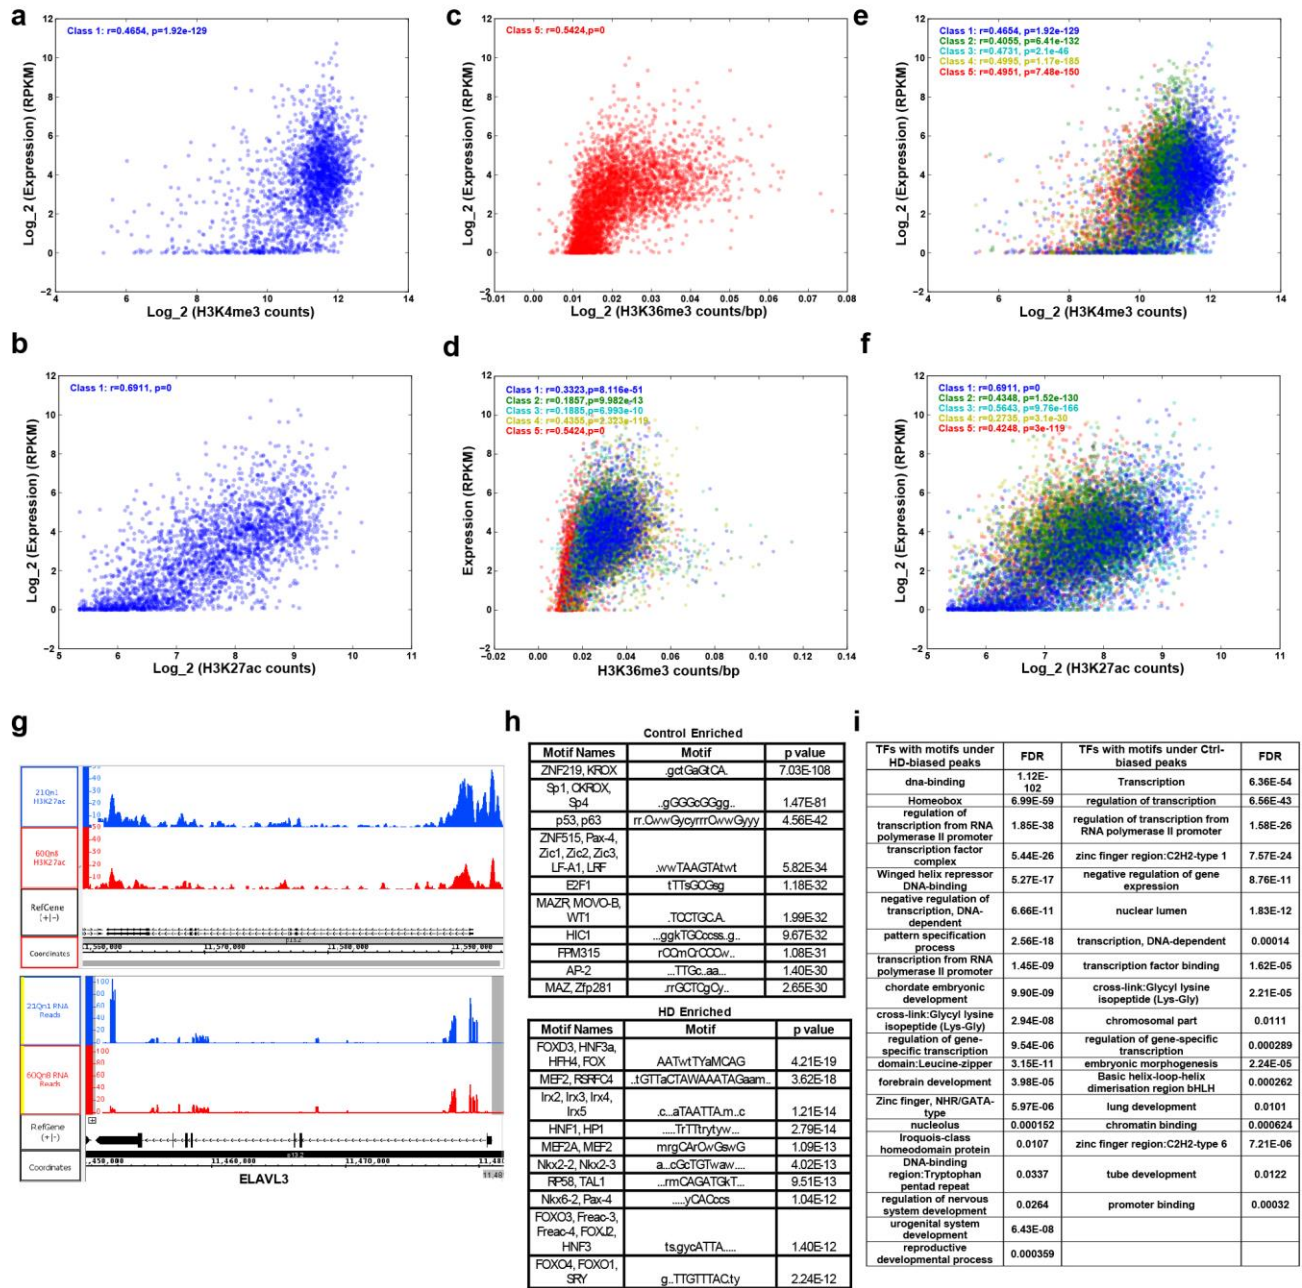

Supplementary Figure 6

RNA-seq and ChIP-seq correlation plots, differential peak height, motif analysis and GO analysis.

(a-c) The number of ChIP-Seq read counts mapped to the area around gene transcription start sites (-2kb up to +3 kb) was correlated with the expression level of that gene according to RNA-Seq. Data are for the 21Qn1 cell line, for all genes in HD-associated epigenetic classes. Pearson  $r$  and two-tailed  $p$  values are shown. Read counts were calculated after normalizing data with FIXSEQ (82). (d-f) The number of ChIP-Seq read counts mapped to the area around gene transcription start sites was correlated with the expression level of that gene, according to RNA-Seq for genes in all epigenetic classes. (g) The number of H3K27Ac ChIP-Seq reads and RNA reads mapped to the area of the human genome around *ELAVL3*, a neuron-specific ribosome binding protein that is down regulated in HD.

Reads from the 21Qn1 non-disease cell line (top) and 60Qn8 HD line (bottom) are shown. Using k-means clustering of the peak profile of *ELAVL3* was assigned to class 1, with its broad peak extending into the gene body from the TSS. Reads were visualized using Integrated Genome Browser. (h) The top 10 motifs found under H3K27ac peaks enriched in HD versus non-disease samples are shown. Motifs were clustered according to similar binding site sequences. The left column shows all members of a cluster, the middle column shows an example binding site for that cluster, and the third column shows the p-value of enrichment of the best member of that motif cluster over the peaks enriched in the opposite treatment group. (i) Gene Ontology categories assigned to enriched transcription factor motifs in HD or non-disease samples and false discovery rate adjusted p-value.

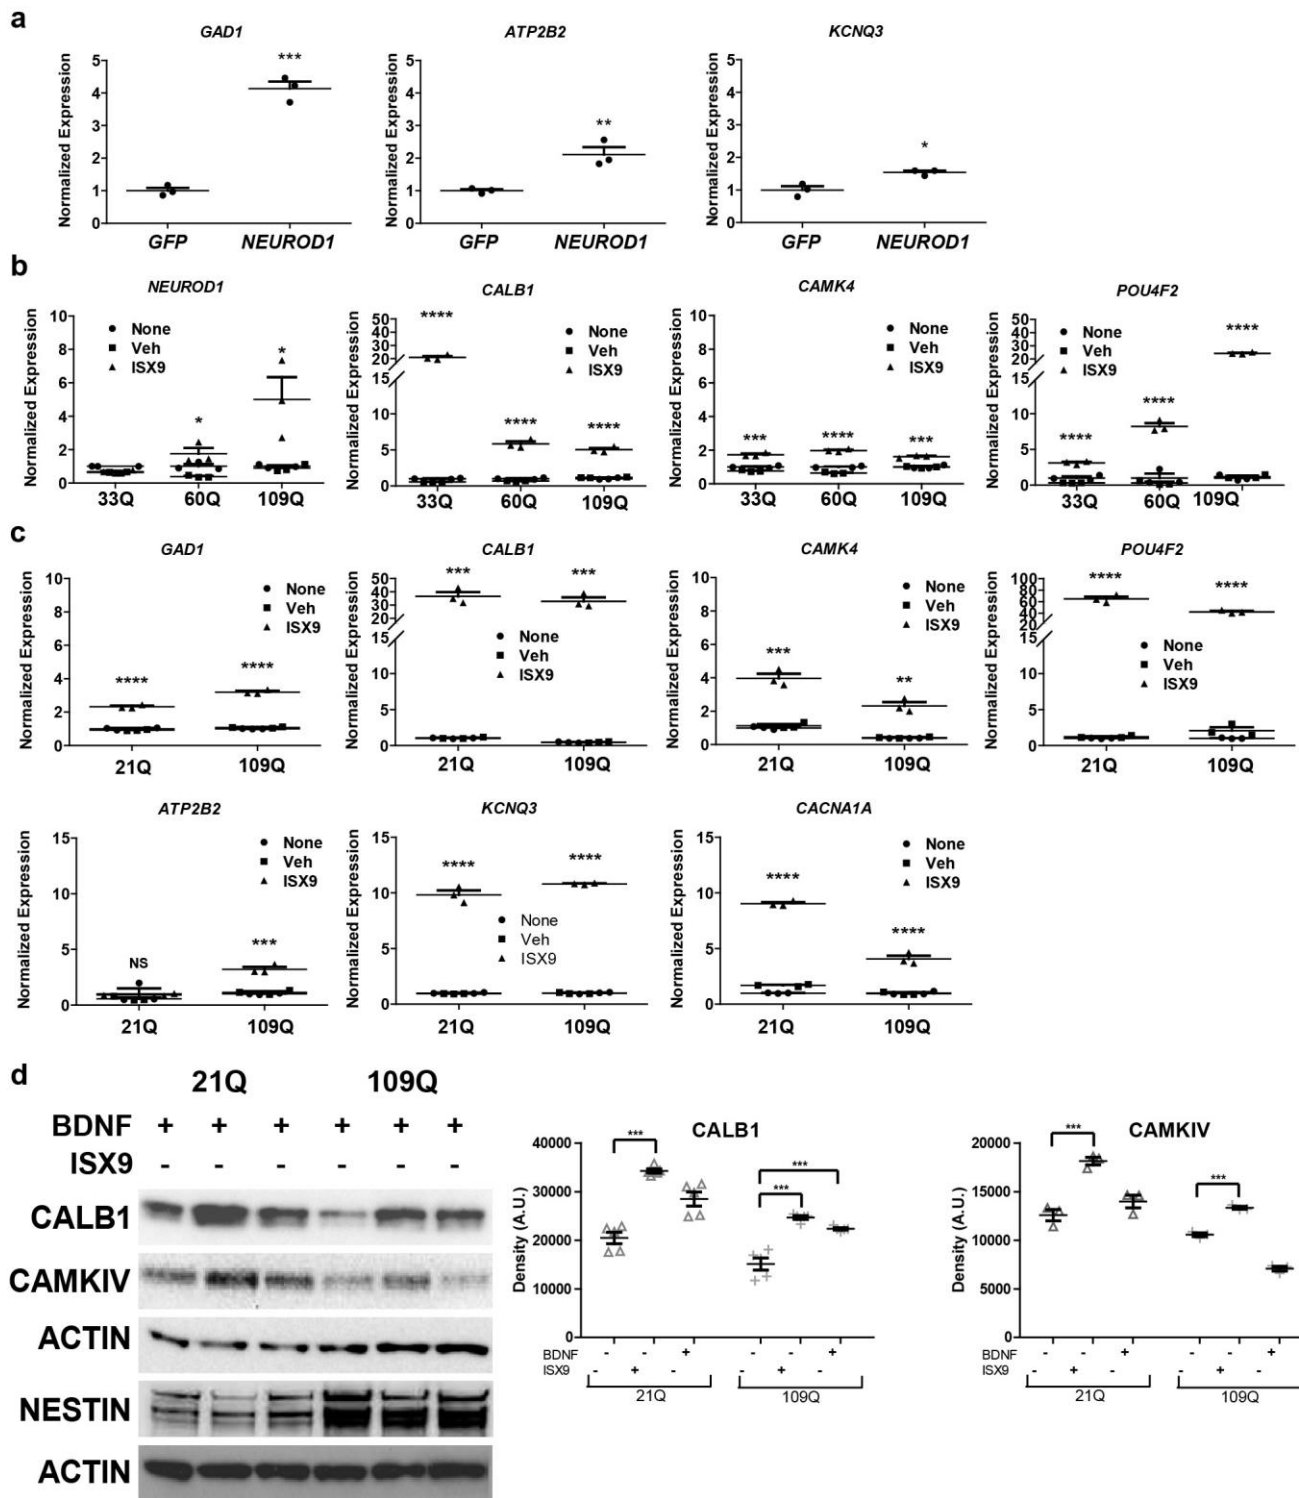

Supplementary Figure 7

NEUROD1 overexpression and Isx-9 increase expression of downregulated transcripts.

(a) NEUROD1 over-expression enhances neuronal gene expression in high CAG repeat lines. Several genes in addition to those depicted in Figure 6 were evaluated in the high CAG repeat HD line 109Q after either human NEUROD1 overexpression lentivirus or pFUGW-eGFP. qPCR demonstrates increased expression of *GAD1* ( $P=0.0002$ ,  $t=13.20$ ,  $df=4$ ), *ATP2B2* ( $P=0.0087$ ,  $t=4.790$ ,  $df=4$ ) and

*KCNQ3* ( $P=0.0121$ ,  $t=4.352$ ,  $df=4$ ). (b) *Isx-9* enhances expression of *NEUROD1* (33Q:  $P=0.4290$ ,  $t=0.879$ ,  $df=4$ ; 60Q:  $P=0.0173$ ,  $t=3.92$ ,  $df=4$ ; 109Q:  $P=0.0374$ ,  $t=3.066$ ,  $df=4$ ) and other neuronal genes *POU4F2* (33Q:  $P<0.0001$ ,  $t=19.95$ ,  $df=4$ ; 60Q:  $P<0.0001$ ,  $t=16.49$ ,  $df=4$ ; 109Q:  $P<0.0001$ ,  $t=51.96$ ,  $df=4$ ), *CAMK4* (33Q:  $P=0.0002$ ,  $t=13.45$ ,  $df=4$ ; 60Q:  $P<0.0001$ ,  $t=24.01$ ,  $df=4$ ; 109Q:  $P=0.0004$ ,  $t=10.98$ ,  $df=4$ ) and *CALB1* (33Q:  $P<0.0001$ ,  $t=19.00$ ,  $df=4$ ; 60Q:  $P=0.0001$ ,  $t=15.36$ ,  $df=4$ ; 109Q:  $P<0.0001$ ,  $t=17.18$ ,  $df=4$ ) in non-disease (33Q) and HD cultures (60Q, 109Q). (c) Additional genes were tested in 21Q and 109Q lines with increased expression of *GAD1* (21Q:  $P<0.0001$ ,  $t=21.86$ ,  $df=4$ ; 109Q:  $P<0.0001$ ,  $t=27.90$ ,  $df=4$ ), *CALB1* (21Q:  $P=0.0004$ ,  $t=10.72$ ,  $df=4$ ; 109Q:  $P=0.0004$ ,  $t=11.19$ ,  $df=4$ ), *CAMK4* (21Q:  $P=0.0007$ ,  $t=9.628$ ,  $df=4$ ; 109Q:  $P=0.0011$ ,  $t=8.390$ ,  $df=4$ ), *POU4F2* (21Q:  $P<0.0001$ ,  $t=16.32$ ,  $df=4$ ; 109Q:  $P<0.0001$ ,  $t=25.26$ ,  $df=4$ ), *KCNQ3* (21Q:  $P<0.0001$ ,  $t=21.84$ ,  $df=4$ ; 109Q:  $P<0.0001$ ,  $t=168.1$ ,  $df=4$ ) and *CACNA1A* (21Q:  $P<0.0001$ ,  $t=50.08$ ,  $df=4$ ; 109Q:  $P=0.0005$ ,  $t=10.19$ ,  $df=4$ ) in all cultures, as well as increased expression of *ATP2B2* in the HD 109Q line (21Q:  $P=0.0548$ ;  $t=2.688$ ,  $df=4$ ; 109Q:  $P=0.001$ ,  $t=8.618$ ,  $df=4$ ). For qPCR analysis, a statistical difference in gene expression between GFP and *NEUROD1* overexpression or vehicle and *Isx-9* treatment was determined using an unpaired two-tailed t-test in GraphPad Prism. (d) *Isx-9* western analysis. 21Q and 109Q cell lines demonstrate increased protein expression of *CALB1* and *CAMKIV* after *Isx-9* treatment. WB results (densitometry) were normalized to *ACTIN*. Statistical significance between *Isx-9* and untreated cells (NIM) was determined by one-way ANOVA. *CALB1*: 21Q plus *ISX9* ( $P=0.0001$ ,  $n=5$  independent differentiations,  $df=1$ ,  $F=123.59$ ). 109Q plus *ISX9* ( $P=0.0001$ ,  $n=5$  independent differentiations,  $df=1$ ,  $F=54.11$ ). 109Q plus *BDNF* ( $P=0.000457$ ,  $n=5$  independent differentiations,  $df=1$ ,  $F=32.43$ ). *CAMKIV*: 21Q plus *ISX9* ( $P=0.001359$ ,  $n=3$  independent differentiations,  $df=1$ ,  $F=63.12$ ). 109Q plus *ISX9* ( $P=0.000337$ ,  $n=3$  independent differentiations,  $df=1$ ,  $F=130.03$ ). Full blots in S8.

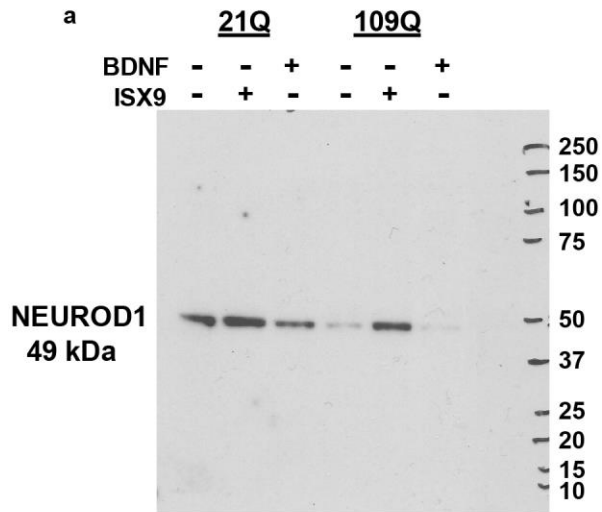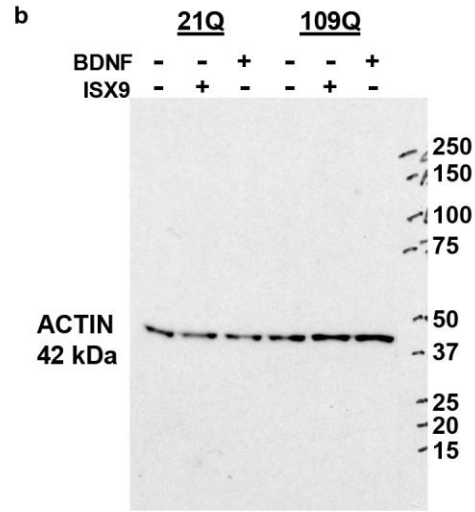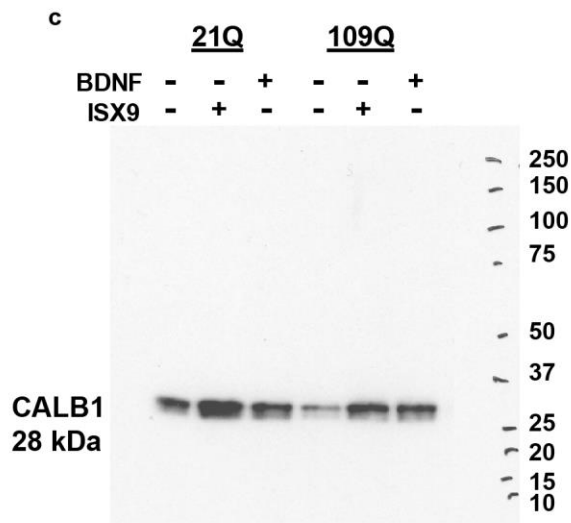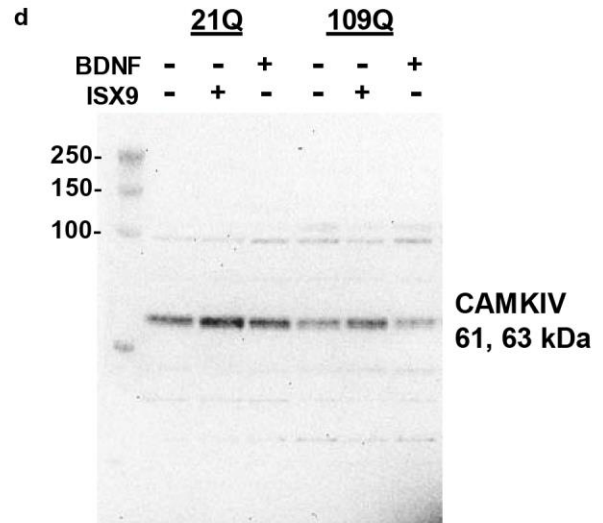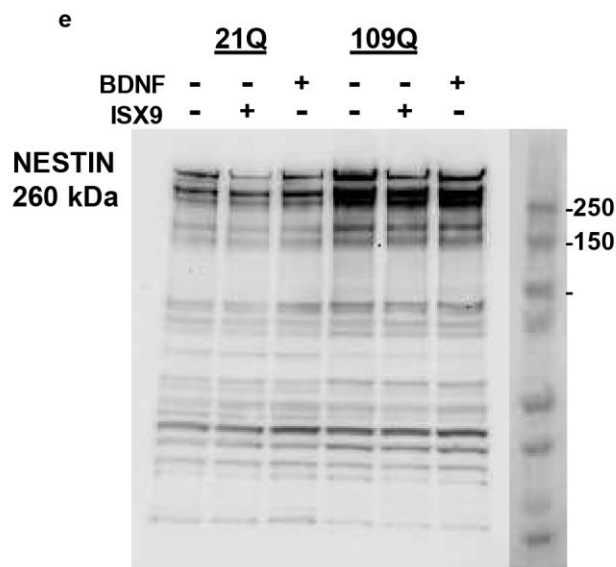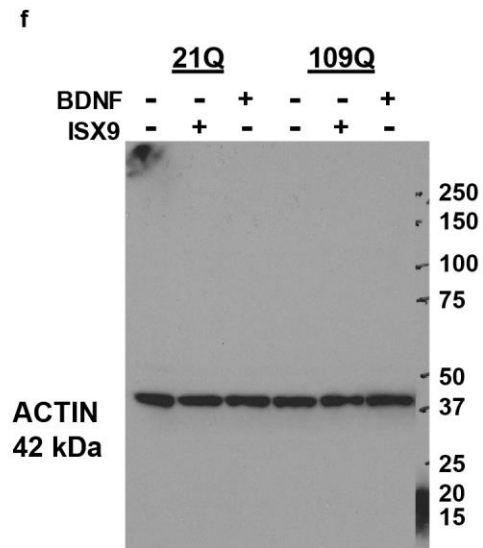

## Supplementary Figure 8

Full western blots with original markings

Full scanned gels for western blots shown in figures 6d (a-b) and S7d (b-f). Some gel images were cropped to merge mw markers with protein bands while removing samples unrelated to study which were ran on the same gel.

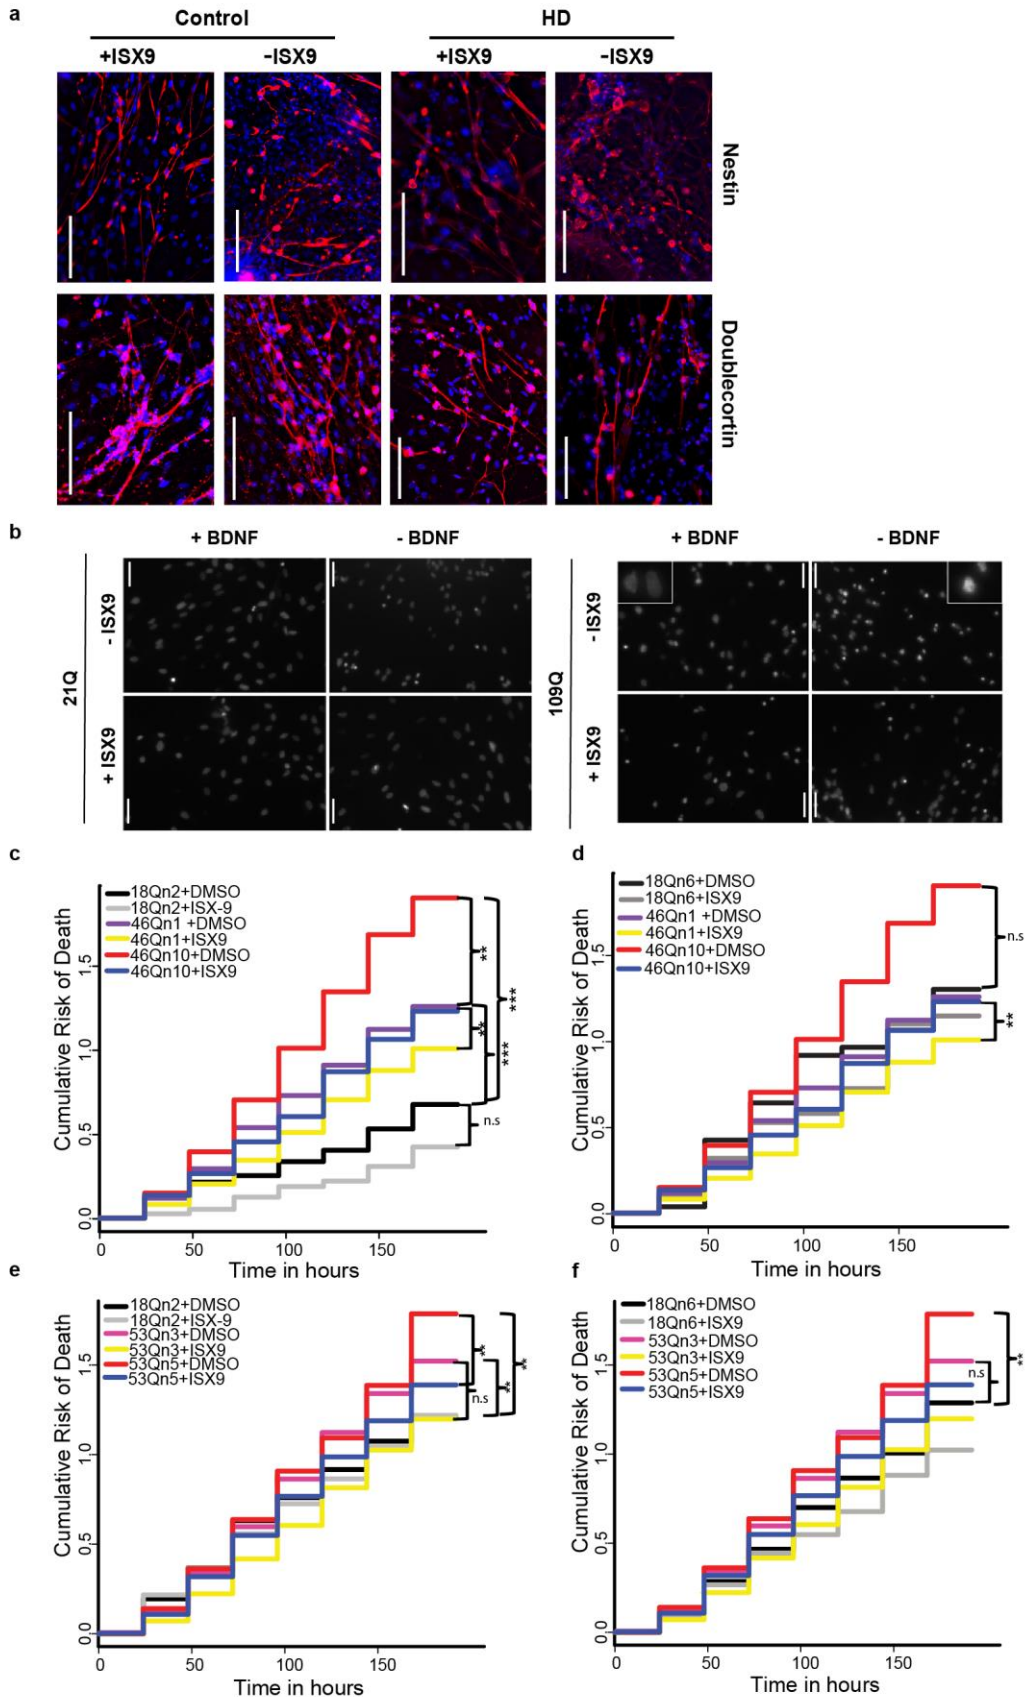

## Supplementary Figure 9

HD and control neural cells show no difference in cell composition after Isx-9 treatment; representative pictures used for nuclear condensation assay; and cumulative risk of death for adult-onset-range differentiated iPSCs.

(a) Immunocytochemistry at day 56 of differentiation demonstrate that both HD and non-disease iPSC lines can generate neural progenitors (NESTIN, DOUBLECORTIN). Scale bar represents 100  $\mu$ m. (b) Differentiated iPSC cultures were treated with ISX-9 or BDNF for 48 h. Nuclei were stained with Hoechst 3343. The images were obtained on an Axiovert 200 inverted microscope and quantified using Volocity. Representative images are shown for each condition. Inserts illustrate healthy nuclei (left panel) and condensed nuclei (right panel). (c) The cumulative risk of death of both the 46Qn1 (HR= 2.1,  $p= 4.16e-06$ ) and 46Qn10 (HR= 2.9,  $p= 0.000243$ ) are greater than the control 18Qn2 line. Addition of 20  $\mu$ M ISX-9 decreases the cumulative risk of death of 46Qn1 (HR= 0.79,  $p= 0.004961$ ) and in the 46Qn10 (HR=0.65,  $p= 5.42e-06$ ). (d) Although we saw a trend in the survival curve of the 46Qn10, we did not see significant differences in the CRD between the 18Qn6 risk of death to the 46Qn1 (HR= 0.87,  $p= 0.4$ ) and the 46Qn10 (HR= 1.2106,  $p= 0.367148$ ) likely due to a low  $n$  as when we combine clones the difference becomes significant as in Figure 7. Control 18Qn2 +DMSO,  $n=69$  cells, Control 18Qn +ISX-9,  $n= 78$  cells, Control 18Qn6+DMSO,  $n=55$  cells, Control 18Qn6+ISX-9,  $n= 66$  cells, ( $n=2$  experiments). 46Qn1 + DMSO,  $n= 414$  cells, 46Qn1+ISX-9,  $n= 474$  cells, ( $n=5$  experiments); 46Qn10+DMSO,  $n= 289$  cells, 46Qn10+ISX-9  $n= 310$  cells, ( $n=5$  experiments). (e) We evaluated the cumulative risk of death of the 53Qn3 lines compared to the controls. We found evidence of non-proportionality for a subset of the lines so we used log rank tests to assess the differences of survival between the HD and controls lines and the effects of ISX-9 on the HD and control lines. All  $p$  values are reported from the log rank test; however, we report the hazard ratios as an estimate of the hazard from the Cox proportional hazards model. (f) The cumulative risk of death of the 18Qn2 is lower risk of death than the 53Qn3 (HR= 1.4,  $p= 0.06$  approaching significance) and 53Qn5 (HR=1.3  $p= 0.00572$ ). Addition of 20  $\mu$ M ISX-9 increases survival of 53Qn3 (HR= 0.74,  $p= 2.4e-06$ ) and 53Qn5 (HR=0.83,  $p= 0.0198$ ) i-neurons. ISX-9 does not significantly change cumulative risk of death for the control Q18n2 ( $p= 0.931$ ). The cumulative risk of death of 18Qn6 is lower than the 53Qn3 (HR= 1.2,  $p= 0.0535$  approaching significance) and 53Qn5 (HR=1.3,  $p= 0.00622$ ). ISX-9 does not significantly change cumulative risk of death for the control Q18n6 ( $p= 0.197$ ). Control 18Qn2 +DMSO,  $n=345$  cells, 18Qn +ISX-9,  $n= 324$  cells, ( $n=4$  experiments) Control 18Qn6+DMSO,  $n=145$  cells, 18Qn6 + DMSO,  $n= 128$  cells, ( $n=3$  experiments); 53Qn3+DMSO, 695 cells, 53Qn3+ISX-9,  $n= 726$  cells, ( $n=6$  experiments); 53Qn5+DMSO, 352 cells, 53Qn5+ISX-9, 381 cells ( $n=3$  experiments).



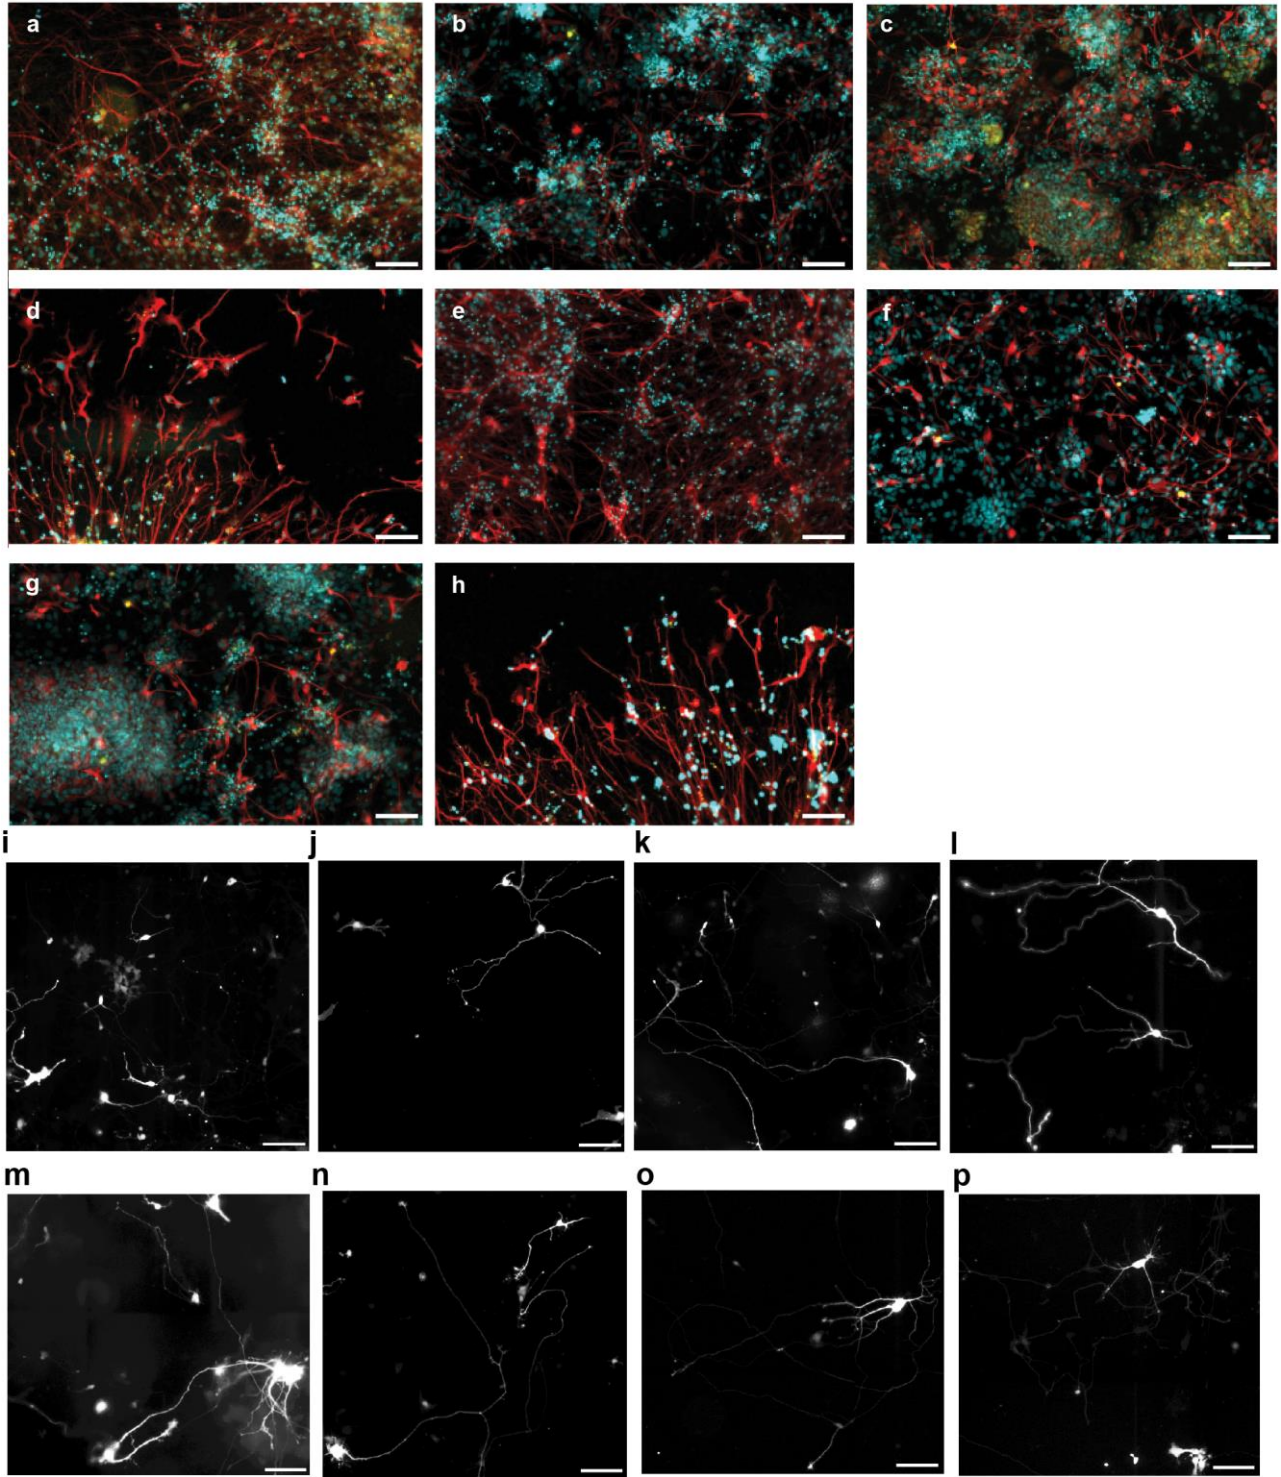

**Supplementary Figure 10**

Representative images of immunocytochemistry staining of differentiated cells that were used in robotic microscopy for survival and neurite-like process length analysis, and representative images of neurons that were subjected to neurite-like length analysis.

(a-h) Cells stain for ~5-15% DARPP-32 positive cells and ~1-15 % Ki67 cells. To determine percent of cells staining for DARPP-32 or Ki67, we subjected the DAPI nuclear stained images to our custom plugin in ImageJ to create an ROI for each cell. The images were processed, thresholded, and masked. These masks subjected to particle analysis that constraints size and shape to reduce the

measuring of artifacts. The masked ROIs were overlaid on to the green channel images and pixels were measured for fluorescent intensity and size. The average intensity values were normalized to the size of the nuclei, and only the nuclei with a value or 0.2 or greater were counted as significant. The number of positive staining nuclei (cyan, blue channel) was divided by total number of nuclei to determine the percentage of KI-67 and DARPP-32 positive cells. MAP-2 (red, red channel) and DARPP-32 (yellow, green channel) staining (a,c, e, g) and staining for MAP-2 (red) and Ki67 (b, d, f, h), of the (a, b) control 28Q, (c, d) 46Q (c, g) 53Q and (e, f) 109Q. Scale bar is 100  $\mu$ m. (i-p) Example images of cells analyzed for process length, (i) 18Qn2, (j) 28Qn6 (k) 46Qn1 (l) 46Qn10 (m) 53Qn3 (n) 53Qn5 (o) 109n4 (p) 109Qn5. Scale bar is 100  $\mu$ m.

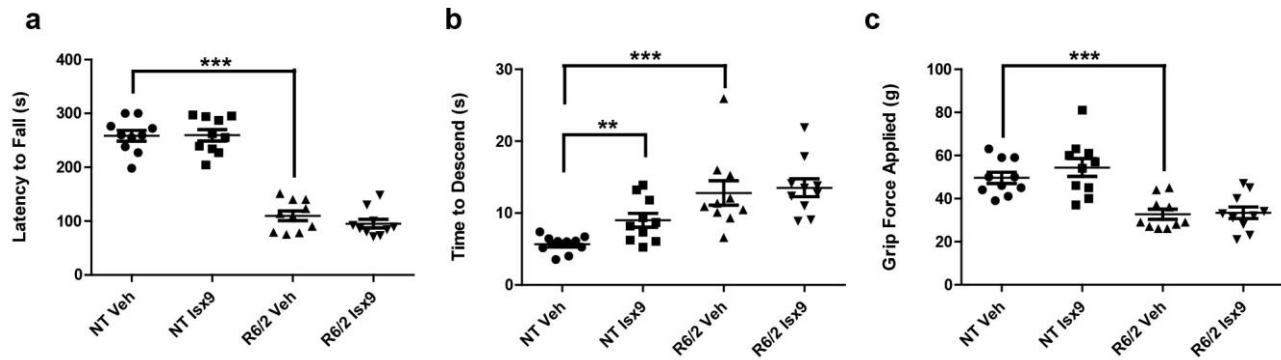

### Supplementary Figure 11

Motor behaviors are not rescued by Isx-9 treatment in R6/2 mice.

Mice were initially tested for specific HD related behavior deficits using tasks that examine motor impairment. Genotype effects were observed by 8 weeks; however, Isx9 did not provide statistically significant differences in treated versus control mice in rotarod (a) pole test (b) or grip strength (c) assays. (a) Rotarod indicates no motor improvements in Isx-9 treated mice. Non-transgenic (NT) and R6/2 mice treated with vehicle (veh) or Isx-9 were subjected to the rotarod task to evaluate motor ability. Impairment was observed in R6/2 mice. Points represent individual mouse scores of time on rotarod measured in seconds. Center lines represent mean of each groups data set and error bar whiskers are indicative of SEM (n=10/group at 8 weeks age). Statistical tests used one-way ANOVA followed by Tukey HSD Test with Scheffé, Bonferroni and Holm multiple comparison calculation also performed post hoc. One-way ANOVA F value 92.8 with 3 degrees of freedom, \*\*\*p=0.001. (b) Pole test indicates no motor improvements in Isx-9 treated R6/2 mice. Non-transgenic (NT) and R6/2 mice treated with vehicle (veh) or Isx-9 were subjected to the pole test task to evaluate motor ability. Impairment was observed in R6/2 mice. Points represent individual mouse scores of time to descend measured in seconds. Center lines represent mean of each groups data set and error bar whiskers are indicative of SEM (n=10/group at 9 weeks age). Statistical tests used one-way ANOVA followed by Tukey HSD Test with Scheffé, Bonferroni and Holm multiple comparison calculation also performed post hoc. One-way ANOVA F value 9.7 with 3 degrees of freedom, \*\*\*p=0.001. (c) Grip strength test indicates no improvements in Isx-9 treated mice. Non-transgenic (NT) and R6/2 mice treated with vehicle (veh) or Isx-9 were subjected to the grip strength task to evaluate forelimb grip. Impairment was observed in R6/2 mice. Points represent individual mouse scores of grip measured in grams of strength. Center lines represent mean of each groups data set and error bar whiskers are indicative of SEM (n=10/group at 10 weeks age). Statistical tests used one-way ANOVA followed by Tukey HSD Test with Scheffé, Bonferroni and Holm multiple comparison calculation also performed post hoc. One-way ANOVA F value 13.6 with 3 degrees of freedom, \*\*\*p=0.001.

| iPS Cell Line     | Clone   | Gender | Diagnosis         | CAG repeats | Coriell Catalog ID (fibroblasts) | Reference                  |
|-------------------|---------|--------|-------------------|-------------|----------------------------------|----------------------------|
| CS25iCTR18 (18Q)  | n2, n6  | FEMALE | Clinically normal | 18          | Submitted, pending               | N/A                        |
| CS00iCTR21 (21Q)  | n1      | MALE   | Clinically normal | 21          | GM05400                          | Sareen et al. (2013, 2014) |
| CS14iCTR28 (28Q)  | n6      | FEMALE | Clinically normal | 28          | GM03814                          | Sareen et al. (2013)       |
| CS83iCTR33 (33Q)  | n1      | FEMALE | Clinically normal | 33          | GM02183                          | Sareen et al. (2013)       |
| CS04iHD46 (46Q)   | n1, n10 | MALE   | HD                | 46          | Submitted, pending               | N/A                        |
| CS03iHD53 (53Q)   | n3, n5  | MALE   | HD                | 53          | Submitted, pending               | N/A                        |
| CS21iHD60 (60Q)   | n5, n8  | FEMALE | HD                | 60          | GM03621                          | Mattis et al. (2015)       |
| CS02iHD66 (66Q)   | n4      | FEMALE | HD                | 66          | Submitted, pending               | N/A                        |
| CS81iHD71 (71Q)   | n3      | FEMALE | HD                | 71          | GM04281                          | N/A                        |
| CS09iHD109 (109Q) | n1, n4  | FEMALE | HD                | 109         | ND39258                          | Mattis et al. (2015)       |

**Table S1. Cell line and Patient information**

Clinical information on subjects with HD and non-disease controls for generation of non-integrating iPSC lines. Abbreviations: CS–Cedars-Sinai; n(clones)–non-integrating; UK–unknown; N/A–not applicable.; HD–Huntington’s disease. All are of Caucasian ethnicity, with the exception of the 21Q non-disease line derived from individual of African American descent.

| Gene Symbol    | Adjusted p-value | Fold Change |
|----------------|------------------|-------------|
| <i>AATK</i>    | 0.036711827      | -2.53       |
| <i>ABAT</i>    | 0.011918424      | -2.56       |
| <i>ABCD2</i>   | 0.063413899      | -2.36       |
| <i>ACADL</i>   | 0.031382471      | 6.80        |
| <i>ACHE</i>    | 0.017760001      | -2.61       |
| <i>ACOT7</i>   | 0.025873824      | -2.29       |
| <i>ACSBG1</i>  | 0.089294738      | -2.84       |
| <i>ACTL6B</i>  | 2.96E-09         | -6.22       |
| <i>ACVR2B</i>  | 0.003342096      | -2.35       |
| <i>ADAM11</i>  | 0.014085633      | -2.64       |
| <i>ADAMTS5</i> | 0.000733667      | 3.40        |
| <i>ADAP1</i>   | 0.016018667      | -3.13       |
| <i>ADARB2</i>  | 0.004180031      | -4.49       |
| <i>ADCY5</i>   | 0.017902873      | -2.38       |
| <i>ADORA2A</i> | 0.004725399      | -3.74       |
| <i>AFAP1L2</i> | 0.000989912      | 2.67        |
| <i>AGAP2</i>   | 0.033922836      | -2.24       |
| <i>AGTPBP1</i> | 0.002891596      | -2.65       |
| <i>AJUBA</i>   | 0.003312275      | 2.77        |
| <i>ALDH1A3</i> | 1.65E-12         | 6.04        |
| <i>ALDOC</i>   | 2.56E-11         | -5.05       |
| <i>AMPH</i>    | 1.22E-06         | -3.94       |
| <i>ANKRD12</i> | 0.067212371      | -1.94       |
| <i>ANKRD45</i> | 0.043996649      | -3.09       |
| <i>ANTXR1</i>  | 0.033403771      | 2.06        |

|                 |             |       |
|-----------------|-------------|-------|
| <i>ANTXR2</i>   | 0.000214251 | 2.80  |
| <i>ANXA2</i>    | 0.044295346 | 1.84  |
| <i>ANXA6</i>    | 0.024643773 | 2.05  |
| <i>APBA1</i>    | 0.007217399 | -2.56 |
| <i>APBB2</i>    | 0.03679557  | -2.26 |
| <i>ARC</i>      | 0.096720174 | -3.11 |
| <i>ARHGAP44</i> | 0.044498608 | -2.34 |
| <i>ARHGDIG</i>  | 3.00E-05    | -7.15 |
| <i>ASB4</i>     | 0.03817112  | 7.31  |
| <i>ASCL1</i>    | 0.029932733 | -2.11 |
| <i>ASIC1</i>    | 0.041364566 | -2.13 |
| <i>ASRGL1</i>   | 0.033922836 | -2.58 |
| <i>ATF5</i>     | 0.000319488 | 2.78  |
| <i>ATPIA2</i>   | 0.006969613 | -2.55 |
| <i>ATPIA3</i>   | 4.07E-09    | -4.41 |
| <i>ATP1B1</i>   | 0.029744925 | -2.30 |
| <i>ATP1B2</i>   | 0.018256589 | -2.19 |
| <i>ATP2B2</i>   | 0.01538077  | -2.40 |
| <i>ATP6V0E1</i> | 0.017866336 | 1.91  |
| <i>ATP6V1G2</i> | 0.002462736 | -2.92 |
| <i>ATP8A1</i>   | 0.034314682 | -1.83 |
| <i>ATP8A2</i>   | 0.014085633 | -2.52 |
| <i>ATP9A</i>    | 0.023729386 | -2.43 |
| <i>AVEN</i>     | 0.088951053 | 2.65  |
| <i>B3GALNT1</i> | 0.003512379 | -3.97 |
| <i>B4GALNT1</i> | 0.007837688 | -2.69 |
| <i>BACH2</i>    | 0.001049373 | -2.72 |
| <i>BAI3</i>     | 4.28E-05    | -3.32 |
| <i>BARHL2</i>   | 0.051402187 | -5.09 |
| <i>BICC1</i>    | 0.032466956 | 2.72  |
| <i>BINI</i>     | 5.66E-05    | 3.20  |
| <i>BMP2</i>     | 0.027630512 | 2.72  |
| <i>BNC2</i>     | 1.29E-07    | 4.67  |
| <i>BOC</i>      | 0.005475373 | 2.26  |
| <i>C10orf35</i> | 0.000247171 | -4.21 |
| <i>C12orf68</i> | 0.014397254 | -2.47 |

|                 |             |       |
|-----------------|-------------|-------|
| <i>C16orf45</i> | 0.038961265 | -2.22 |
| <i>CACNA1A</i>  | 0.007245581 | -2.98 |
| <i>CACNA1B</i>  | 9.52E-05    | -3.49 |
| <i>CACNA1D</i>  | 0.071687643 | -3.43 |
| <i>CACNA1E</i>  | 4.55E-08    | -5.37 |
| <i>CACNB1</i>   | 0.028324048 | 2.27  |
| <i>CACNG2</i>   | 0.031661493 | -4.42 |
| <i>CACNG4</i>   | 0.001794726 | -2.53 |
| <i>CADM3</i>    | 8.57E-05    | -3.20 |
| <i>CADPS</i>    | 6.10E-06    | -3.91 |
| <i>CALB1</i>    | 0.000160447 | -4.85 |
| <i>CALCRL</i>   | 0.029333679 | 2.25  |
| <i>CALY</i>     | 5.64E-07    | -6.36 |
| <i>CAMK1D</i>   | 0.044092327 | -3.25 |
| <i>CAMK2B</i>   | 2.60E-07    | -4.94 |
| <i>CAMK4</i>    | 0.006899552 | -5.09 |
| <i>CAMKV</i>    | 5.72E-12    | -5.55 |
| <i>CAMSAP3</i>  | 0.00011519  | -3.23 |
| <i>CAMTA1</i>   | 0.000551943 | -2.88 |
| <i>CAND2</i>    | 0.00663585  | 2.42  |
| <i>CAP2</i>     | 6.88E-06    | 4.06  |
| <i>CBLN4</i>    | 0.005288494 | 38.13 |
| <i>CCDC64</i>   | 0.025253292 | -2.93 |
| <i>CCND3</i>    | 0.065053543 | 1.74  |
| <i>CD63</i>     | 0.016752353 | 2.19  |
| <i>CDC25B</i>   | 5.22E-05    | 3.53  |
| <i>CDC42EP2</i> | 0.001285043 | 3.37  |
| <i>CDH11</i>    | 6.31E-06    | 3.62  |
| <i>CDH22</i>    | 5.09E-05    | -5.12 |
| <i>CDH6</i>     | 0.003404122 | -2.55 |
| <i>CDH9</i>     | 0.002319373 | -8.73 |
| <i>CDK5R1</i>   | 1.79E-11    | -5.34 |
| <i>CDKL2</i>    | 0.003579989 | -2.83 |
| <i>CDS1</i>     | 0.002723879 | -3.25 |
| <i>CEND1</i>    | 0.000212033 | -4.57 |
| <i>CHD5</i>     | 1.10E-05    | -3.62 |

|                |             |        |
|----------------|-------------|--------|
| <i>CHODL</i>   | 0.014268223 | 2.53   |
| <i>CHRNA3</i>  | 0.002743915 | -4.13  |
| <i>CHRNA4</i>  | 2.10E-05    | -3.79  |
| <i>CITED2</i>  | 0.049240039 | -2.01  |
| <i>CKMT1B</i>  | 0.003730105 | -10.85 |
| <i>CLEC2L</i>  | 0.046198323 | -6.73  |
| <i>CLVS2</i>   | 0.022703812 | -3.41  |
| <i>CNIH2</i>   | 0.031131051 | -2.19  |
| <i>CNKSR3</i>  | 0.01462922  | 2.30   |
| <i>CNNM1</i>   | 0.036915053 | -3.50  |
| <i>CNPY4</i>   | 0.063152515 | 1.68   |
| <i>CNTFR</i>   | 0.001510362 | -2.75  |
| <i>CNTN1</i>   | 0.027631254 | -2.37  |
| <i>CNTN2</i>   | 3.96E-17    | -5.47  |
| <i>CNTNAP5</i> | 0.001794726 | -2.98  |
| <i>CORO1A</i>  | 0.002509878 | -4.01  |
| <i>COX6B2</i>  | 4.82E-05    | -5.17  |
| <i>CPLX1</i>   | 0.000268771 | -4.28  |
| <i>CRABP2</i>  | 0.065303478 | 1.84   |
| <i>CRBI</i>    | 0.007680179 | -2.23  |
| <i>CRHR1</i>   | 0.055500559 | -3.60  |
| <i>CRMP1</i>   | 0.040217842 | -2.52  |
| <i>CRYBG3</i>  | 1.04E-05    | 3.88   |
| <i>CSDC2</i>   | 1.31E-05    | -4.25  |
| <i>CSPG5</i>   | 0.001010745 | -2.89  |
| <i>CSRNP3</i>  | 8.50E-05    | -4.12  |
| <i>CTSS</i>    | 0.036360676 | 4.02   |
| <i>CTTNBP2</i> | 0.027537803 | -3.08  |
| <i>CUX2</i>    | 0.002115216 | -3.01  |
| <i>CX3CR1</i>  | 0.08048561  | 7.67   |
| <i>CXADR</i>   | 0.000243314 | -2.68  |
| <i>CYBRD1</i>  | 4.99E-05    | 3.12   |
| <i>CYP2J2</i>  | 0.061218153 | 3.71   |
| <i>CYP46A1</i> | 0.017021113 | -3.39  |
| <i>DAAM2</i>   | 0.03686396  | 1.64   |
| <i>DABI</i>    | 0.050450028 | -2.92  |

|                |             |        |
|----------------|-------------|--------|
| <i>DCAF6</i>   | 3.10E-05    | 119.88 |
| <i>DCCK</i>    | 0.007940021 | -2.52  |
| <i>DCLK1</i>   | 0.001664471 | -2.83  |
| <i>DCLK2</i>   | 0.016766821 | -2.26  |
| <i>DCN</i>     | 1.16E-10    | 5.28   |
| <i>DDAH1</i>   | 0.003267482 | -2.53  |
| <i>DDX25</i>   | 0.040413867 | -3.16  |
| <i>DENND2A</i> | 0.02193309  | -2.37  |
| <i>DFNB31</i>  | 0.013695696 | -2.54  |
| <i>DGAT2</i>   | 0.054458169 | -2.88  |
| <i>DIRAS1</i>  | 0.008069002 | -2.41  |
| <i>DISP2</i>   | 4.74E-06    | -4.02  |
| <i>DLG4</i>    | 0.002333025 | -2.73  |
| <i>DLGAP1</i>  | 0.014341318 | -2.66  |
| <i>DLGAP2</i>  | 0.008602196 | -3.15  |
| <i>DLL3</i>    | 0.000843516 | -4.03  |
| <i>DMTN</i>    | 3.05E-08    | -5.06  |
| <i>DMXL2</i>   | 0.082801034 | -1.88  |
| <i>DNAJB5</i>  | 0.013026964 | -2.49  |
| <i>DNAJC6</i>  | 1.65E-07    | -3.63  |
| <i>DNER</i>    | 0.000515011 | -3.20  |
| <i>DNM3</i>    | 9.00E-06    | -3.30  |
| <i>DOCK3</i>   | 0.000429124 | -3.19  |
| <i>DOCK4</i>   | 0.00094962  | -2.67  |
| <i>DOK4</i>    | 0.012489837 | -2.60  |
| <i>DOPEY2</i>  | 0.0195545   | -2.20  |
| <i>DPF1</i>    | 0.00445933  | -4.24  |
| <i>DPP10</i>   | 0.032957117 | -1.95  |
| <i>DRAXIN</i>  | 0.072973153 | -2.47  |
| <i>DSCAML1</i> | 1.79E-05    | -5.45  |
| <i>DTXI</i>    | 0.00033048  | -3.15  |
| <i>DUSP16</i>  | 0.001627496 | -2.73  |
| <i>DUSP26</i>  | 3.02E-05    | -5.86  |
| <i>E2F8</i>    | 0.007603063 | 5.27   |
| <i>ECEL1</i>   | 0.010575763 | 2.60   |
| <i>ECT2</i>    | 0.076060133 | -1.97  |

|                 |             |       |
|-----------------|-------------|-------|
| <i>EFHD2</i>    | 0.006793925 | 2.06  |
| <i>EFNA3</i>    | 0.063252371 | -2.19 |
| <i>ELAVL4</i>   | 1.89E-08    | -5.45 |
| <i>ELFN2</i>    | 3.82E-10    | -4.74 |
| <i>ELMO1</i>    | 0.014965805 | -2.69 |
| <i>ELOVL4</i>   | 0.06255971  | -2.16 |
| <i>EMP2</i>     | 0.054042375 | 1.75  |
| <i>ENC1</i>     | 0.002523087 | -2.88 |
| <i>ENKUR</i>    | 0.016988094 | -2.71 |
| <i>ENO2</i>     | 1.86E-07    | -5.35 |
| <i>EPB41L1</i>  | 0.027720035 | -2.24 |
| <i>EPB41LA</i>  | 0.0741788   | -2.21 |
| <i>EPHA4</i>    | 0.01442405  | -2.13 |
| <i>EPHA8</i>    | 0.001316634 | -9.03 |
| <i>EPHB1</i>    | 0.014397254 | -2.06 |
| <i>EPHB4</i>    | 0.001124429 | 2.58  |
| <i>ERBB2</i>    | 0.072136031 | 1.69  |
| <i>ERC2</i>     | 0.004231313 | -3.12 |
| <i>ETS1</i>     | 3.17E-05    | 4.27  |
| <i>EYA4</i>     | 0.009155499 | 2.39  |
| <i>FABP3</i>    | 0.000177461 | 4.12  |
| <i>FABP7</i>    | 0.000194762 | -3.17 |
| <i>FAIM2</i>    | 0.057278124 | -2.19 |
| <i>FAM155A</i>  | 0.009969741 | -2.76 |
| <i>FAM167A</i>  | 0.098324    | -2.14 |
| <i>FAM169A</i>  | 0.001219652 | -2.82 |
| <i>FAM174B</i>  | 0.00618964  | 2.56  |
| <i>FAM189A1</i> | 0.028216673 | -2.78 |
| <i>FAM19A2</i>  | 0.000693218 | -5.26 |
| <i>FAM49A</i>   | 0.004180031 | -2.82 |
| <i>FAM57B</i>   | 0.019255736 | -2.52 |
| <i>FAM60A</i>   | 0.085367995 | -1.86 |
| <i>FAM81A</i>   | 0.012795541 | -3.30 |
| <i>FAM84A</i>   | 0.041298309 | -2.73 |
| <i>FAM84B</i>   | 0.000345588 | -3.20 |
| <i>FAT3</i>     | 0.016101035 | -1.90 |

|               |             |       |
|---------------|-------------|-------|
| <i>FAT4</i>   | 0.098454251 | 1.83  |
| <i>FBLN1</i>  | 7.15E-05    | 4.02  |
| <i>FBLN2</i>  | 0.002409916 | 2.58  |
| <i>FBNI</i>   | 1.18E-05    | 3.74  |
| <i>FBN2</i>   | 0.001679686 | 2.76  |
| <i>FBXL7</i>  | 0.014235078 | 2.10  |
| <i>FGF11</i>  | 0.032883856 | -2.35 |
| <i>FGF12</i>  | 0.098454251 | -2.26 |
| <i>FGF14</i>  | 5.85E-05    | -7.00 |
| <i>FGL2</i>   | 0.000218525 | 5.66  |
| <i>FHDC1</i>  | 0.046720859 | -3.03 |
| <i>FIGN</i>   | 0.023823375 | -2.49 |
| <i>FJX1</i>   | 0.014397254 | -2.21 |
| <i>FKBP14</i> | 0.052198826 | 1.94  |
| <i>FKBP1B</i> | 0.096480721 | -3.33 |
| <i>FLRT2</i>  | 0.00199054  | 2.46  |
| <i>FNI</i>    | 0.001265957 | 2.80  |
| <i>FNIP2</i>  | 0.062096213 | -1.91 |
| <i>FOSL2</i>  | 0.040854324 | 1.89  |
| <i>FOXO1</i>  | 0.039647057 | 1.91  |
| <i>FRMD3</i>  | 0.001081723 | 3.74  |
| <i>FRMD6</i>  | 0.000194267 | 2.85  |
| <i>FRRS1L</i> | 0.077995105 | -2.33 |
| <i>FRY</i>    | 0.033022589 | -2.03 |
| <i>FST</i>    | 2.50E-05    | 4.75  |
| <i>FSTL1</i>  | 0.051495568 | 3.23  |
| <i>FUT9</i>   | 3.42E-09    | -3.78 |
| <i>FXYD7</i>  | 0.051560463 | -2.36 |
| <i>GABBR1</i> | 0.073135296 | -2.13 |
| <i>GABRB1</i> | 0.081684688 | -3.43 |
| <i>GABRB3</i> | 0.003946501 | -2.18 |
| <i>GAD1</i>   | 2.68E-09    | -5.53 |
| <i>GAS1</i>   | 0.000128059 | 2.91  |
| <i>GAS2L3</i> | 0.017522233 | -2.96 |
| <i>GCA</i>    | 0.011427807 | -2.55 |
| <i>GCNT2</i>  | 0.0023932   | -3.39 |

|                |             |         |
|----------------|-------------|---------|
| <i>GDAP1</i>   | 0.067244458 | -2.05   |
| <i>GDPD5</i>   | 0.003823186 | -3.06   |
| <i>GFOD1</i>   | 0.021497801 | -3.39   |
| <i>GIPR</i>    | 0.042059115 | -3.04   |
| <i>GLCCI1</i>  | 0.072314247 | -1.85   |
| <i>GLDC</i>    | 0.096737528 | -1.94   |
| <i>GMDS</i>    | 0.032392317 | 2.03    |
| <i>GNAO1</i>   | 9.70E-10    | -4.30   |
| <i>GNAZ</i>    | 0.000723923 | -2.78   |
| <i>GNG2</i>    | 0.004114124 | -2.82   |
| <i>GNG3</i>    | 6.61E-09    | -5.76   |
| <i>GNG4</i>    | 8.35E-14    | -5.71   |
| <i>GNG7</i>    | 0.036694064 | -2.23   |
| <i>GNG8</i>    | 0.016848145 | -9.18   |
| <i>GOLGA7B</i> | 1.01E-10    | -6.02   |
| <i>GPER1</i>   | 0.07413982  | 3.01    |
| <i>GPR139</i>  | 0.044119793 | -10.33  |
| <i>GPR153</i>  | 0.074835028 | 1.72    |
| <i>GPR158</i>  | 1.31E-07    | -4.20   |
| <i>GPR21</i>   | 0.000517019 | -101.33 |
| <i>GPR22</i>   | 0.000128059 | -13.47  |
| <i>GPR85</i>   | 6.16E-06    | -4.21   |
| <i>GPX8</i>    | 3.01E-05    | 3.13    |
| <i>GREM2</i>   | 0.003900725 | 3.18    |
| <i>GRIA1</i>   | 1.02E-05    | -3.54   |
| <i>GRIA2</i>   | 1.58E-11    | -5.02   |
| <i>GRIA4</i>   | 0.008758467 | -3.91   |
| <i>GRIN1</i>   | 1.13E-09    | -9.96   |
| <i>GRIN2B</i>  | 0.002393606 | -2.43   |
| <i>GRN</i>     | 0.018320864 | 2.04    |
| <i>GSX2</i>    | 0.008206541 | -12.65  |
| <i>HAS2</i>    | 1.10E-06    | 3.83    |
| <i>HBEGF</i>   | 0.014406204 | -3.48   |
| <i>HCN3</i>    | 1.47E-05    | -3.72   |
| <i>HCN4</i>    | 1.99E-08    | -5.25   |
| <i>HECW1</i>   | 5.09E-05    | -5.06   |

|                |             |        |
|----------------|-------------|--------|
| <i>HES5</i>    | 0.082655667 | -3.19  |
| <i>HOOK1</i>   | 0.046791324 | -2.09  |
| <i>HPCA</i>    | 3.63E-10    | -7.20  |
| <i>HPCAL1</i>  | 0.009298532 | -2.56  |
| <i>HPCAL4</i>  | 3.23E-06    | -3.28  |
| <i>HSPA2</i>   | 0.000120763 | 4.26   |
| <i>HTR5A</i>   | 0.001773233 | -11.65 |
| <i>HTRA1</i>   | 0.032315931 | 1.87   |
| <i>ICA1</i>    | 0.084401304 | -3.33  |
| <i>IGDCC3</i>  | 0.007493086 | -2.75  |
| <i>IGSF9B</i>  | 0.071687643 | -1.99  |
| <i>ILDR2</i>   | 0.007217131 | -3.60  |
| <i>INA</i>     | 1.17E-08    | -4.69  |
| <i>INHA</i>    | 0.013191375 | -5.69  |
| <i>INPP4B</i>  | 0.000715269 | 4.02   |
| <i>INPPL1</i>  | 0.026233049 | 2.08   |
| <i>INSM1</i>   | 5.39E-05    | -3.83  |
| <i>IQGAP2</i>  | 0.020011593 | -2.55  |
| <i>ITIH5</i>   | 0.002460161 | 3.40   |
| <i>JAKMIP1</i> | 3.20E-07    | -8.59  |
| <i>JAKMIP2</i> | 0.061111711 | -2.06  |
| <i>JAM3</i>    | 0.039252939 | 1.94   |
| <i>JPH1</i>    | 4.00E-15    | 9.34   |
| <i>JPH3</i>    | 0.011564736 | -2.48  |
| <i>KATNAL1</i> | 0.023731398 | -2.22  |
| <i>KCNA6</i>   | 0.000281089 | -3.45  |
| <i>KCNB1</i>   | 0.081414769 | -2.23  |
| <i>KCNB2</i>   | 0.003255879 | -5.99  |
| <i>KCNC2</i>   | 0.016016119 | -3.57  |
| <i>KCNH4</i>   | 0.002960608 | -4.97  |
| <i>KCNH7</i>   | 0.056621053 | -5.04  |
| <i>KCNIP1</i>  | 0.036051677 | -2.21  |
| <i>KCNIP3</i>  | 0.040413867 | 1.91   |
| <i>KCNQ2</i>   | 0.063121268 | -2.01  |
| <i>KCNQ3</i>   | 0.00067795  | -6.72  |
| <i>KCTD13</i>  | 0.001680751 | -3.20  |

|                  |             |       |
|------------------|-------------|-------|
| <i>KCTD16</i>    | 0.007985318 | -3.02 |
| <i>KDELC1</i>    | 0.073446611 | 1.88  |
| <i>KHDRBS2</i>   | 0.021295571 | -3.76 |
| <i>KIAA0319</i>  | 1.28E-06    | -5.56 |
| <i>KIAA0513</i>  | 0.065050619 | -2.00 |
| <i>KIAA1244</i>  | 0.020420412 | -2.41 |
| <i>KIAA1324</i>  | 0.027323442 | -3.35 |
| <i>KIAA1598</i>  | 0.000369383 | -3.31 |
| <i>KIDINS220</i> | 0.098592244 | -2.09 |
| <i>KIF5A</i>     | 1.14E-08    | -4.05 |
| <i>KIF5C</i>     | 0.028868512 | -2.61 |
| <i>KIFC2</i>     | 0.048833738 | -2.32 |
| <i>KIRREL3</i>   | 0.009126212 | -2.82 |
| <i>KLF5</i>      | 0.040131512 | 2.09  |
| <i>KLHL1</i>     | 8.62E-06    | -6.20 |
| <i>KLHL23</i>    | 0.045389219 | -2.22 |
| <i>KNDC1</i>     | 0.054285586 | -2.01 |
| <i>KREMEN1</i>   | 6.79E-05    | 3.76  |
| <i>LGALS1</i>    | 0.003478419 | 2.25  |
| <i>LGI1</i>      | 0.017866336 | -3.85 |
| <i>LGI2</i>      | 0.096908076 | 1.82  |
| <i>LHFP</i>      | 0.026455545 | 1.85  |
| <i>LHFPL4</i>    | 6.69E-13    | -5.16 |
| <i>LIMA1</i>     | 0.027814449 | 1.81  |
| <i>LIN28B</i>    | 0.001305    | -4.50 |
| <i>LINGO1</i>    | 0.000887513 | -2.99 |
| <i>LIPA</i>      | 0.038916164 | 2.19  |
| <i>LIX1</i>      | 3.50E-05    | -3.35 |
| <i>LMO1</i>      | 0.000327005 | -3.88 |
| <i>LMO2</i>      | 0.086803056 | -2.51 |
| <i>LMO3</i>      | 7.60E-07    | -3.55 |
| <i>LMTK3</i>     | 1.57E-05    | -3.80 |
| <i>LOXL1</i>     | 0.01452933  | 1.90  |
| <i>LOXL2</i>     | 4.17E-08    | 5.92  |
| <i>LPAR1</i>     | 0.00010994  | 2.84  |
| <i>LPPR5</i>     | 0.071499298 | -2.24 |

|                 |             |       |
|-----------------|-------------|-------|
| <i>LRRC55</i>   | 4.09E-05    | -3.41 |
| <i>LRRC7</i>    | 0.038772185 | -2.45 |
| <i>LRRN3</i>    | 0.008758467 | -2.34 |
| <i>LRRTM2</i>   | 5.95E-09    | -4.27 |
| <i>LRRTM3</i>   | 0.000381025 | -3.87 |
| <i>LUM</i>      | 0.000249947 | 3.91  |
| <i>LYPD6</i>    | 0.004153504 | -2.54 |
| <i>MAGI2</i>    | 0.031450312 | -2.09 |
| <i>MAML3</i>    | 0.018639343 | -2.10 |
| <i>MAP1LC3A</i> | 0.080532788 | -2.99 |
| <i>MAP3K9</i>   | 0.008206541 | -2.68 |
| <i>MAPK10</i>   | 0.025468157 | -2.46 |
| <i>MAPRE2</i>   | 0.059194577 | -2.05 |
| <i>MCF2L</i>    | 0.000171165 | -3.32 |
| <i>MCM4</i>     | 0.071687643 | 1.83  |
| <i>MCU</i>      | 0.000660837 | 2.84  |
| <i>ME3</i>      | 0.02855835  | -3.89 |
| <i>MEF2A</i>    | 0.040281669 | 1.97  |
| <i>MEGF10</i>   | 0.038524242 | 2.11  |
| <i>MEST</i>     | 0.015482488 | 3.10  |
| <i>MFAP2</i>    | 0.004649134 | 2.22  |
| <i>MFAP4</i>    | 0.000369147 | 5.16  |
| <i>MFNG</i>     | 0.000627837 | -5.92 |
| <i>MGAT4A</i>   | 0.029702917 | -1.99 |
| <i>MME</i>      | 3.88E-14    | 8.14  |
| <i>MMP14</i>    | 0.001081723 | 3.21  |
| <i>MMP24</i>    | 4.77E-12    | -5.86 |
| <i>MN1</i>      | 0.034221955 | -2.22 |
| <i>MSI1</i>     | 0.020727253 | -2.12 |
| <i>MT3</i>      | 0.000951382 | -5.97 |
| <i>MTMR7</i>    | 0.000463481 | -3.44 |
| <i>MTSS1</i>    | 0.080931073 | -1.99 |
| <i>MYC</i>      | 0.002684626 | 2.78  |
| <i>MYO6</i>     | 0.048496078 | -2.08 |
| <i>MYT1</i>     | 2.06E-11    | -5.36 |
| <i>MYT1L</i>    | 5.62E-16    | -6.91 |

|                |             |        |
|----------------|-------------|--------|
| <i>NALCN</i>   | 0.024643773 | -3.61  |
| <i>NAPB</i>    | 7.20E-08    | -4.24  |
| <i>NAV2</i>    | 0.014610222 | -2.32  |
| <i>NAV3</i>    | 0.003996178 | -2.43  |
| <i>NBL1</i>    | 0.09193553  | 1.63   |
| <i>NCAM1</i>   | 0.034634674 | -2.13  |
| <i>NCOA1</i>   | 0.000963608 | 2.83   |
| <i>NDRG4</i>   | 0.000618139 | -3.43  |
| <i>NECAB2</i>  | 0.000241791 | -3.63  |
| <i>NEDD9</i>   | 0.031450312 | -4.25  |
| <i>NEFM</i>    | 0.002343291 | -3.07  |
| <i>NEGR1</i>   | 0.004113031 | -2.28  |
| <i>NEK7</i>    | 0.036036065 | 2.03   |
| <i>NEUROD1</i> | 1.40E-16    | -14.20 |
| <i>NEUROG2</i> | 3.47E-09    | -17.37 |
| <i>NFASC</i>   | 0.000758572 | -3.00  |
| <i>NFATC4</i>  | 0.004860471 | 2.20   |
| <i>NGEF</i>    | 0.000268771 | -3.73  |
| <i>NHLH2</i>   | 0.007284009 | -5.89  |
| <i>NLGN1</i>   | 0.084604006 | -1.99  |
| <i>NMNAT2</i>  | 0.000141029 | -2.73  |
| <i>NOVA1</i>   | 0.036421007 | -2.31  |
| <i>NPAS3</i>   | 0.003478419 | -2.47  |
| <i>NPNT</i>    | 0.04976221  | 2.05   |
| <i>NR3C2</i>   | 0.001016876 | 4.17   |
| <i>NRGN</i>    | 2.27E-10    | -7.71  |
| <i>NRN1</i>    | 0.058030878 | -2.15  |
| <i>NRP2</i>    | 0.026349215 | -2.05  |
| <i>NRSN1</i>   | 6.98E-08    | -4.66  |
| <i>NRXN1</i>   | 0.000368472 | -2.67  |
| <i>NRXN2</i>   | 0.001827511 | -2.84  |
| <i>NRXN3</i>   | 0.001800588 | -2.53  |
| <i>NSG1</i>    | 0.014057492 | -3.00  |
| <i>NTM</i>     | 0.048544065 | -2.33  |
| <i>NTNG1</i>   | 0.019321312 | 2.19   |
| <i>NTRK2</i>   | 0.060262516 | -2.02  |



|                |             |        |
|----------------|-------------|--------|
| <i>NTSR1</i>   | 8.10E-08    | -13.16 |
| <i>NYAP2</i>   | 0.000212301 | -6.19  |
| <i>OGN</i>     | 9.45E-07    | 3.96   |
| <i>OLFM1</i>   | 2.08E-07    | -5.61  |
| <i>OLFML2A</i> | 8.04E-07    | 4.15   |
| <i>OLFML2B</i> | 3.47E-09    | 4.65   |
| <i>OLIG1</i>   | 0.05939123  | -3.02  |
| <i>OLIG2</i>   | 0.044133948 | -3.14  |
| <i>OMD</i>     | 7.79E-05    | 5.85   |
| <i>OPCML</i>   | 0.002879492 | -2.72  |
| <i>OPRL1</i>   | 0.061111711 | -2.63  |
| <i>OTX1</i>    | 0.023114919 | -6.48  |
| <i>P4HA3</i>   | 1.16E-05    | 3.35   |
| <i>PAK6</i>    | 5.75E-05    | -5.20  |
| <i>PAK7</i>    | 2.25E-15    | -7.42  |
| <i>PAPPA2</i>  | 9.09E-08    | 5.81   |
| <i>PAQR3</i>   | 0.026896863 | -2.23  |
| <i>PAQR9</i>   | 0.044532245 | -5.67  |
| <i>PARVA</i>   | 0.014533076 | 2.16   |
| <i>PCDH17</i>  | 0.00087321  | -2.48  |
| <i>PCDH9</i>   | 0.023524892 | -1.86  |
| <i>PCP4L1</i>  | 2.36E-14    | -10.10 |
| <i>PDE1B</i>   | 0.099208597 | -2.24  |
| <i>PDE2A</i>   | 0.000122375 | -3.59  |
| <i>PDE4A</i>   | 0.020791943 | -2.33  |
| <i>PDE7B</i>   | 0.003512379 | 2.59   |
| <i>PDGFRA</i>  | 0.058168121 | 1.68   |
| <i>PDGFRL</i>  | 3.45E-15    | 9.11   |
| <i>PDK1</i>    | 5.29E-06    | -3.66  |
| <i>PDK4</i>    | 0.027970741 | 2.21   |
| <i>PDLIM4</i>  | 0.003478419 | 2.04   |
| <i>PDXP</i>    | 0.040854324 | -2.16  |
| <i>PEA15</i>   | 0.016427606 | -3.44  |
| <i>PFKFB3</i>  | 0.052482853 | -2.23  |
| <i>PFKP</i>    | 0.001263431 | -2.89  |
| <i>PGBD5</i>   | 0.040393581 | 1.83   |

|                 |             |       |
|-----------------|-------------|-------|
| <i>PHLDB2</i>   | 0.057750387 | 1.93  |
| <i>PHYHIP</i>   | 0.009182937 | -3.05 |
| <i>PKDCC</i>    | 0.013746725 | 1.94  |
| <i>PKIA</i>     | 0.006689146 | -2.51 |
| <i>PLCB1</i>    | 0.089745678 | -1.90 |
| <i>PLCH1</i>    | 0.046198323 | -2.07 |
| <i>PLCXD2</i>   | 0.08518509  | -3.28 |
| <i>PLD1</i>     | 0.052286126 | 2.28  |
| <i>PLEKHH2</i>  | 0.097003796 | 1.65  |
| <i>PLXNB1</i>   | 0.077070837 | -1.99 |
| <i>PMEP1</i>    | 0.039160284 | 1.80  |
| <i>PMP22</i>    | 0.023166751 | 2.68  |
| <i>PNMA2</i>    | 0.023307905 | -2.28 |
| <i>POU3F3</i>   | 4.31E-05    | -3.60 |
| <i>PPAP2B</i>   | 0.00445933  | 2.55  |
| <i>PPF1A2</i>   | 4.31E-10    | -6.39 |
| <i>PPF1A3</i>   | 0.000725164 | -3.00 |
| <i>PPIC</i>     | 0.068517144 | 1.67  |
| <i>PPP1R14A</i> | 0.025590325 | -8.10 |
| <i>PPP1R14C</i> | 0.007524571 | -2.51 |
| <i>PPP1R16B</i> | 3.08E-06    | -4.72 |
| <i>PPP2R2B</i>  | 0.000178323 | -3.35 |
| <i>PPP2R2C</i>  | 1.02E-06    | -3.64 |
| <i>PPP2R5B</i>  | 0.001371858 | -3.01 |
| <i>PRDX6</i>    | 3.08E-05    | 3.67  |
| <i>PRKAR2B</i>  | 5.81E-09    | -4.28 |
| <i>PRKCB</i>    | 0.077913415 | -2.56 |
| <i>PRKCZ</i>    | 0.046808    | -2.29 |
| <i>PROX1</i>    | 0.053744516 | -2.04 |
| <i>PRR16</i>    | 0.001970415 | 3.83  |
| <i>PRRT2</i>    | 0.004497579 | -2.69 |
| <i>PRRX1</i>    | 6.35E-08    | 4.47  |
| <i>PSD</i>      | 0.000115989 | -3.30 |
| <i>PSD2</i>     | 4.26E-11    | -5.20 |
| <i>PTPN5</i>    | 0.040760153 | -2.22 |
| <i>PTPRO</i>    | 0.021798893 | -3.79 |

|                  |             |        |
|------------------|-------------|--------|
| <i>PTPRZ1</i>    | 0.007242019 | -2.76  |
| <i>RAB11FIP4</i> | 0.001959665 | -2.61  |
| <i>RAB3A</i>     | 5.32E-12    | -5.54  |
| <i>RAB3B</i>     | 0.006185163 | -3.68  |
| <i>RAB3C</i>     | 0.016752353 | -2.36  |
| <i>RAB6B</i>     | 0.000165693 | -3.47  |
| <i>RACGAP1</i>   | 0.061111711 | -2.05  |
| <i>RADIL</i>     | 0.050092741 | -2.62  |
| <i>RAP1GAP</i>   | 0.073287114 | -2.26  |
| <i>RAPGEF5</i>   | 3.79E-07    | -6.01  |
| <i>RASD2</i>     | 0.002144591 | -2.96  |
| <i>RASGEF1A</i>  | 0.00518523  | -5.67  |
| <i>RASGEF1B</i>  | 0.029744925 | -2.94  |
| <i>RASGRF1</i>   | 0.000983191 | -5.51  |
| <i>RASGRP1</i>   | 8.01E-08    | -8.05  |
| <i>RASGRP2</i>   | 0.000661167 | -3.95  |
| <i>RASL10B</i>   | 0.061380563 | -2.08  |
| <i>RASSF4</i>    | 0.024259042 | 1.84   |
| <i>RBFOX3</i>    | 1.70E-05    | -6.20  |
| <i>RCC2</i>      | 0.094164925 | 1.63   |
| <i>RCN1</i>      | 0.041222555 | 1.83   |
| <i>RCN3</i>      | 0.003630156 | 2.39   |
| <i>RCOR2</i>     | 0.000710639 | -3.05  |
| <i>RECK</i>      | 0.008590251 | 2.45   |
| <i>RELL2</i>     | 0.028496092 | -2.69  |
| <i>REM2</i>      | 2.10E-05    | -9.44  |
| <i>RERG</i>      | 1.40E-10    | 6.42   |
| <i>RFX4</i>      | 0.060272216 | -1.70  |
| <i>RGS10</i>     | 0.074352913 | 2.24   |
| <i>RGS17</i>     | 0.087574304 | -2.99  |
| <i>RGS7BP</i>    | 0.000573434 | -4.66  |
| <i>RGS8</i>      | 5.36E-06    | -14.61 |
| <i>RHBDL3</i>    | 0.000214365 | -2.92  |
| <i>RIMS1</i>     | 0.000112905 | -5.01  |
| <i>RIT2</i>      | 0.077995105 | -1.94  |
| <i>RND1</i>      | 0.009754406 | -3.99  |

|                 |             |       |
|-----------------|-------------|-------|
| <i>RND2</i>     | 0.010976423 | -2.69 |
| <i>RNF152</i>   | 0.040760153 | -3.05 |
| <i>ROBO2</i>    | 0.065861491 | -2.00 |
| <i>RPH3A</i>    | 0.050576525 | -2.80 |
| <i>RPS6KL1</i>  | 1.25E-08    | -5.90 |
| <i>RSPH9</i>    | 0.038137748 | -3.53 |
| <i>RTN1</i>     | 1.84E-06    | -3.98 |
| <i>RUNDC3B</i>  | 7.09E-07    | -5.05 |
| <i>S100A4</i>   | 0.000484567 | 6.51  |
| <i>SIPR1</i>    | 0.014593437 | -2.66 |
| <i>SAPCD2</i>   | 0.015907556 | -2.56 |
| <i>SCAMP5</i>   | 0.0443503   | -2.19 |
| <i>SCN1A</i>    | 9.31E-06    | -3.69 |
| <i>SCN2A</i>    | 4.93E-07    | -4.43 |
| <i>SCN3A</i>    | 0.021598665 | -2.14 |
| <i>SCN3B</i>    | 0.000119026 | -3.13 |
| <i>SCPEP1</i>   | 0.004019005 | 2.17  |
| <i>SDCI</i>     | 0.074660479 | 1.71  |
| <i>SELENBP1</i> | 0.00223656  | 2.43  |
| <i>SEMA3D</i>   | 0.025926829 | 2.56  |
| <i>SEMA3F</i>   | 0.097359548 | 1.76  |
| <i>SEMA4A</i>   | 0.034745853 | -3.27 |
| <i>SEMA6B</i>   | 0.089842085 | 1.81  |
| <i>SERPINH1</i> | 0.008945957 | 2.68  |
| <i>SERTAD3</i>  | 0.014745916 | 2.25  |
| <i>SERTM1</i>   | 1.62E-07    | 6.11  |
| <i>SEZ6L</i>    | 2.34E-12    | -5.00 |
| <i>SFRP2</i>    | 0.035789763 | 2.00  |
| <i>SGCD</i>     | 0.000235438 | 11.35 |
| <i>SGIP1</i>    | 0.007740785 | -2.82 |
| <i>SGK223</i>   | 0.088794472 | -2.23 |
| <i>SGSM1</i>    | 0.000381025 | -2.98 |
| <i>SH3GL2</i>   | 0.090892872 | -1.79 |
| <i>SH3PXD2A</i> | 0.003047099 | 2.86  |
| <i>SHANK1</i>   | 2.66E-05    | -3.79 |
| <i>SHC1</i>     | 0.080768256 | 1.67  |

|                |             |        |
|----------------|-------------|--------|
| <i>SHC3</i>    | 0.000463481 | -3.90  |
| <i>SIX5</i>    | 0.08623998  | 1.72   |
| <i>SKA2</i>    | 0.087076367 | -1.88  |
| <i>SKIDA1</i>  | 0.020780085 | -2.36  |
| <i>SLC10A4</i> | 0.03146761  | -3.33  |
| <i>SLC12A5</i> | 0.000532293 | -3.58  |
| <i>SLC15A2</i> | 0.002739031 | 2.93   |
| <i>SLC16A4</i> | 8.15E-06    | 4.50   |
| <i>SLC17A6</i> | 3.23E-15    | -6.86  |
| <i>SLC17A7</i> | 0.016473488 | -2.38  |
| <i>SLC1A2</i>  | 3.13E-05    | -3.93  |
| <i>SLC22A3</i> | 0.007992573 | 2.08   |
| <i>SLC24A2</i> | 0.019007684 | 5.56   |
| <i>SLC27A2</i> | 0.001195573 | -13.43 |
| <i>SLC2A10</i> | 0.07900968  | 1.71   |
| <i>SLC2A3</i>  | 0.000696427 | -2.71  |
| <i>SLC43A1</i> | 0.058730866 | 2.60   |
| <i>SLC6A15</i> | 0.015131541 | -3.27  |
| <i>SLC7A11</i> | 0.033256762 | 2.08   |
| <i>SLC7A14</i> | 3.78E-05    | -4.32  |
| <i>SLC7A2</i>  | 0.006411678 | 2.50   |
| <i>SLC8A1</i>  | 0.000578882 | -3.13  |
| <i>SLIT1</i>   | 8.87E-06    | -4.49  |
| <i>SLITRK1</i> | 1.13E-10    | -5.96  |
| <i>SMAP2</i>   | 0.040866033 | -2.15  |
| <i>SNAP23</i>  | 0.038879915 | 2.08   |
| <i>SNAP91</i>  | 1.79E-12    | -4.98  |
| <i>SNCA</i>    | 0.019743561 | -3.54  |
| <i>SNCB</i>    | 4.57E-09    | -5.98  |
| <i>SNTB2</i>   | 0.098920341 | 1.81   |
| <i>SNX9</i>    | 0.033985927 | 1.86   |
| <i>SOCS2</i>   | 0.020164056 | -2.39  |
| <i>SOSTDC1</i> | 0.000197221 | 3.37   |
| <i>SOX2</i>    | 0.0108565   | -2.56  |
| <i>SOX21</i>   | 0.003342096 | -2.42  |
| <i>SOX5</i>    | 0.032392317 | -2.21  |

|                |             |        |
|----------------|-------------|--------|
| <i>SOX8</i>    | 0.075232112 | 1.70   |
| <i>SPATS2L</i> | 0.001237168 | 2.79   |
| <i>SPSB4</i>   | 0.006609018 | -3.35  |
| <i>SPTBN4</i>  | 0.008523499 | -3.94  |
| <i>SREBF1</i>  | 0.075474147 | 1.63   |
| <i>SSTR2</i>   | 0.005575817 | -2.98  |
| <i>ST18</i>    | 5.09E-05    | -2.46  |
| <i>STK3</i>    | 0.077817883 | 2.02   |
| <i>STK32B</i>  | 0.001794726 | 3.67   |
| <i>STK39</i>   | 0.059159574 | -2.08  |
| <i>STMN2</i>   | 2.03E-09    | -4.97  |
| <i>STMN4</i>   | 1.08E-17    | -7.44  |
| <i>STX1A</i>   | 0.007726345 | -2.81  |
| <i>STXBPI</i>  | 7.47E-05    | -3.31  |
| <i>STXBPSL</i> | 0.043166502 | -1.91  |
| <i>SULT4A1</i> | 0.002533102 | -3.04  |
| <i>SUMF1</i>   | 0.036659671 | 1.90   |
| <i>SV2A</i>    | 0.053682826 | -2.09  |
| <i>SVIL</i>    | 7.74E-06    | 3.98   |
| <i>SYBU</i>    | 0.000301755 | -2.95  |
| <i>SYN3</i>    | 0.003530721 | -2.84  |
| <i>SYNGR2</i>  | 0.010329365 | 2.33   |
| <i>SYNGR3</i>  | 1.25E-10    | -5.52  |
| <i>SYT1</i>    | 5.94E-06    | -3.67  |
| <i>SYT3</i>    | 0.003051398 | -2.84  |
| <i>SYT5</i>    | 1.38E-06    | -5.36  |
| <i>SYT7</i>    | 0.019877849 | -2.16  |
| <i>TEAD2</i>   | 0.012697126 | 2.12   |
| <i>TEKT2</i>   | 0.067546159 | -3.46  |
| <i>TGFB3</i>   | 2.40E-06    | 3.74   |
| <i>TH</i>      | 0.000980297 | -13.61 |
| <i>THBS1</i>   | 0.004020437 | 2.16   |
| <i>THSD4</i>   | 0.050511603 | -2.08  |
| <i>THSD7A</i>  | 0.013379292 | -2.69  |
| <i>TMEFF2</i>  | 0.001167317 | -4.16  |
| <i>TMEM100</i> | 0.014787056 | 1.82   |

|                 |             |        |
|-----------------|-------------|--------|
| <i>TMEM170B</i> | 0.002447445 | -2.36  |
| <i>TMEM39A</i>  | 0.011918424 | 2.24   |
| <i>TMOD2</i>    | 0.001735375 | -2.65  |
| <i>TMTC1</i>    | 3.55E-11    | 7.22   |
| <i>TNFAIP6</i>  | 0.000264084 | 4.17   |
| <i>TNIK</i>     | 0.080689227 | -2.00  |
| <i>TNS3</i>     | 0.042410222 | 1.73   |
| <i>TOP2A</i>    | 0.082327583 | -1.86  |
| <i>TOX</i>      | 2.76E-05    | -3.85  |
| <i>TP53</i>     | 0.087076367 | 1.74   |
| <i>TPPP</i>     | 1.62E-07    | -4.06  |
| <i>TRAM2</i>    | 0.000251705 | 2.89   |
| <i>TRIM2</i>    | 0.018795399 | -2.37  |
| <i>TRIM46</i>   | 0.087357961 | -2.42  |
| <i>TRIM67</i>   | 2.32E-18    | -5.76  |
| <i>TRIM9</i>    | 0.021616902 | -2.58  |
| <i>TRIP6</i>    | 0.00445933  | 2.19   |
| <i>TRPS1</i>    | 0.018739683 | 1.95   |
| <i>TRPV2</i>    | 0.084657198 | -5.09  |
| <i>TSPYL4</i>   | 0.074107166 | -1.97  |
| <i>TUBB6</i>    | 0.033804754 | 1.84   |
| <i>UNC13A</i>   | 3.42E-09    | -4.67  |
| <i>UNC5A</i>    | 1.31E-08    | -6.23  |
| <i>VAMP2</i>    | 0.004198136 | -2.55  |
| <i>VATIL</i>    | 0.050214021 | -2.48  |
| <i>VAV2</i>     | 0.032706336 | -2.22  |
| <i>VEPH1</i>    | 0.010334734 | -3.40  |
| <i>WASF1</i>    | 0.043704124 | -2.09  |
| <i>WDR17</i>    | 0.006117981 | -2.43  |
| <i>WIPI1</i>    | 0.069534545 | 1.81   |
| <i>WNT5A</i>    | 0.007459924 | 2.27   |
| <i>WNT7B</i>    | 4.08E-18    | -12.72 |
| <i>WWTR1</i>    | 1.96E-05    | 3.38   |
| <i>XPR1</i>     | 0.000887513 | -3.09  |
| <i>YAPI</i>     | 0.040393581 | 2.01   |
| <i>YPEL4</i>    | 0.036887419 | -2.66  |

|                 |             |         |
|-----------------|-------------|---------|
| <i>ZCCHC24</i>  | 0.003506095 | 2.34    |
| <i>ZNF536</i>   | 0.038668336 | -2.12   |
| <i>ZNF558</i>   | 0.008184637 | -3.88   |
| <i>ZNF608</i>   | 0.065497212 | -2.08   |
| <i>ZNF667</i>   | 3.70E-05    | 9.48    |
| <i>ZSWIM5</i>   | 6.88E-06    | -3.60   |
| <i>AARD</i>     | 0.050576525 | -6.83   |
| <i>ABCA3</i>    | 0.035431542 | -2.17   |
| <i>ABCA8</i>    | 0.000139798 | 2.88    |
| <i>ABCB1</i>    | 1.13E-06    | -8.69   |
| <i>ABCC3</i>    | 0.062286455 | -4.98   |
| <i>ABI3BP</i>   | 0.0195545   | 1.94    |
| <i>ABRA</i>     | 1.16E-05    | 78.63   |
| <i>ACBD7</i>    | 0.001428797 | -3.31   |
| <i>ACPL2</i>    | 0.011881987 | -2.52   |
| <i>ACTC1</i>    | 4.98E-10    | 74.04   |
| <i>ADAMTS1</i>  | 0.009372033 | 2.11    |
| <i>ADAMTS14</i> | 7.94E-10    | 6.29    |
| <i>ADAMTS17</i> | 5.92E-05    | 5.65    |
| <i>ADAMTS9</i>  | 0.040262621 | 1.97    |
| <i>ADAP2</i>    | 0.04374308  | -5.76   |
| <i>ADCY7</i>    | 0.036687615 | -2.18   |
| <i>ADD2</i>     | 6.35E-08    | -6.36   |
| <i>ADM2</i>     | 0.032313375 | 2.17    |
| <i>ADPRHL1</i>  | 0.003427511 | 8.35    |
| <i>ADRB2</i>    | 0.035007032 | 3.77    |
| <i>ADRBK2</i>   | 0.092942757 | -1.92   |
| <i>AFF3</i>     | 0.099669827 | -1.80   |
| <i>AGMO</i>     | 0.026339597 | 7.08    |
| <i>AGR3</i>     | 0.038916164 | -101.33 |
| <i>AGT</i>      | 0.096905986 | 1.60    |
| <i>AGXT</i>     | 0.04374308  | 8.80    |
| <i>AHCY</i>     | 0.002110749 | 2.51    |
| <i>AHR</i>      | 0.020870555 | 1.95    |
| <i>AKI</i>      | 0.047342986 | 1.81    |
| <i>AKAP12</i>   | 0.002971482 | -2.87   |

|                  |             |        |
|------------------|-------------|--------|
| <i>AKAP5</i>     | 0.033102995 | -2.77  |
| <i>AKAP6</i>     | 0.038760505 | -1.96  |
| <i>AKR1B1</i>    | 0.036687615 | 1.84   |
| <i>AKR1C3</i>    | 0.012449907 | 2.53   |
| <i>ALDH1B1</i>   | 0.009126212 | 2.40   |
| <i>ALDH5A1</i>   | 0.031704884 | -2.04  |
| <i>AMIGO1</i>    | 0.023524892 | -2.60  |
| <i>AMN1</i>      | 0.003126531 | -3.05  |
| <i>AMOTL2</i>    | 0.087076367 | 1.67   |
| <i>AMPD1</i>     | 0.095240604 | 8.65   |
| <i>ANGPTL2</i>   | 0.002431428 | 2.51   |
| <i>ANKRD29</i>   | 0.005561956 | 4.21   |
| <i>ANKRD35</i>   | 0.048680362 | -6.06  |
| <i>ANKRD46</i>   | 0.018957652 | -2.33  |
| <i>ANKS1B</i>    | 0.03973398  | -2.82  |
| <i>ANO6</i>      | 0.049397113 | 2.09   |
| <i>ANPEP</i>     | 0.000662215 | 4.95   |
| <i>ANXA1</i>     | 0.000368535 | 2.56   |
| <i>ANXA11</i>    | 0.000481673 | 2.85   |
| <i>ANXA3</i>     | 0.021616439 | -13.81 |
| <i>AP3B1</i>     | 0.021240266 | 2.01   |
| <i>AP3B2</i>     | 6.48E-08    | -4.95  |
| <i>APBA2</i>     | 0.065497212 | -2.13  |
| <i>APBB3</i>     | 0.057836947 | -2.41  |
| <i>APC2</i>      | 0.000170621 | -3.24  |
| <i>APLN</i>      | 0.079226702 | 3.32   |
| <i>AQP1</i>      | 5.14E-05    | 3.57   |
| <i>ARAP3</i>     | 0.092473971 | -2.38  |
| <i>ARG1</i>      | 0.050092741 | -7.61  |
| <i>ARHGAP10</i>  | 0.002673738 | 5.38   |
| <i>ARHGAP21</i>  | 0.001908863 | -2.88  |
| <i>ARHGAP24</i>  | 0.000249084 | 3.36   |
| <i>ARHGAP28</i>  | 0.056112204 | 2.62   |
| <i>ARHGAP33</i>  | 7.37E-07    | -4.18  |
| <i>ARHGAP8</i>   | 0.005947486 | -5.10  |
| <i>ARHGEF10L</i> | 0.084442911 | -2.19  |

|                 |             |         |
|-----------------|-------------|---------|
| <i>ARHGEF2</i>  | 0.007524571 | 2.21    |
| <i>ARHGEF4</i>  | 0.096995131 | -1.96   |
| <i>ARL4C</i>    | 0.048826316 | -2.24   |
| <i>ARNT2</i>    | 0.040854324 | -1.98   |
| <i>ARRB2</i>    | 0.061304751 | -2.12   |
| <i>ARSJ</i>     | 0.000431205 | 3.86    |
| <i>ASGR1</i>    | 0.064890225 | -3.10   |
| <i>ASIC4</i>    | 0.001222007 | -3.47   |
| <i>ASS1</i>     | 0.033922836 | 1.73    |
| <i>ASTN1</i>    | 0.097795043 | -1.72   |
| <i>ATAT1</i>    | 0.001339306 | -2.70   |
| <i>ATCAY</i>    | 6.33E-05    | -3.30   |
| <i>ATG9B</i>    | 6.35E-05    | -15.04  |
| <i>ATOH7</i>    | 0.008922508 | -8.97   |
| <i>ATP13A2</i>  | 0.09920535  | -1.99   |
| <i>ATP6V0A1</i> | 0.080110588 | -1.96   |
| <i>ATP8B3</i>   | 0.003551215 | -4.90   |
| <i>ATRNL1</i>   | 0.002375382 | -2.59   |
| <i>ATXN8OS</i>  | 0.02590021  | -9.33   |
| <i>AVP</i>      | 0.009664283 | -101.33 |
| <i>AZGP1</i>    | 0.003927563 | -24.09  |
| <i>B3GALT2</i>  | 0.018738455 | -2.90   |
| <i>B3GAT1</i>   | 0.001049373 | -2.63   |
| <i>B3GNT4</i>   | 0.006462217 | -6.50   |
| <i>B4GALNT3</i> | 0.001827511 | 2.66    |
| <i>B4GALT1</i>  | 1.49E-06    | 3.73    |
| <i>BAG2</i>     | 0.002956507 | 3.46    |
| <i>BALAP2L1</i> | 0.001989562 | 4.07    |
| <i>BALAP3</i>   | 0.039701501 | -2.06   |
| <i>BARX1</i>    | 0.000673931 | 4.24    |
| <i>BASP1</i>    | 0.060272216 | -2.41   |
| <i>BCL11A</i>   | 0.08413548  | -3.14   |
| <i>BDKRB2</i>   | 2.39E-08    | 5.59    |
| <i>BHLHE23</i>  | 0.036327258 | -7.72   |
| <i>BHLHE40</i>  | 0.001624423 | -2.84   |
| <i>BHMT</i>     | 0.006439415 | -11.71  |

|                  |             |        |
|------------------|-------------|--------|
| <i>BIRC7</i>     | 0.052660411 | -10.45 |
| <i>BLCAP</i>     | 0.032548511 | 2.18   |
| <i>BMP1</i>      | 0.002751397 | 2.37   |
| <i>BMP5</i>      | 0.005606598 | 2.56   |
| <i>BNC1</i>      | 0.023464383 | 6.82   |
| <i>BNIP3</i>     | 1.97E-07    | -3.96  |
| <i>BPIFB4</i>    | 0.089450151 | 16.88  |
| <i>BRSK1</i>     | 0.00053606  | -3.16  |
| <i>BRSK2</i>     | 0.005397448 | -2.50  |
| <i>BSN</i>       | 4.59E-12    | -4.99  |
| <i>BTNL9</i>     | 0.00143586  | -5.80  |
| <i>BVES</i>      | 0.002206614 | 2.62   |
| <i>BZRAP1</i>    | 2.54E-05    | -3.76  |
| <i>C10orf10</i>  | 0.002804654 | 4.19   |
| <i>C10orf82</i>  | 0.018705371 | -10.76 |
| <i>C11orf35</i>  | 1.17E-05    | -6.16  |
| <i>C12orf42</i>  | 0.001090023 | 28.68  |
| <i>C12orf49</i>  | 0.04541411  | -1.94  |
| <i>C15orf59</i>  | 0.068851012 | -2.38  |
| <i>C17orf102</i> | 0.019657283 | -4.79  |
| <i>C1orf21</i>   | 0.016797455 | -2.27  |
| <i>C1orf61</i>   | 0.00047423  | -3.09  |
| <i>C1orf94</i>   | 0.061428385 | -9.37  |
| <i>C1QL4</i>     | 0.000176813 | -3.32  |
| <i>C20orf112</i> | 3.12E-05    | -3.45  |
| <i>C2orf80</i>   | 0.002906484 | -3.66  |
| <i>C3orf52</i>   | 0.043774909 | 3.39   |
| <i>C4orf17</i>   | 0.074950938 | 9.67   |
| <i>C5orf30</i>   | 0.010629284 | -2.45  |
| <i>C5orf38</i>   | 0.021895364 | -3.69  |
| <i>C5orf64</i>   | 0.00126146  | -13.60 |
| <i>C6orf1</i>    | 0.056207452 | -2.66  |
| <i>C6orf106</i>  | 0.065384426 | 1.82   |
| <i>C6orf48</i>   | 0.025590325 | 1.92   |
| <i>C9orf135</i>  | 0.07237579  | -8.07  |
| <i>CA12</i>      | 0.000926006 | -3.10  |

|                 |             |        |
|-----------------|-------------|--------|
| <i>CA9</i>      | 2.59E-05    | -5.98  |
| <i>CABP1</i>    | 0.07304897  | -4.14  |
| <i>CACNA1I</i>  | 0.036687615 | -2.76  |
| <i>CACNA2D4</i> | 0.065325558 | 5.55   |
| <i>CADM4</i>    | 0.096466675 | -2.09  |
| <i>CAMK2N2</i>  | 8.68E-06    | -3.95  |
| <i>CAMSAP2</i>  | 0.075232112 | -1.94  |
| <i>CARNS1</i>   | 0.00173417  | 5.06   |
| <i>CASP4</i>    | 0.060194627 | 4.39   |
| <i>CASP7</i>    | 0.037152514 | 1.92   |
| <i>CASZ1</i>    | 0.005317884 | 4.11   |
| <i>CATSPERG</i> | 0.070190562 | -2.88  |
| <i>CCDC113</i>  | 0.071589305 | -2.13  |
| <i>CCDC136</i>  | 0.007726345 | -2.62  |
| <i>CCDC3</i>    | 0.000315561 | 3.33   |
| <i>CCDC33</i>   | 0.024249962 | -6.86  |
| <i>CCDC69</i>   | 0.000213043 | 3.63   |
| <i>CCDC8</i>    | 0.001479499 | 2.46   |
| <i>CCDC88B</i>  | 0.006588591 | -4.89  |
| <i>CCDC88C</i>  | 0.003831956 | -2.38  |
| <i>CCL11</i>    | 0.08413548  | 416.25 |
| <i>CCL20</i>    | 0.007621317 | -32.72 |
| <i>CCNA1</i>    | 0.013080719 | -5.92  |
| <i>CCNG1</i>    | 0.084291393 | 1.69   |
| <i>CCNG2</i>    | 0.009896302 | 2.27   |
| <i>CCSAP</i>    | 0.025851322 | -2.27  |
| <i>CD109</i>    | 0.078546589 | 1.86   |
| <i>CD164</i>    | 0.021404556 | 2.14   |
| <i>CD2</i>      | 0.005283972 | 25.09  |
| <i>CD200</i>    | 7.74E-06    | -3.62  |
| <i>CD248</i>    | 4.73E-12    | 6.26   |
| <i>CD34</i>     | 0.000194267 | 5.78   |
| <i>CD44</i>     | 0.003880114 | 2.03   |
| <i>CD8A</i>     | 0.058082733 | -4.58  |
| <i>CDC42BPG</i> | 0.014120152 | -4.81  |
| <i>CDH2</i>     | 0.007524571 | -2.43  |

|               |             |        |
|---------------|-------------|--------|
| <i>CDHR1</i>  | 0.040637196 | -2.85  |
| <i>CDHR2</i>  | 0.010479103 | -5.86  |
| <i>CDHR3</i>  | 0.016969685 | -2.87  |
| <i>CDKN1C</i> | 1.32E-06    | 5.66   |
| <i>CDKN2D</i> | 6.48E-07    | -4.49  |
| <i>CEBPA</i>  | 0.000329685 | 3.46   |
| <i>CECR6</i>  | 0.001393386 | -3.21  |
| <i>CELF3</i>  | 1.15E-17    | -6.72  |
| <i>CELF4</i>  | 1.61E-12    | -6.14  |
| <i>CELF5</i>  | 9.05E-06    | -3.93  |
| <i>CELF6</i>  | 0.009611063 | -3.16  |
| <i>CELSR2</i> | 0.007726345 | -2.29  |
| <i>CELSR3</i> | 0.006647446 | -2.48  |
| <i>CENPV</i>  | 0.00550658  | -3.15  |
| <i>CERCAM</i> | 0.027703153 | 1.88   |
| <i>CFHR3</i>  | 0.019394119 | 82.25  |
| <i>CFL2</i>   | 0.087807028 | 1.76   |
| <i>CHAT</i>   | 0.008939553 | -7.32  |
| <i>CHCHD6</i> | 0.095985357 | -2.46  |
| <i>CHML</i>   | 0.020312561 | -2.36  |
| <i>CHMP3</i>  | 0.083673745 | 1.65   |
| <i>CHRD</i>   | 0.003943353 | 2.29   |
| <i>CHRNA2</i> | 1.10E-18    | -31.90 |
| <i>CHRNA5</i> | 0.093576045 | -2.44  |
| <i>CHRNA6</i> | 0.003495279 | -20.21 |
| <i>CHRNB2</i> | 1.62E-06    | -3.97  |
| <i>CHRNB4</i> | 3.00E-05    | -6.35  |
| <i>CHST8</i>  | 0.00309472  | -5.82  |
| <i>CHSY1</i>  | 0.025556971 | 2.02   |
| <i>CILP2</i>  | 0.03286606  | -2.44  |
| <i>CKAP4</i>  | 0.07716856  | 1.81   |
| <i>CLASP2</i> | 0.001975993 | -2.71  |
| <i>CLDN19</i> | 0.037371683 | -23.27 |
| <i>CLDN3</i>  | 0.000294016 | -19.04 |
| <i>CLEC1A</i> | 0.029330483 | 6.83   |
| <i>CLEC3B</i> | 0.09094893  | 6.56   |

|                 |             |       |
|-----------------|-------------|-------|
| <i>CMIP</i>     | 0.040656663 | -2.06 |
| <i>CMKLR1</i>   | 5.81E-05    | 3.21  |
| <i>CMTM7</i>    | 0.074168801 | 2.84  |
| <i>CNGA3</i>    | 0.054719489 | -2.45 |
| <i>COL12A1</i>  | 0.000221499 | 3.08  |
| <i>COL14A1</i>  | 8.98E-06    | 6.67  |
| <i>COL16A1</i>  | 3.67E-10    | 4.73  |
| <i>COL21A1</i>  | 3.28E-10    | 6.48  |
| <i>COL23A1</i>  | 0.022465688 | 1.89  |
| <i>COL24A1</i>  | 0.000201401 | 3.21  |
| <i>COL26A1</i>  | 0.075687379 | 1.85  |
| <i>COL5A1</i>   | 0.015410964 | 3.25  |
| <i>COL5A2</i>   | 0.09983487  | 2.04  |
| <i>COL5A3</i>   | 3.03E-06    | 3.92  |
| <i>COL6A3</i>   | 0.00179205  | 5.14  |
| <i>COLEC12</i>  | 0.001070009 | 2.36  |
| <i>COLGALT2</i> | 1.93E-05    | 3.93  |
| <i>CORO2B</i>   | 0.00349003  | -2.71 |
| <i>CORO7</i>    | 0.02193309  | 1.93  |
| <i>COTL1</i>    | 0.023984908 | -2.23 |
| <i>CPLX3</i>    | 0.08503098  | -4.71 |
| <i>CPNE7</i>    | 0.084291393 | -3.79 |
| <i>CPNE9</i>    | 0.003195994 | -8.20 |
| <i>CPVL</i>     | 0.002611392 | 2.75  |
| <i>CPZ</i>      | 0.035565759 | 3.24  |
| <i>CRB2</i>     | 0.081563961 | -1.66 |
| <i>CREB3L1</i>  | 0.001636752 | 2.52  |
| <i>CREB3L2</i>  | 0.025050638 | 1.97  |
| <i>CREB5</i>    | 0.050706819 | -1.88 |
| <i>CREG2</i>    | 0.006185163 | -3.37 |
| <i>CRHBP</i>    | 0.038772185 | -5.82 |
| <i>CRHR2</i>    | 0.002138403 | -8.36 |
| <i>CRISPLD2</i> | 1.48E-07    | 4.23  |
| <i>CRTAP</i>    | 0.024881085 | 2.08  |
| <i>CSPG4</i>    | 0.000482117 | 2.74  |
| <i>CTDSPL</i>   | 0.019430795 | 2.42  |

|                  |             |         |
|------------------|-------------|---------|
| <i>CTNNA2</i>    | 0.007072808 | -2.24   |
| <i>CTNND2</i>    | 1.57E-05    | -3.50   |
| <i>CTSK</i>      | 8.52E-07    | 4.02    |
| <i>CUBN</i>      | 0.002189761 | -4.35   |
| <i>CXCL12</i>    | 0.002699786 | 7.97    |
| <i>CXXC11</i>    | 4.83E-08    | -46.35  |
| <i>CXXC4</i>     | 0.023374608 | -2.65   |
| <i>CYB561A3</i>  | 0.052660411 | 2.14    |
| <i>CYB5R1</i>    | 1.23E-06    | 3.63    |
| <i>CYP11B1</i>   | 5.11E-05    | 3.33    |
| <i>CYP2S1</i>    | 0.023943968 | -4.30   |
| <i>CYTIP</i>     | 0.030123106 | 12.11   |
| <i>DAAMI</i>     | 0.001471119 | -2.71   |
| <i>DACT2</i>     | 0.073656698 | -3.52   |
| <i>DDC</i>       | 0.035850899 | -3.50   |
| <i>DDR2</i>      | 0.001593539 | 2.89    |
| <i>DEFB1</i>     | 0.029366604 | -101.33 |
| <i>DENND1C</i>   | 0.011219084 | -3.88   |
| <i>DEPTOR</i>    | 0.049066718 | 1.84    |
| <i>DGKI</i>      | 0.021598665 | -2.47   |
| <i>DHRS13</i>    | 0.040413867 | -2.57   |
| <i>DHRS2</i>     | 0.061513539 | -3.98   |
| <i>DIRAS3</i>    | 0.003104966 | 2.22    |
| <i>DKK2</i>      | 0.002120238 | 4.29    |
| <i>DLG1</i>      | 0.086013718 | 1.72    |
| <i>DLGAP3</i>    | 0.000983191 | -4.40   |
| <i>DLL4</i>      | 0.062733793 | -3.93   |
| <i>DLX3</i>      | 0.036915053 | 9.48    |
| <i>DMPK</i>      | 6.72E-05    | 3.00    |
| <i>DNAJC21</i>   | 0.045409319 | 2.00    |
| <i>DNAJC22</i>   | 0.089294738 | -3.60   |
| <i>DNMT3B</i>    | 0.005244172 | -3.29   |
| <i>DPT</i>       | 9.52E-05    | 3.60    |
| <i>DPY19L2P2</i> | 0.053054321 | -4.14   |
| <i>DPYD</i>      | 0.054285586 | 1.98    |
| <i>DPYSL4</i>    | 0.086803056 | -2.01   |

|                |             |        |
|----------------|-------------|--------|
| <i>DPYSL5</i>  | 0.013498837 | -2.78  |
| <i>DQX1</i>    | 0.004045201 | -13.71 |
| <i>DRD4</i>    | 0.057305181 | -4.61  |
| <i>DSE</i>     | 0.000275742 | 3.02   |
| <i>DTX3</i>    | 0.078706241 | -2.12  |
| <i>DTX4</i>    | 0.00118962  | -2.61  |
| <i>DUOX1</i>   | 0.026467147 | -3.21  |
| <i>DUOX2</i>   | 1.36E-05    | -9.83  |
| <i>DUSP1</i>   | 0.007685373 | 2.29   |
| <i>DUSP13</i>  | 2.34E-05    | 27.21  |
| <i>DUSP5</i>   | 0.025998147 | -3.08  |
| <i>DUSP8</i>   | 6.45E-11    | -5.06  |
| <i>ECM2</i>    | 0.008801076 | 3.92   |
| <i>EDN1</i>    | 0.000678613 | -19.26 |
| <i>EDNRA</i>   | 1.66E-11    | 6.06   |
| <i>EEF1D</i>   | 0.045179553 | 1.70   |
| <i>EFEMP1</i>  | 0.000641541 | 2.37   |
| <i>EFNB2</i>   | 0.000652306 | -3.07  |
| <i>EFR3B</i>   | 0.000438654 | -2.61  |
| <i>EGFL7</i>   | 0.094717194 | 1.53   |
| <i>EHD2</i>    | 0.012609085 | 2.02   |
| <i>EIF3E</i>   | 0.037062674 | 2.00   |
| <i>EIF4E1B</i> | 0.032548511 | -7.75  |
| <i>ELAVL2</i>  | 0.00041246  | -2.87  |
| <i>ELAVL3</i>  | 1.78E-16    | -7.14  |
| <i>ELMSAN1</i> | 0.054350814 | 1.86   |
| <i>ELN</i>     | 0.001212065 | 2.74   |
| <i>ELOVL1</i>  | 0.048219253 | 1.94   |
| <i>ELOVL2</i>  | 0.005411215 | -2.46  |
| <i>EMILIN1</i> | 0.00978521  | 1.97   |
| <i>EMILIN2</i> | 0.002185448 | 3.31   |
| <i>EMILIN3</i> | 0.007915656 | 2.63   |
| <i>EMP3</i>    | 0.073218117 | 1.63   |
| <i>EMX2OS</i>  | 0.026508943 | 2.17   |
| <i>EN1</i>     | 0.008922508 | -3.28  |
| <i>ENG</i>     | 0.000322629 | 3.75   |

|                 |             |        |
|-----------------|-------------|--------|
| <i>ENPP1</i>    | 0.000427796 | 4.03   |
| <i>ENPP2</i>    | 0.03481198  | 2.09   |
| <i>ENPP6</i>    | 5.21E-05    | 6.83   |
| <i>EPAS1</i>    | 0.055789952 | -2.57  |
| <i>EPHA10</i>   | 0.058168121 | -5.39  |
| <i>EPS8L1</i>   | 0.002563121 | -5.89  |
| <i>EPS8L2</i>   | 0.005623458 | -4.74  |
| <i>ERBB3</i>    | 0.079226702 | 4.11   |
| <i>EROIL</i>    | 0.023460653 | -2.22  |
| <i>ESRRA</i>    | 0.068317651 | 1.98   |
| <i>ESYT1</i>    | 0.007726345 | 2.24   |
| <i>ESYT3</i>    | 0.068880696 | 2.29   |
| <i>EVC</i>      | 0.054476839 | 1.84   |
| <i>EVL</i>      | 0.001599798 | -2.81  |
| <i>EYAI</i>     | 0.005669618 | 3.40   |
| <i>F11R</i>     | 0.027970741 | -2.26  |
| <i>F2RL1</i>    | 0.098592244 | -2.40  |
| <i>F2RL2</i>    | 8.93E-05    | 3.35   |
| <i>FABP6</i>    | 0.00094343  | -28.81 |
| <i>FADS6</i>    | 0.001417857 | -9.65  |
| <i>FAM101B</i>  | 0.015074906 | 2.33   |
| <i>FAM109B</i>  | 0.008560903 | -15.11 |
| <i>FAM114A1</i> | 0.020654393 | 2.09   |
| <i>FAM117B</i>  | 0.000384104 | -2.96  |
| <i>FAM120A</i>  | 0.018478926 | 2.07   |
| <i>FAM126B</i>  | 0.018957652 | -2.39  |
| <i>FAM129A</i>  | 0.002872813 | 2.34   |
| <i>FAM131B</i>  | 6.83E-05    | -3.24  |
| <i>FAM163B</i>  | 0.008751485 | -7.07  |
| <i>FAM219A</i>  | 0.000292927 | -3.17  |
| <i>FAM26E</i>   | 0.017013079 | 3.58   |
| <i>FAM43A</i>   | 0.035601503 | 1.83   |
| <i>FAS</i>      | 0.000328907 | 3.11   |
| <i>FAXC</i>     | 3.98E-07    | -5.41  |
| <i>FBXL16</i>   | 0.001339306 | -2.94  |
| <i>FBXO10</i>   | 0.001220812 | 2.74   |

|               |             |         |
|---------------|-------------|---------|
| <i>FBXO21</i> | 0.074255908 | -1.97   |
| <i>FBXO40</i> | 0.007945721 | 28.63   |
| <i>FBXO41</i> | 3.03E-05    | -3.40   |
| <i>FBXW4</i>  | 0.053682826 | 2.33    |
| <i>FCGRT</i>  | 0.027206467 | 1.85    |
| <i>FCHO1</i>  | 0.009525841 | -2.80   |
| <i>FDCSP</i>  | 0.030179788 | -12.00  |
| <i>FGF10</i>  | 0.005108568 | 3.74    |
| <i>FGF17</i>  | 0.072206562 | -4.28   |
| <i>FGF19</i>  | 0.001248933 | -10.77  |
| <i>FGF7</i>   | 8.63E-09    | 8.72    |
| <i>FGFBP1</i> | 0.036902005 | 9.32    |
| <i>FGFR4</i>  | 0.000203161 | 3.44    |
| <i>FIBCD1</i> | 2.68E-05    | -7.13   |
| <i>FKBP7</i>  | 0.000604137 | 2.69    |
| <i>FLNC</i>   | 3.10E-05    | 4.73    |
| <i>FLRT1</i>  | 0.03286606  | -2.43   |
| <i>FLVCR2</i> | 0.001518322 | 4.54    |
| <i>FMN2</i>   | 0.070115801 | -1.69   |
| <i>FN3K</i>   | 0.07599492  | -2.56   |
| <i>FNBP1L</i> | 0.038846536 | -2.28   |
| <i>FOLH1</i>  | 0.068261035 | -6.76   |
| <i>FOXC1</i>  | 0.049160858 | 2.28    |
| <i>FOXF1</i>  | 0.084779461 | 2.63    |
| <i>FO XK1</i> | 0.075687379 | -1.73   |
| <i>FRMD4A</i> | 0.038301741 | -2.11   |
| <i>FRMD5</i>  | 0.003451915 | -4.30   |
| <i>FRZB</i>   | 0.000759082 | 2.71    |
| <i>FSHR</i>   | 0.004567331 | 45.67   |
| <i>FUT3</i>   | 0.00035136  | -13.84  |
| <i>FUT5</i>   | 0.004146977 | -12.34  |
| <i>FXYD3</i>  | 0.002227098 | -101.33 |
| <i>FYCO1</i>  | 2.43E-05    | 3.23    |
| <i>FZD10</i>  | 0.061218153 | 2.45    |
| <i>FZD3</i>   | 0.007726345 | -2.13   |
| <i>FZD4</i>   | 0.026774219 | 2.03    |

|                |             |         |
|----------------|-------------|---------|
| <i>FZD5</i>    | 0.086238313 | -2.52   |
| <i>GABRD</i>   | 0.074484467 | -4.78   |
| <i>GAD2</i>    | 0.011005476 | -2.83   |
| <i>GADL1</i>   | 0.038760505 | 11.79   |
| <i>GALNS</i>   | 0.046791324 | 1.94    |
| <i>GALNT12</i> | 0.07599492  | -3.20   |
| <i>GALNT9</i>  | 0.011132686 | -4.05   |
| <i>GALP</i>    | 0.004555918 | -101.33 |
| <i>GAP43</i>   | 0.004976518 | -3.24   |
| <i>GAS5</i>    | 0.026455557 | 2.03    |
| <i>GBP5</i>    | 0.014542826 | 15.53   |
| <i>GCK</i>     | 0.070640066 | -3.47   |
| <i>GDAP1L1</i> | 5.05E-07    | -4.27   |
| <i>GDF6</i>    | 0.008356201 | 3.53    |
| <i>GGTAIP</i>  | 4.06E-09    | 15.74   |
| <i>GHR</i>     | 0.081563961 | 2.79    |
| <i>GIT1</i>    | 0.099621849 | -1.98   |
| <i>GJA5</i>    | 0.011881987 | 12.88   |
| <i>GLB1L2</i>  | 0.01572579  | -2.47   |
| <i>GLS2</i>    | 0.004979682 | -4.39   |
| <i>GLT8D2</i>  | 4.27E-11    | 6.15    |
| <i>GLTPD2</i>  | 0.06321316  | -4.77   |
| <i>GLYATL1</i> | 0.034852601 | -5.47   |
| <i>GMPPA</i>   | 0.08338071  | 1.78    |
| <i>GNG13</i>   | 0.057572474 | -6.93   |
| <i>GNRH1</i>   | 0.055731677 | -9.23   |
| <i>GOLT1A</i>  | 0.028833877 | -9.35   |
| <i>GPC2</i>    | 0.004025222 | -2.50   |
| <i>GPD1L</i>   | 0.025468157 | 1.98    |
| <i>GPM6A</i>   | 0.005107938 | -3.08   |
| <i>GPNMB</i>   | 0.00060291  | 2.47    |
| <i>GPR124</i>  | 9.08E-06    | 3.48    |
| <i>GPR126</i>  | 0.028012163 | -2.66   |
| <i>GPR133</i>  | 4.84E-05    | 6.59    |
| <i>GPR137C</i> | 2.50E-06    | -4.23   |
| <i>GPR141</i>  | 0.072686545 | 24.96   |

|                  |             |        |
|------------------|-------------|--------|
| <i>GPR160</i>    | 0.026412111 | -7.19  |
| <i>GPR56</i>     | 7.91E-05    | -3.13  |
| <i>GPR61</i>     | 0.057753999 | -3.51  |
| <i>GPRC5C</i>    | 0.057943328 | 1.75   |
| <i>GPRIN1</i>    | 1.62E-07    | -4.00  |
| <i>GPRIN2</i>    | 0.040393581 | -3.72  |
| <i>GPRIN3</i>    | 3.26E-05    | -4.14  |
| <i>GRAP</i>      | 0.017646008 | -9.27  |
| <i>GRB7</i>      | 0.035662301 | -9.53  |
| <i>GRIK5</i>     | 0.021399868 | -2.23  |
| <i>GRIN2C</i>    | 0.013000193 | -6.99  |
| <i>GRIN2D</i>    | 8.28E-09    | -4.25  |
| <i>GRIP1</i>     | 0.038473349 | -2.48  |
| <i>GRIP2</i>     | 0.007500416 | -3.47  |
| <i>GSE1</i>      | 0.069312653 | -2.15  |
| <i>GUCA1A</i>    | 1.51E-05    | -11.27 |
| <i>GXYLT2</i>    | 0.002284913 | 2.46   |
| <i>GYG1</i>      | 0.004432938 | 2.16   |
| <i>H6PD</i>      | 0.007104834 | 2.24   |
| <i>HAPLN2</i>    | 0.012565899 | -5.07  |
| <i>HAPLN3</i>    | 0.046286906 | 2.02   |
| <i>HARIA</i>     | 0.00050953  | -7.02  |
| <i>HASI</i>      | 0.003013545 | -10.85 |
| <i>HDAC5</i>     | 0.003387947 | -2.71  |
| <i>HDAC9</i>     | 0.003767484 | -4.37  |
| <i>HERC1</i>     | 0.099621849 | -1.89  |
| <i>HEY2</i>      | 0.014085633 | 2.78   |
| <i>HHATL</i>     | 0.016070334 | 13.77  |
| <i>HHIPL1</i>    | 0.043288216 | -4.87  |
| <i>HID1</i>      | 0.001014717 | -2.82  |
| <i>HIF1AN</i>    | 0.067208744 | 1.85   |
| <i>HILPDA</i>    | 2.02E-07    | -5.05  |
| <i>HIPK3</i>     | 2.66E-05    | 3.47   |
| <i>HIPK4</i>     | 0.000156085 | 16.58  |
| <i>HIST1H2BK</i> | 0.008993051 | 3.40   |
| <i>HKDC1</i>     | 0.008758467 | -5.30  |

|                  |             |         |
|------------------|-------------|---------|
| <i>HLA-DRB1</i>  | 0.099661362 | 4.12    |
| <i>HLX</i>       | 0.000352039 | 5.78    |
| <i>HMCN1</i>     | 0.002152773 | 2.41    |
| <i>HMGAI</i>     | 0.075211712 | -2.02   |
| <i>HMGCR</i>     | 0.089022586 | -1.90   |
| <i>HMGCSI</i>    | 0.047596228 | -2.08   |
| <i>HMP19</i>     | 8.56E-16    | -7.92   |
| <i>HNF4A</i>     | 0.008590251 | -101.33 |
| <i>HOMER3</i>    | 0.097097556 | 1.63    |
| <i>HOXA10</i>    | 0.020238499 | 2.12    |
| <i>HOXA11</i>    | 2.24E-06    | 4.54    |
| <i>HOXA11-AS</i> | 0.021671583 | 4.63    |
| <i>HOXA13</i>    | 0.012011559 | 8.26    |
| <i>HOXB13</i>    | 0.000305335 | 4.89    |
| <i>HOXD13</i>    | 0.007194909 | 4.67    |
| <i>HPX</i>       | 0.002281222 | -8.25   |
| <i>HSD11B1</i>   | 0.055731677 | 37.88   |
| <i>HSDL1</i>     | 0.021240266 | -2.17   |
| <i>HSF4</i>      | 0.064835234 | -2.58   |
| <i>HSPA12B</i>   | 0.072746801 | 2.54    |
| <i>HSPB1</i>     | 0.004249474 | 2.27    |
| <i>HSPG2</i>     | 0.062527336 | 1.79    |
| <i>HTR1E</i>     | 0.024097792 | -6.24   |
| <i>ICMT</i>      | 0.011828489 | 2.09    |
| <i>ICOSLG</i>    | 0.091722393 | 2.34    |
| <i>ID3</i>       | 1.11E-10    | 5.29    |
| <i>IFRD2</i>     | 0.013516808 | 2.18    |
| <i>IGDCC4</i>    | 0.097795043 | 1.64    |
| <i>IGF2R</i>     | 0.010558578 | 2.59    |
| <i>IGFBP4</i>    | 0.071687643 | 6.37    |
| <i>IGFBPL1</i>   | 9.08E-05    | -3.77   |
| <i>IGFL2</i>     | 0.057836947 | -23.33  |
| <i>IGSF10</i>    | 0.098454251 | 1.96    |
| <i>IGSF9</i>     | 3.17E-05    | -4.19   |
| <i>IKZF2</i>     | 0.034820751 | -2.48   |
| <i>IL11</i>      | 0.014901682 | -4.57   |

|                 |             |        |
|-----------------|-------------|--------|
| <i>IL11RA</i>   | 0.034785715 | 1.92   |
| <i>IL1R1</i>    | 2.25E-05    | 3.13   |
| <i>IL4R</i>     | 0.023592653 | 5.19   |
| <i>IL6</i>      | 0.064574859 | -5.80  |
| <i>IL6R</i>     | 0.092187142 | 3.06   |
| <i>IMPA2</i>    | 0.002284913 | 2.71   |
| <i>IMPDH2</i>   | 0.049140498 | 1.89   |
| <i>INPP5D</i>   | 0.061380563 | -4.56  |
| <i>INSL5</i>    | 0.007915656 | -6.72  |
| <i>INSM2</i>    | 0.000715893 | -27.43 |
| <i>IP6K3</i>    | 0.000247862 | 9.33   |
| <i>IPO4</i>     | 0.095613198 | 1.73   |
| <i>IPW</i>      | 0.099730956 | 1.63   |
| <i>IQSEC3</i>   | 6.86E-05    | -6.56  |
| <i>IRS2</i>     | 0.030394706 | -2.15  |
| <i>IRX2</i>     | 0.013746725 | -3.21  |
| <i>IRX6</i>     | 0.062162922 | 4.52   |
| <i>ITGA11</i>   | 0.005358305 | 2.08   |
| <i>ITGA5</i>    | 0.00195641  | 2.40   |
| <i>ITGA8</i>    | 3.00E-06    | 8.20   |
| <i>ITGA9</i>    | 0.072418678 | 2.57   |
| <i>ITGB1</i>    | 0.038568908 | 1.94   |
| <i>ITGB3</i>    | 0.099536982 | 3.18   |
| <i>ITPR1</i>    | 0.003352648 | 2.35   |
| <i>ITPRIPL2</i> | 0.000586276 | 2.92   |
| <i>JAK3</i>     | 0.041438489 | -2.93  |
| <i>JARID2</i>   | 0.012530825 | -2.24  |
| <i>JDP2</i>     | 0.000404662 | 2.66   |
| <i>JPH2</i>     | 0.004512698 | 13.23  |
| <i>KANK2</i>    | 4.28E-05    | 2.93   |
| <i>KANK4</i>    | 7.49E-07    | 4.55   |
| <i>KAZALD1</i>  | 0.013747135 | 3.02   |
| <i>KBTD11</i>   | 0.002077401 | -2.66  |
| <i>KBTD6</i>    | 0.067669586 | -1.97  |
| <i>KCNA5</i>    | 0.07667158  | -4.90  |
| <i>KCNC1</i>    | 0.025970616 | -6.71  |

|                  |             |        |
|------------------|-------------|--------|
| <i>KCNH6</i>     | 0.000396154 | -24.41 |
| <i>KCNH8</i>     | 0.007678249 | -3.32  |
| <i>KCNJ3</i>     | 0.097359548 | -4.23  |
| <i>KCNJ4</i>     | 0.030527788 | -2.47  |
| <i>KCNJ5</i>     | 0.001612959 | -15.02 |
| <i>KCNJ9</i>     | 2.03E-10    | -11.33 |
| <i>KCNK12</i>    | 0.020654393 | -3.31  |
| <i>KCNK15</i>    | 0.001195573 | 5.04   |
| <i>KCNK3</i>     | 0.0195545   | -2.20  |
| <i>KCNS3</i>     | 2.70E-05    | 7.15   |
| <i>KCTD12</i>    | 0.027703153 | 1.95   |
| <i>KCTD7</i>     | 0.060486212 | -2.07  |
| <i>KDELC2</i>    | 0.000708488 | 2.51   |
| <i>KERA</i>      | 0.032074851 | 5.71   |
| <i>KHDC3L</i>    | 0.021861371 | -17.74 |
| <i>KIAA0408</i>  | 2.37E-05    | -3.41  |
| <i>KIAA0895</i>  | 0.064944971 | -2.11  |
| <i>KIAA0895L</i> | 0.025111792 | -2.44  |
| <i>KIAA1147</i>  | 0.00588986  | -2.31  |
| <i>KIAA1467</i>  | 0.002766844 | -2.55  |
| <i>KIAA1549L</i> | 0.014123272 | -2.35  |
| <i>KIAA1644</i>  | 0.03973398  | -2.21  |
| <i>KIAA1804</i>  | 0.008162529 | -3.91  |
| <i>KIAA1958</i>  | 0.018578549 | -2.15  |
| <i>KIF16B</i>    | 0.026669401 | 2.35   |
| <i>KIF1C</i>     | 0.028278038 | 1.93   |
| <i>KIF21A</i>    | 4.12E-05    | -2.94  |
| <i>KIF21B</i>    | 1.15E-11    | -5.55  |
| <i>KIF3A</i>     | 0.004875762 | -2.44  |
| <i>KIF3C</i>     | 1.36E-05    | -3.74  |
| <i>KISS1R</i>    | 5.56E-06    | -8.62  |
| <i>KLF2</i>      | 0.017845142 | 3.33   |
| <i>KLF4</i>      | 2.33E-16    | 9.21   |
| <i>KLF7</i>      | 0.001959665 | -3.72  |
| <i>KLHDC8A</i>   | 0.008776178 | -2.36  |
| <i>KLHL14</i>    | 0.021528919 | -2.90  |

|                   |             |         |
|-------------------|-------------|---------|
| <i>KLHL21</i>     | 0.015740817 | 2.05    |
| <i>KLHL30</i>     | 0.000345588 | 12.06   |
| <i>KLHL32</i>     | 0.055511122 | -2.52   |
| <i>KLHL38</i>     | 0.009460132 | 45.15   |
| <i>KLHL41</i>     | 1.04E-19    | 55.19   |
| <i>KLK6</i>       | 0.052660411 | -101.33 |
| <i>KRT80</i>      | 0.069383005 | 6.98    |
| <i>KRTAP5-1</i>   | 0.001528053 | -12.09  |
| <i>KRTAP5-2</i>   | 0.00204334  | -5.85   |
| <i>KRTAP5-AS1</i> | 1.13E-05    | -6.78   |
| <i>KSR2</i>       | 8.19E-06    | -5.77   |
| <i>L1TD1</i>      | 0.021614863 | 11.38   |
| <i>LAMA2</i>      | 1.27E-11    | 6.68    |
| <i>LAMB1</i>      | 0.016499913 | 2.25    |
| <i>LAMB2P1</i>    | 0.030280891 | -3.83   |
| <i>LAMC1</i>      | 0.005908199 | 2.78    |
| <i>LAMP5</i>      | 0.00341996  | -2.49   |
| <i>LAPTM4A</i>    | 0.09722142  | 1.78    |
| <i>LBH</i>        | 0.020626678 | -2.26   |
| <i>LCOR</i>       | 0.032620878 | -2.53   |
| <i>LCORL</i>      | 0.098782608 | -1.96   |
| <i>LDB3</i>       | 9.42E-13    | 78.47   |
| <i>LDLRAD2</i>    | 0.089640893 | 1.62    |
| <i>LDLRAP1</i>    | 0.017494596 | 2.50    |
| <i>LEPRE1</i>     | 0.000269918 | 2.82    |
| <i>LEPREL1</i>    | 0.00133784  | 2.86    |
| <i>LEPREL2</i>    | 0.002582594 | 2.21    |
| <i>LGR5</i>       | 0.050706819 | 3.03    |
| <i>LHFPL2</i>     | 2.26E-06    | 3.46    |
| <i>LHX1</i>       | 7.15E-06    | -11.48  |
| <i>LHX8</i>       | 0.003086467 | 8.40    |
| <i>LIFR</i>       | 0.043447986 | -1.82   |
| <i>LINC00930</i>  | 0.03797565  | 9.57    |
| <i>LINC00950</i>  | 0.00298029  | -2.59   |
| <i>LINGO3</i>     | 7.14E-07    | -39.85  |
| <i>LMNA</i>       | 1.76E-08    | 4.72    |



|                  |             |        |
|------------------|-------------|--------|
| <i>LMO7</i>      | 0.075335846 | 2.02   |
| <i>LMTK2</i>     | 0.053889457 | -1.95  |
| <i>LOC339240</i> | 0.014335506 | 24.90  |
| <i>LOC441204</i> | 0.025459532 | -3.10  |
| <i>LONRF2</i>    | 0.001518591 | -2.69  |
| <i>LPAR2</i>     | 0.007973845 | -2.82  |
| <i>LRFN1</i>     | 0.095825577 | -2.10  |
| <i>LRP2BP</i>    | 0.017120716 | -3.27  |
| <i>LRP8</i>      | 1.85E-05    | -4.32  |
| <i>LRRC14B</i>   | 0.02193309  | 13.39  |
| <i>LRRC16B</i>   | 1.38E-06    | -5.09  |
| <i>LRRC2</i>     | 0.044532245 | 7.50   |
| <i>LRRC20</i>    | 0.061304751 | -2.00  |
| <i>LRRC26</i>    | 0.037726825 | -5.25  |
| <i>LRRC3</i>     | 0.072418678 | -2.23  |
| <i>LRRC39</i>    | 2.20E-05    | 7.83   |
| <i>LRRK1</i>     | 0.009412079 | 3.99   |
| <i>LRRN1</i>     | 0.002209679 | 2.81   |
| <i>LRRN4CL</i>   | 2.97E-06    | 4.47   |
| <i>LRTM1</i>     | 0.028496092 | 15.60  |
| <i>LSP1</i>      | 0.003996178 | 8.63   |
| <i>LZTS3</i>     | 0.002118836 | -2.95  |
| <i>MADCAMI</i>   | 0.089905942 | -4.82  |
| <i>MAFA</i>      | 0.065303478 | 5.18   |
| <i>MAFF</i>      | 0.063292547 | -2.77  |
| <i>MAGEL2</i>    | 0.041666512 | -2.07  |
| <i>MAGI1</i>     | 0.037371683 | -2.18  |
| <i>MAGI3</i>     | 0.023984628 | -2.46  |
| <i>MALL</i>      | 0.000426876 | -19.86 |
| <i>MAMSTR</i>    | 0.011499862 | 4.21   |
| <i>MAN2B1</i>    | 0.094717194 | 1.66   |
| <i>MAP1B</i>     | 0.021528919 | -3.25  |
| <i>MAP2</i>      | 0.013422993 | -2.79  |
| <i>MAP3K10</i>   | 0.028072421 | -2.37  |
| <i>MAP6</i>      | 0.001552102 | -3.20  |
| <i>MAP7</i>      | 0.061823197 | -2.43  |

|                 |             |         |
|-----------------|-------------|---------|
| <i>MAPK11</i>   | 0.010374344 | -2.68   |
| <i>MAPK8IP2</i> | 0.001039876 | -2.93   |
| <i>MAPT</i>     | 9.08E-05    | -3.83   |
| <i>MARK1</i>    | 1.57E-05    | -3.62   |
| <i>MAST1</i>    | 2.74E-07    | -4.07   |
| <i>MAT1A</i>    | 0.015209499 | -6.84   |
| <i>MATN2</i>    | 0.01508391  | 1.83    |
| <i>MCF2L2</i>   | 0.02042631  | -3.15   |
| <i>MCOLN3</i>   | 0.013629831 | 6.42    |
| <i>MEIS1</i>    | 0.01618628  | -2.34   |
| <i>MET</i>      | 0.030451161 | 3.57    |
| <i>MFAP5</i>    | 1.77E-06    | 26.27   |
| <i>MFSD4</i>    | 0.006969613 | -3.77   |
| <i>MGAT5</i>    | 0.018457351 | -1.90   |
| <i>MGAT5B</i>   | 0.007436033 | -2.49   |
| <i>MGP</i>      | 5.65E-07    | 3.88    |
| <i>MIAT</i>     | 0.000870525 | -3.48   |
| <i>MICAL3</i>   | 0.074109222 | -2.23   |
| <i>MINA</i>     | 0.000165778 | 3.08    |
| <i>MKRN3</i>    | 0.000109246 | -6.77   |
| <i>MLLT11</i>   | 0.048162535 | -2.31   |
| <i>MLLT4</i>    | 0.002712592 | -2.48   |
| <i>MLXIPL</i>   | 0.000301417 | -5.24   |
| <i>MMP15</i>    | 7.10E-05    | -3.17   |
| <i>MMP2</i>     | 6.63E-05    | 4.32    |
| <i>MOCOS</i>    | 0.00384265  | 4.03    |
| <i>MORN4</i>    | 0.0195545   | -2.42   |
| <i>MPP2</i>     | 0.016988094 | -2.23   |
| <i>MPPED2</i>   | 0.065020092 | -2.06   |
| <i>MRAP2</i>    | 0.021058041 | 2.39    |
| <i>MS4A6A</i>   | 0.033798325 | -101.33 |
| <i>MSC</i>      | 2.92E-12    | 9.92    |
| <i>MSR1</i>     | 0.075211712 | 26.16   |
| <i>MSRB3</i>    | 5.51E-06    | 4.09    |
| <i>MSTN</i>     | 0.014335506 | 2.53    |
| <i>MSXI</i>     | 8.40E-07    | 3.90    |

|               |             |         |
|---------------|-------------|---------|
| <i>MT1A</i>   | 0.0901614   | -17.52  |
| <i>MT1E</i>   | 0.022171624 | -3.80   |
| <i>MT1F</i>   | 0.024881085 | -3.55   |
| <i>MT1X</i>   | 0.017540088 | -3.37   |
| <i>MT2A</i>   | 0.001077321 | -4.35   |
| <i>MTG1</i>   | 0.056720061 | 2.17    |
| <i>MTHFD2</i> | 0.078706241 | 1.84    |
| <i>MTMR4</i>  | 0.066889075 | -1.95   |
| <i>MTMR9</i>  | 0.086620607 | -1.88   |
| <i>MTTP</i>   | 0.003455435 | -3.65   |
| <i>MUSK</i>   | 1.32E-12    | 29.68   |
| <i>MUSTN1</i> | 0.000947588 | 9.08    |
| <i>MVP</i>    | 0.044133948 | 1.75    |
| <i>MXD1</i>   | 0.008451978 | -2.91   |
| <i>MYADM</i>  | 0.057277493 | 1.81    |
| <i>MYCBP</i>  | 0.00614038  | 3.13    |
| <i>MYCN</i>   | 1.53E-05    | -4.42   |
| <i>MYF5</i>   | 0.00837844  | 15.20   |
| <i>MYF6</i>   | 1.02E-12    | 68.89   |
| <i>MYH2</i>   | 0.000438654 | 62.00   |
| <i>MYH3</i>   | 2.21E-07    | 56.46   |
| <i>MYL12A</i> | 0.000138091 | 2.85    |
| <i>MYL7</i>   | 0.000381025 | -101.33 |
| <i>MYLIP</i>  | 0.003492136 | 2.46    |
| <i>MYLK2</i>  | 0.0002094   | 11.85   |
| <i>MYO1C</i>  | 0.001190231 | 2.53    |
| <i>MYO5A</i>  | 4.28E-05    | -3.27   |
| <i>MYOF</i>   | 0.007149397 | 2.03    |
| <i>NCKAP5</i> | 0.094717194 | -2.39   |
| <i>NCOA7</i>  | 0.035798857 | 2.11    |
| <i>NEBL</i>   | 0.060194627 | -1.99   |
| <i>NECAB3</i> | 0.005042355 | 2.30    |
| <i>NECAP1</i> | 0.025233688 | -2.22   |
| <i>NEFL</i>   | 0.000191632 | -3.64   |
| <i>NEK9</i>   | 0.00088215  | 2.68    |
| <i>NELL2</i>  | 1.10E-05    | -3.70   |

|                |             |         |
|----------------|-------------|---------|
| <i>NETO2</i>   | 0.015594906 | -2.39   |
| <i>NEU4</i>    | 0.02631817  | 7.58    |
| <i>NIDI</i>    | 0.000121019 | 3.14    |
| <i>NIMI</i>    | 0.081363835 | -2.68   |
| <i>NIPAL4</i>  | 0.040721212 | -5.73   |
| <i>NKAIN1</i>  | 3.23E-10    | -4.75   |
| <i>NKAIN2</i>  | 0.002611304 | -5.72   |
| <i>NLK</i>     | 0.010561467 | -2.30   |
| <i>NMRK2</i>   | 8.86E-06    | 13.06   |
| <i>NMU</i>     | 0.057647642 | -4.92   |
| <i>NNMT</i>    | 1.08E-07    | 3.81    |
| <i>NOG</i>     | 0.062053072 | 2.58    |
| <i>NOSIAP</i>  | 0.095628367 | -2.62   |
| <i>NOS3</i>    | 0.000165778 | -16.59  |
| <i>NOTUM</i>   | 0.088233235 | 2.99    |
| <i>NOVA2</i>   | 0.000345588 | -3.54   |
| <i>NPCI</i>    | 0.020803948 | 2.08    |
| <i>NPTX1</i>   | 0.008758467 | -2.53   |
| <i>NPTX2</i>   | 0.033985927 | 2.06    |
| <i>NPTXR</i>   | 0.000917291 | -3.38   |
| <i>NPVF</i>    | 0.005953704 | -13.87  |
| <i>NPY6R</i>   | 0.050576525 | 11.65   |
| <i>NQO1</i>    | 5.30E-06    | 3.40    |
| <i>NR1H4</i>   | 0.003418922 | -19.62  |
| <i>NREP</i>    | 0.000340004 | -3.61   |
| <i>NUAK1</i>   | 0.055765321 | -2.07   |
| <i>NXPH3</i>   | 0.000746929 | -4.10   |
| <i>NYAPI</i>   | 2.37E-06    | -4.20   |
| <i>OAF</i>     | 0.099202684 | 1.56    |
| <i>OBSCN</i>   | 0.095240604 | 1.72    |
| <i>OLFML1</i>  | 3.29E-18    | 12.41   |
| <i>OLFML3</i>  | 3.60E-11    | 5.02    |
| <i>ONECUT1</i> | 0.031352986 | -7.95   |
| <i>ONECUT2</i> | 0.000278998 | -3.53   |
| <i>ORM1</i>    | 0.011191014 | -101.33 |
| <i>OSR2</i>    | 0.000560298 | 6.12    |

|                 |             |        |
|-----------------|-------------|--------|
| <i>OSTC</i>     | 0.000511814 | 2.59   |
| <i>OXTR</i>     | 0.090450209 | 2.69   |
| <i>P2RX3</i>    | 0.00144673  | -6.41  |
| <i>P4HA2</i>    | 4.98E-07    | 3.68   |
| <i>PABPC4</i>   | 0.024731847 | 2.08   |
| <i>PAC SIN3</i> | 0.002431428 | 2.46   |
| <i>PAFAH1B3</i> | 0.041410544 | -2.29  |
| <i>PAH</i>      | 0.000924654 | -17.91 |
| <i>PAIP2B</i>   | 0.000741514 | -3.08  |
| <i>PALM2</i>    | 0.024805783 | 1.98   |
| <i>PALMD</i>    | 5.95E-07    | 4.71   |
| <i>PAQR5</i>    | 9.86E-05    | -7.24  |
| <i>PARD6B</i>   | 0.091040116 | -2.24  |
| <i>PARP9</i>    | 0.011499862 | 2.10   |
| <i>PASK</i>     | 0.049210128 | -2.42  |
| <i>PAX5</i>     | 0.000108431 | -7.20  |
| <i>PAX7</i>     | 0.052163677 | 5.89   |
| <i>PAX9</i>     | 0.003367512 | 15.00  |
| <i>PBX3</i>     | 0.000169247 | -3.21  |
| <i>PCCA</i>     | 0.059194577 | 1.98   |
| <i>PCDH18</i>   | 0.036902005 | 2.01   |
| <i>PCDHB1</i>   | 9.61E-05    | 416.25 |
| <i>PCSK1</i>    | 0.00712324  | 2.31   |
| <i>PCSK6</i>    | 0.058730866 | -3.49  |
| <i>PDGFB</i>    | 6.77E-06    | -6.58  |
| <i>PDGFD</i>    | 2.90E-05    | 3.29   |
| <i>PDIA2</i>    | 7.79E-08    | -8.94  |
| <i>PDIK1L</i>   | 0.013006217 | -2.47  |
| <i>PDLIM3</i>   | 0.004061226 | 2.64   |
| <i>PDYN</i>     | 2.22E-15    | -31.60 |
| <i>PDZD7</i>    | 0.001397186 | -5.22  |
| <i>PEAR1</i>    | 0.089507124 | 2.71   |
| <i>PEX5L</i>    | 0.036687615 | -4.00  |
| <i>PFKFB4</i>   | 0.000292927 | -3.73  |
| <i>PFKM</i>     | 0.064211665 | 2.05   |
| <i>PGA5</i>     | 0.000479653 | 74.08  |

|                 |             |        |
|-----------------|-------------|--------|
| <i>PGAP1</i>    | 0.061111711 | -1.92  |
| <i>PGF</i>      | 0.001141494 | 2.90   |
| <i>PGM2L1</i>   | 5.77E-05    | -2.99  |
| <i>PGM5</i>     | 4.17E-08    | 5.10   |
| <i>PHLPP1</i>   | 0.050388561 | -1.86  |
| <i>PHYHD1</i>   | 0.02437582  | 6.99   |
| <i>PIK3C2B</i>  | 0.089640893 | -1.90  |
| <i>PITHD1</i>   | 0.067580204 | -2.15  |
| <i>PITPNC1</i>  | 0.014946468 | -2.56  |
| <i>PITPNM3</i>  | 0.032710227 | -2.24  |
| <i>PITX2</i>    | 9.47E-15    | 11.18  |
| <i>PKLR</i>     | 0.041666512 | -3.60  |
| <i>PLAC9</i>    | 0.01567956  | 4.95   |
| <i>PLAGL1</i>   | 0.001220812 | 2.59   |
| <i>PLAT</i>     | 0.054476839 | -2.41  |
| <i>PLAU</i>     | 0.013963673 | 2.52   |
| <i>PLCD4</i>    | 0.001042472 | 3.40   |
| <i>PLCH2</i>    | 3.98E-06    | -4.87  |
| <i>PLEK2</i>    | 0.022434455 | -13.23 |
| <i>PLEKHG3</i>  | 0.094679406 | 1.93   |
| <i>PLEKHG4B</i> | 0.043495663 | 1.80   |
| <i>PLIN2</i>    | 0.033941931 | -2.79  |
| <i>PLSCR3</i>   | 0.0620129   | 1.78   |
| <i>PLSCR4</i>   | 0.010479103 | 1.92   |
| <i>PNMAL2</i>   | 0.081832922 | -2.44  |
| <i>PNPLA3</i>   | 0.060049557 | -2.58  |
| <i>PODXL2</i>   | 3.96E-07    | -4.56  |
| <i>POPDC3</i>   | 0.002378153 | 6.50   |
| <i>POU2F2</i>   | 6.35E-08    | -7.35  |
| <i>POU3F1</i>   | 0.007034544 | -4.99  |
| <i>POU4F2</i>   | 4.30E-09    | -19.11 |
| <i>POU6F1</i>   | 0.015578232 | -2.58  |
| <i>PPM1E</i>    | 0.000795295 | -2.56  |
| <i>PPM1F</i>    | 0.050388561 | 1.77   |
| <i>PPMIJ</i>    | 0.076374666 | -2.66  |
| <i>PPPICA</i>   | 0.098342246 | 1.64   |

|                          |             |        |
|--------------------------|-------------|--------|
| <i>PPP1R13L</i>          | 0.099424201 | -2.41  |
| <i>PPP1R27</i>           | 2.02E-10    | -5.95  |
| <i>PPP1R3A</i>           | 2.07E-05    | 46.22  |
| <i>PRELP</i>             | 0.065461477 | 1.78   |
| <i>PREX2</i>             | 0.074660479 | -2.95  |
| <i>PRG2</i>              | 0.002497204 | -2.69  |
| <i>PRKAG3</i>            | 0.071400234 | 14.44  |
| <i>PRKCG</i>             | 0.000744906 | -3.56  |
| <i>PRKG1</i>             | 0.071687643 | 2.32   |
| <i>PRLR</i>              | 0.01241092  | 3.27   |
| <i>PRND</i>              | 0.002665696 | 5.05   |
| <i>PROCR</i>             | 0.094050202 | 1.82   |
| <i>PRPH</i>              | 0.000104146 | -3.64  |
| <i>PRR5-<br/>ARHGAP8</i> | 0.020695279 | -4.04  |
| <i>PRRX2</i>             | 0.000764393 | 3.78   |
| <i>PRTFDC1</i>           | 0.001549276 | -4.34  |
| <i>PTCHD2</i>            | 0.003232682 | -2.80  |
| <i>PTGER4</i>            | 7.80E-11    | 14.10  |
| <i>PTGFR</i>             | 4.89E-07    | 3.93   |
| <i>PTGS2</i>             | 0.095854241 | 3.16   |
| <i>PTH2</i>              | 0.051439416 | -6.80  |
| <i>PTK7</i>              | 0.036360676 | 2.01   |
| <i>PTPRF</i>             | 0.065861491 | -2.12  |
| <i>PTPRH</i>             | 0.001115694 | -4.71  |
| <i>PTPRJ</i>             | 0.06814957  | -2.82  |
| <i>PTPRN2</i>            | 6.68E-11    | -4.78  |
| <i>PTPRS</i>             | 0.036007515 | -2.44  |
| <i>PTRF</i>              | 0.000641541 | 2.65   |
| <i>PXDN</i>              | 0.01538077  | 2.24   |
| <i>PXK</i>               | 0.033955942 | 1.93   |
| <i>PXN</i>               | 0.043664977 | 1.79   |
| <i>PYCR1</i>             | 0.008523733 | 2.15   |
| <i>PYDC1</i>             | 0.016326649 | -23.13 |
| <i>PYGM</i>              | 8.83E-06    | 7.61   |
| <i>QPCT</i>              | 0.046514039 | -3.08  |

|                |             |        |
|----------------|-------------|--------|
| <i>QPRT</i>    | 0.080689227 | 1.68   |
| <i>RAB26</i>   | 0.001651175 | -5.46  |
| <i>RAB39A</i>  | 0.061823197 | -2.78  |
| <i>RAB3IP</i>  | 0.027703153 | -2.37  |
| <i>RALGPS1</i> | 8.62E-06    | -3.42  |
| <i>RALGPS2</i> | 0.07769864  | 1.86   |
| <i>RALYL</i>   | 0.003098002 | -3.62  |
| <i>RARA</i>    | 0.054476839 | 1.78   |
| <i>RARG</i>    | 0.020432704 | 1.96   |
| <i>RASAL1</i>  | 0.01612115  | -3.70  |
| <i>RASD1</i>   | 0.033565405 | -3.34  |
| <i>RASSF3</i>  | 0.001255318 | 3.93   |
| <i>RASSF7</i>  | 5.95E-05    | -4.73  |
| <i>RBCK1</i>   | 0.015483389 | 1.93   |
| <i>RBM24</i>   | 0.027189536 | 5.96   |
| <i>RBM47</i>   | 0.06001616  | -3.13  |
| <i>RBPI</i>    | 0.024583218 | -2.24  |
| <i>RFK</i>     | 0.061467436 | -1.99  |
| <i>RFPL1</i>   | 0.020164056 | -3.54  |
| <i>RFPLIS</i>  | 5.77E-05    | -3.86  |
| <i>RFPL2</i>   | 0.082801034 | -5.05  |
| <i>RFX3</i>    | 0.00938772  | -2.43  |
| <i>RIC3</i>    | 0.000635936 | -2.86  |
| <i>RIMKLA</i>  | 0.040393581 | -2.09  |
| <i>RIMS2</i>   | 0.009197331 | -3.65  |
| <i>RIN3</i>    | 0.009895319 | 2.80   |
| <i>RIPPLY2</i> | 0.071687643 | -11.47 |
| <i>RNASE1</i>  | 0.027823053 | -44.00 |
| <i>RNF125</i>  | 0.021539339 | 6.93   |
| <i>RNF141</i>  | 0.020756078 | -2.13  |
| <i>RNF144B</i> | 0.092942757 | 3.95   |
| <i>RNF165</i>  | 4.19E-06    | -4.02  |
| <i>RNF186</i>  | 0.03241566  | -13.93 |
| <i>RNFT2</i>   | 0.016431944 | -2.70  |
| <i>ROR2</i>    | 0.000191895 | 2.76   |
| <i>RPE65</i>   | 0.021197039 | -3.38  |

|                |             |         |
|----------------|-------------|---------|
| <i>RPL10A</i>  | 0.082801034 | 1.70    |
| <i>RPL12</i>   | 0.017902873 | 1.93    |
| <i>RPL13A</i>  | 0.050817522 | 1.97    |
| <i>RPL22L1</i> | 0.027033644 | 2.33    |
| <i>RPL28</i>   | 0.085610119 | 1.74    |
| <i>RPL31</i>   | 0.083790496 | 1.65    |
| <i>RPL35</i>   | 0.063617698 | 1.68    |
| <i>RPLP0</i>   | 0.065478655 | 2.07    |
| <i>RPP25</i>   | 0.035007032 | -2.53   |
| <i>RPS12</i>   | 0.026467147 | 2.00    |
| <i>RPS9</i>    | 0.092489062 | 1.56    |
| <i>RPSA</i>    | 0.068154067 | 1.72    |
| <i>RRBP1</i>   | 0.018592846 | 1.95    |
| <i>RREB1</i>   | 0.02056285  | 2.14    |
| <i>RSBN1</i>   | 0.074279337 | -1.93   |
| <i>RSPO1</i>   | 0.010565403 | 3.20    |
| <i>RTN2</i>    | 0.020465933 | 2.16    |
| <i>RTN3</i>    | 0.021616902 | -2.21   |
| <i>RUFY3</i>   | 0.09248978  | -1.98   |
| <i>RUNDC3A</i> | 5.77E-06    | -3.94   |
| <i>RUNX1</i>   | 0.03797565  | 4.79    |
| <i>RUSC2</i>   | 0.045960996 | -2.18   |
| <i>SI00A11</i> | 0.000445317 | 2.47    |
| <i>SI00A8</i>  | 0.001552683 | -52.53  |
| <i>SIPR2</i>   | 0.007463967 | 2.92    |
| <i>SIPR3</i>   | 0.050802665 | 1.77    |
| <i>SAMD10</i>  | 0.020397988 | -2.94   |
| <i>SAMD11</i>  | 0.040475648 | 1.78    |
| <i>SAMD14</i>  | 0.07237579  | -2.21   |
| <i>SAMD9L</i>  | 0.034392901 | 2.01    |
| <i>SBK1</i>    | 3.47E-07    | -4.33   |
| <i>SCD5</i>    | 0.082112956 | -1.98   |
| <i>SCG3</i>    | 1.55E-06    | -3.74   |
| <i>SCGB3A1</i> | 0.030025075 | -101.33 |
| <i>SCN4A</i>   | 0.070692609 | 3.78    |
| <i>SCN8A</i>   | 0.033922836 | -2.42   |

|                 |             |        |
|-----------------|-------------|--------|
| <i>SCNN1A</i>   | 0.036687615 | -10.82 |
| <i>SCOC</i>     | 0.082801034 | -1.95  |
| <i>SCRT1</i>    | 3.28E-10    | -7.29  |
| <i>SCRT2</i>    | 3.41E-17    | -12.51 |
| <i>SDC2</i>     | 0.040182054 | 1.96   |
| <i>SDCBP2</i>   | 0.095628367 | -3.67  |
| <i>SEC11A</i>   | 0.011977226 | 2.04   |
| <i>SEC11C</i>   | 0.023389631 | -2.42  |
| <i>SEC14L5</i>  | 0.016752353 | -5.17  |
| <i>SEC24D</i>   | 0.011658994 | 2.14   |
| <i>SEMA3G</i>   | 0.000105626 | 8.08   |
| <i>SEMA4G</i>   | 0.024524598 | -2.28  |
| <i>SEMA7A</i>   | 0.001941577 | -3.40  |
| <i>SERPINB9</i> | 0.020164056 | -4.54  |
| <i>SERPINF1</i> | 1.09E-06    | 4.16   |
| <i>SESTD1</i>   | 0.005922035 | -2.48  |
| <i>SETD7</i>    | 0.000191895 | 3.19   |
| <i>SFN</i>      | 0.010859782 | -17.49 |
| <i>SFXN1</i>    | 0.099730956 | -1.88  |
| <i>SGMS2</i>    | 0.078952851 | 2.70   |
| <i>SH2D3C</i>   | 1.98E-07    | -5.20  |
| <i>SH2D5</i>    | 0.026774219 | -2.83  |
| <i>SH2D7</i>    | 0.03124747  | -4.00  |
| <i>SH3D19</i>   | 0.00503862  | 2.44   |
| <i>SH3RF2</i>   | 0.027941486 | 5.94   |
| <i>SHQ1</i>     | 0.076107778 | 1.93   |
| <i>SIMI</i>     | 0.082211316 | 3.83   |
| <i>SIPA1L3</i>  | 0.084287019 | -2.01  |
| <i>SIRPA</i>    | 0.046556136 | 1.70   |
| <i>SIX1</i>     | 1.16E-12    | 7.07   |
| <i>SIX2</i>     | 7.55E-19    | 8.90   |
| <i>SIX4</i>     | 0.001893998 | 3.29   |
| <i>SKOR1</i>    | 0.002550213 | -5.33  |
| <i>SLAIN1</i>   | 0.003492136 | -2.64  |
| <i>SLC12A8</i>  | 0.001362411 | -4.93  |
| <i>SLC16A14</i> | 0.00991957  | -3.03  |

|                 |             |        |
|-----------------|-------------|--------|
| <i>SLC16A9</i>  | 0.001067267 | 2.81   |
| <i>SLC18A3</i>  | 1.13E-05    | -6.00  |
| <i>SLC1A6</i>   | 0.008064911 | -3.68  |
| <i>SLC22A23</i> | 0.026642657 | -2.13  |
| <i>SLC25A22</i> | 0.082649104 | -2.10  |
| <i>SLC25A24</i> | 5.01E-05    | 3.58   |
| <i>SLC25A27</i> | 0.051973595 | -2.70  |
| <i>SLC26A10</i> | 0.055207882 | -2.59  |
| <i>SLC26A2</i>  | 0.038621339 | 1.82   |
| <i>SLC29A1</i>  | 0.000272462 | 2.86   |
| <i>SLC2A4RG</i> | 0.048152774 | 1.81   |
| <i>SLC32A1</i>  | 6.52E-05    | -2.65  |
| <i>SLC35F1</i>  | 7.50E-05    | -3.10  |
| <i>SLC40A1</i>  | 0.08680324  | 1.76   |
| <i>SLC43A2</i>  | 0.01076115  | -2.83  |
| <i>SLC44A1</i>  | 0.062582189 | 1.87   |
| <i>SLC45A4</i>  | 0.017041785 | 2.45   |
| <i>SLC4A8</i>   | 0.001773233 | -3.03  |
| <i>SLC6A1</i>   | 0.092305481 | -1.76  |
| <i>SLC6A13</i>  | 0.009781286 | 14.63  |
| <i>SLC6A3</i>   | 0.010226599 | 5.83   |
| <i>SLC6A7</i>   | 7.59E-05    | -30.00 |
| <i>SLC7A7</i>   | 0.00189433  | 4.13   |
| <i>SLC8A2</i>   | 0.001497451 | -2.63  |
| <i>SLC9A9</i>   | 0.040262621 | 1.89   |
| <i>SLFN11</i>   | 0.017494596 | 2.41   |
| <i>SLFN5</i>    | 0.058168121 | 2.29   |
| <i>SMARCD2</i>  | 0.075159057 | 1.74   |
| <i>SMC6</i>     | 0.088996687 | 1.80   |
| <i>SMOC2</i>    | 5.06E-06    | 3.45   |
| <i>SMPD3</i>    | 3.63E-11    | -5.61  |
| <i>SMTNL2</i>   | 0.006887367 | 3.91   |
| <i>SNAI1</i>    | 0.000269519 | 4.42   |
| <i>SNAI2</i>    | 6.39E-06    | 3.50   |
| <i>SNHG5</i>    | 7.36E-06    | 3.65   |
| <i>SNHG8</i>    | 0.021798893 | 2.08   |

|                    |             |         |
|--------------------|-------------|---------|
| <i>SNORD116-12</i> | 0.098454251 | 416.25  |
| <i>SNX10</i>       | 0.000100096 | -3.57   |
| <i>SOCS7</i>       | 0.075594096 | -2.43   |
| <i>SOGA3</i>       | 5.17E-07    | -3.98   |
| <i>SORBS2</i>      | 0.007973845 | -2.33   |
| <i>SORL1</i>       | 0.00084042  | -2.97   |
| <i>SOX1</i>        | 0.008244458 | -2.20   |
| <i>SOX11</i>       | 0.000715888 | -3.16   |
| <i>SOX2-OT</i>     | 0.000680764 | -3.00   |
| <i>SOX4</i>        | 0.001680751 | -3.57   |
| <i>SPAG4</i>       | 0.065867426 | -3.96   |
| <i>SPATA13</i>     | 0.000625419 | -2.95   |
| <i>SPG21</i>       | 0.060448256 | 1.73    |
| <i>SPIDR</i>       | 0.07614192  | 1.67    |
| <i>SPIRE2</i>      | 0.027631254 | -2.82   |
| <i>SPNS2</i>       | 0.048462151 | -2.52   |
| <i>SPON1</i>       | 0.02071709  | 2.51    |
| <i>SPP1</i>        | 0.011828489 | -2.87   |
| <i>SPRR3</i>       | 0.007606414 | -101.33 |
| <i>SPTBN2</i>      | 0.00179205  | -2.61   |
| <i>SRCIN1</i>      | 4.34E-05    | -3.20   |
| <i>SRGAP3</i>      | 0.010575763 | -2.12   |
| <i>SRRM3</i>       | 0.051215703 | -2.14   |
| <i>SRRM4</i>       | 0.036036065 | -2.12   |
| <i>SSFA2</i>       | 0.096499705 | -1.98   |
| <i>SSPN</i>        | 0.001773233 | 2.43    |
| <i>ST3GAL6</i>     | 0.061428385 | -3.76   |
| <i>ST8SIA1</i>     | 0.002121041 | -2.69   |
| <i>ST8SIA2</i>     | 2.97E-06    | -3.73   |
| <i>STAG3</i>       | 0.048544065 | -2.52   |
| <i>STARD13</i>     | 0.087729326 | 1.82    |
| <i>STAT6</i>       | 0.01306124  | 2.09    |
| <i>STEAP3</i>      | 0.050998297 | 1.59    |
| <i>STK38</i>       | 0.044803646 | 1.86    |
| <i>STK38L</i>      | 0.055408467 | 1.91    |

|                 |             |         |
|-----------------|-------------|---------|
| <i>STMN3</i>    | 0.047122136 | -2.18   |
| <i>STOX2</i>    | 0.001339306 | -2.88   |
| <i>STRBP</i>    | 0.080288916 | -1.93   |
| <i>STX12</i>    | 0.053192545 | -2.14   |
| <i>SULF2</i>    | 0.011111988 | 3.17    |
| <i>SVIP</i>     | 0.053291335 | -2.66   |
| <i>SVOP</i>     | 2.25E-10    | -7.60   |
| <i>SYN2</i>     | 0.056730949 | 2.30    |
| <i>SYNDIGIL</i> | 5.94E-05    | -8.27   |
| <i>SYNJI</i>    | 0.04374308  | -1.98   |
| <i>SYNJ2</i>    | 0.026675778 | 2.21    |
| <i>SYTI1</i>    | 0.007438721 | -2.68   |
| <i>SYTI3</i>    | 1.78E-13    | -5.52   |
| <i>SYTI6</i>    | 0.030677372 | -3.51   |
| <i>TAC3</i>     | 3.20E-11    | -15.12  |
| <i>TAGLN3</i>   | 0.048110458 | -2.28   |
| <i>TARBP1</i>   | 0.04981449  | -2.28   |
| <i>TBC1D2B</i>  | 0.02687182  | 2.16    |
| <i>TBX1</i>     | 0.000463481 | 8.19    |
| <i>TBX15</i>    | 2.83E-14    | 7.78    |
| <i>TBX3</i>     | 0.029247104 | 2.74    |
| <i>TCEA3</i>    | 0.002309656 | 5.23    |
| <i>TCF15</i>    | 0.00576802  | -8.15   |
| <i>TCTA</i>     | 0.089937933 | 1.85    |
| <i>TCTE1</i>    | 0.083130546 | -3.63   |
| <i>TEAD4</i>    | 1.10E-06    | 9.26    |
| <i>TEF</i>      | 0.007492346 | 2.31    |
| <i>TENC1</i>    | 0.035888481 | 1.84    |
| <i>TET1</i>     | 0.011799165 | -1.97   |
| <i>TFF2</i>     | 0.012846946 | -101.33 |
| <i>TFR2</i>     | 0.000135498 | -8.28   |
| <i>TGFBR2</i>   | 7.84E-06    | 3.52    |
| <i>TGFBR3</i>   | 3.59E-09    | 4.63    |
| <i>THBD</i>     | 0.001836309 | 4.33    |
| <i>THBS3</i>    | 0.01586154  | 2.05    |
| <i>THY1</i>     | 0.026467147 | 1.97    |

|                  |             |       |
|------------------|-------------|-------|
| <i>TIGD3</i>     | 0.048219253 | -4.03 |
| <i>TJP3</i>      | 0.010547743 | -3.71 |
| <i>TLE4</i>      | 0.08338071  | -1.94 |
| <i>TLNI</i>      | 0.084935884 | 1.72  |
| <i>TMC4</i>      | 0.041365909 | -6.02 |
| <i>TMEFF1</i>    | 5.70E-05    | -3.22 |
| <i>TMEM109</i>   | 7.22E-05    | 3.08  |
| <i>TMEM119</i>   | 1.86E-09    | 5.51  |
| <i>TMEM130</i>   | 0.0195434   | -2.60 |
| <i>TMEM145</i>   | 4.13E-05    | -4.50 |
| <i>TMEM178A</i>  | 0.002115216 | -2.92 |
| <i>TMEM182</i>   | 0.033010125 | 2.21  |
| <i>TMEM189</i>   | 0.014044073 | 2.04  |
| <i>TMEM196</i>   | 0.000263506 | -3.75 |
| <i>TMEM214</i>   | 0.033280648 | 1.87  |
| <i>TMEM26</i>    | 0.022871713 | 2.66  |
| <i>TMEM260</i>   | 0.076397906 | 1.80  |
| <i>TMEM38B</i>   | 0.000188967 | 3.45  |
| <i>TMEM56</i>    | 0.000635936 | 2.79  |
| <i>TMEM64</i>    | 0.006025875 | 2.35  |
| <i>TMEM74</i>    | 0.016950125 | -3.84 |
| <i>TMEM74B</i>   | 0.000142451 | -3.68 |
| <i>TNFRSF11B</i> | 0.010629284 | 3.14  |
| <i>TNFRSF1A</i>  | 0.067246363 | 1.59  |
| <i>TNFRSF13B</i> | 0.009525841 | 14.60 |
| <i>TNFRSF4</i>   | 0.033804754 | 3.20  |
| <i>TNNI3</i>     | 0.005922035 | -6.24 |
| <i>TNPO2</i>     | 0.082801034 | -2.11 |
| <i>TOX2</i>      | 1.54E-05    | -3.67 |
| <i>TPMI</i>      | 2.84E-12    | 6.57  |
| <i>TPPP3</i>     | 0.065322419 | 2.13  |
| <i>TRH</i>       | 1.67E-09    | -6.20 |
| <i>TRIB1</i>     | 0.000317038 | -3.72 |
| <i>TRIB2</i>     | 0.002839924 | -2.79 |
| <i>TRIL</i>      | 0.003843542 | 2.33  |
| <i>TRIM24</i>    | 0.018901298 | -2.15 |

|                |             |       |
|----------------|-------------|-------|
| <i>TRIM38</i>  | 0.002806819 | 4.86  |
| <i>TRIM54</i>  | 0.000342575 | 9.60  |
| <i>TRIM62</i>  | 0.008627726 | 2.36  |
| <i>TRIM63</i>  | 6.64E-11    | 14.60 |
| <i>TRIM71</i>  | 0.012036057 | -5.90 |
| <i>TRPC6</i>   | 6.65E-10    | 27.35 |
| <i>TRPV4</i>   | 0.009176826 | 5.83  |
| <i>TSHZ3</i>   | 0.038498303 | 1.96  |
| <i>TSKU</i>    | 0.013985553 | 2.01  |
| <i>TSPAN13</i> | 0.002058546 | -2.65 |
| <i>TSPAN2</i>  | 0.087076367 | -2.31 |
| <i>TTBK1</i>   | 4.72E-09    | -5.36 |
| <i>TTC9B</i>   | 4.57E-08    | -6.14 |
| <i>TTYH2</i>   | 0.067212371 | 1.69  |
| <i>TUB</i>     | 0.040168991 | -2.20 |
| <i>TUBB2A</i>  | 0.003025684 | -2.72 |
| <i>TUBB2B</i>  | 2.61E-05    | -3.90 |
| <i>TUBB3</i>   | 9.10E-05    | -3.91 |
| <i>TUBB4A</i>  | 3.59E-08    | -4.16 |
| <i>TWIST1</i>  | 0.00837844  | 2.98  |
| <i>TXNDC5</i>  | 0.00795843  | 2.30  |
| <i>UBE2E3</i>  | 0.098592244 | 1.66  |
| <i>UBL3</i>    | 0.017522233 | -2.30 |
| <i>UGT3A1</i>  | 0.063314511 | 7.14  |
| <i>UGT3A2</i>  | 0.058175675 | 5.51  |
| <i>ULBP2</i>   | 0.046661428 | -4.25 |
| <i>UNC79</i>   | 0.000159797 | -3.59 |
| <i>USHIG</i>   | 0.018745352 | -4.22 |
| <i>USO1</i>    | 0.056348437 | 1.84  |
| <i>USP49</i>   | 0.077845086 | -2.49 |
| <i>UTS2B</i>   | 0.006377201 | 13.01 |
| <i>UXSI</i>    | 0.065050619 | 1.65  |
| <i>VANGL2</i>  | 0.037726825 | -2.11 |
| <i>VCAN</i>    | 0.010258307 | 3.00  |
| <i>VDR</i>     | 0.003832813 | 4.36  |
| <i>VEGFA</i>   | 0.000205201 | -3.69 |

|                |             |        |
|----------------|-------------|--------|
| <i>VGLL3</i>   | 1.79E-11    | 7.07   |
| <i>VILL</i>    | 0.012011559 | -8.36  |
| <i>VIP</i>     | 0.087121163 | -7.86  |
| <i>VIPR1</i>   | 0.036900937 | -9.47  |
| <i>VSTM4</i>   | 0.031398118 | 3.94   |
| <i>VSX2</i>    | 0.014965805 | -2.64  |
| <i>VTCN1</i>   | 0.00490984  | -7.13  |
| <i>WARS</i>    | 0.058758705 | 1.82   |
| <i>WDR47</i>   | 0.004670586 | -2.45  |
| <i>WDR54</i>   | 0.072125703 | -2.54  |
| <i>WHSC1</i>   | 0.095041048 | -1.88  |
| <i>WIF1</i>    | 0.00041246  | 3.08   |
| <i>WISP2</i>   | 0.05362389  | 6.75   |
| <i>WNT10B</i>  | 0.007677907 | -4.46  |
| <i>WNT11</i>   | 1.84E-05    | 4.73   |
| <i>WNT6</i>    | 0.00968876  | 7.18   |
| <i>WRNIP1</i>  | 0.08947526  | 1.64   |
| <i>WSB1</i>    | 0.040393581 | -2.41  |
| <i>WWC1</i>    | 0.001455538 | -2.67  |
| <i>XIRP1</i>   | 0.000156131 | 21.63  |
| <i>XKR7</i>    | 2.72E-08    | -12.87 |
| <i>YBX2</i>    | 0.071110448 | -2.78  |
| <i>YBX3</i>    | 5.51E-06    | 3.83   |
| <i>YWHAH</i>   | 0.058168121 | -2.15  |
| <i>ZBBX</i>    | 0.089640893 | -4.36  |
| <i>ZBTB16</i>  | 0.01697557  | -3.27  |
| <i>ZC3H6</i>   | 0.051769753 | -2.09  |
| <i>ZDHHC22</i> | 0.018815629 | -2.54  |
| <i>ZDHHC5</i>  | 0.044492011 | 1.79   |
| <i>ZFR2</i>    | 0.011887328 | -3.78  |
| <i>ZMIZ1</i>   | 0.088259931 | -2.08  |
| <i>ZNF106</i>  | 2.11E-05    | 4.54   |
| <i>ZNF25</i>   | 0.053260605 | -2.01  |
| <i>ZNF469</i>  | 0.009305985 | 2.73   |
| <i>ZNF471</i>  | 0.003057712 | 3.90   |
| <i>ZNF502</i>  | 0.031229521 | 4.11   |

|                |             |       |
|----------------|-------------|-------|
| <i>ZNF532</i>  | 0.067128265 | -2.01 |
| <i>ZNF540</i>  | 0.030398891 | -2.85 |
| <i>ZNF697</i>  | 0.087076367 | -1.98 |
| <i>ZNF702P</i> | 0.098543092 | -2.06 |
| <i>ZNF804A</i> | 0.004954068 | -4.52 |
| <i>ZNF835</i>  | 0.077899659 | 9.78  |
| <i>ZPLD1</i>   | 0.076060133 | -4.02 |

**Table S2: RNA-Seq DEGs and highlighted mouse striatal development genes.**

1869 genes, excluding X- and Y-linked genes, were differentially expressed by RNA-Seq analysis, with FDR (False discovery rate) adjusted p-value cutoff set to 10%. Fold-change was calculated and displayed as HD/non-disease. 679 common genes found to be involved in mouse striatal development have been highlighted in red.

| <i>Gene Symbol</i> | <i>Adjusted p-value</i> | <i>Fold Change</i> |
|--------------------|-------------------------|--------------------|
| <i>TGFBR3</i>      | 3.59E-09                | 4.63               |
| <i>HES5</i>        | 8.27E-02                | -3.19              |
| <i>GAD2</i>        | 1.10E-02                | -2.83              |
| <i>ASCL1</i>       | 2.99E-02                | -2.11              |
| <i>TGFB3</i>       | 2.40E-06                | 3.74               |
| <i>DLL3</i>        | 8.44E-04                | -4.03              |
| <i>NEUROD1</i>     | 1.40E-16                | -14.20             |
| <i>GAD1</i>        | 2.68E-09                | -5.53              |
| <i>SLC32A1</i>     | 6.52E-05                | -2.65              |
| <i>ADORA2A</i>     | 4.73E-03                | -3.74              |
| <i>TGFBR2</i>      | 7.84E-06                | 3.52               |
| <i>NEUROG2</i>     | 3.47E-09                | -17.37             |
| <i>POU4F2</i>      | 4.30E-09                | -19.11             |
| <i>HEY2</i>        | 1.41E-02                | 2.78               |
| <i>RREB1</i>       | 2.06E-02                | 2.14               |
| <i>CREB5</i>       | 5.07E-02                | -1.88              |

**Table S3. Genes from Figure 2b**

Fold Change and adjusted p-values for genes from Figure 2b.

| Upstream Regulator | Fold Change | Predicted Activation State | Activation z-score | p-value of overlap |
|--------------------|-------------|----------------------------|--------------------|--------------------|
| REST               |             | Activated                  | 4.038              | 3.63E-14           |
| KDM5B              |             | Activated                  | 3.449              | 1.08E-01           |
| HTT                |             | Activated                  | 3.288              | 4.07E-18           |
| TGFB1              |             | Activated                  | 3.088              | 1.68E-23           |
| IL1B               |             | Activated                  | 2.543              | 2.54E-13           |
| MYOD1              |             | Activated                  | 2.380              | 4.51E-08           |
| TGFBR1             |             | Activated                  | 2.173              | 5.22E-03           |
| IL13               |             | Activated                  | 2.089              | 1.65E-05           |
| BMP2               | 2.717       | Activated                  | 2.014              | 5.49E-07           |
| NCOA2              |             | Activated                  | 2.000              | 3.12E-01           |
| NEUROD1            | -14.200     | Inhibited                  | -1.985             | 3.51E-04           |
| BDNF               |             | Inhibited                  | -2.089             | 6.98E-15           |
| ASCL1              | -2.114      | Inhibited                  | -2.574             | 4.01E-06           |
| ADORA2A            | -3.744      | Inhibited                  | -2.721             | 4.17E-07           |
| NRG (family)       |             | Inhibited                  | -2.828             | 1.42E-04           |
| miR-124-3p         |             | Inhibited                  | -3.638             | 3.05E-06           |

**Table S4. Predicted upstream regulators from RNAseq**

Upstream analysis of RNA-Seq DEGs. Genes with a  $|z\text{-score}| > \text{or} < 2.0$  are assigned a predicted activation state, allowing inferred protein activity based on observed differential gene expression. Analysis of HD DEGs predicts activation or inhibition of several genes known to be involved in HD pathogenesis, as well as possible novel regulators.



**a**

| Class 1 genes GO term                    | FDR      |
|------------------------------------------|----------|
| skeletal system development              | 5.06E-27 |
| neuron differentiation                   | 8.73E-31 |
| transcription factor activity            | 3.24E-25 |
| extracellular region part                | 2.72E-16 |
| regulation of transcription from RNA pol | 9.98E-19 |
| regulation of cell development           | 6.66E-15 |
| signal                                   | 9.45E-16 |
| vasculature development                  | 1.02E-10 |

**b**

| Class 1 genes GO term                    | FDR      |
|------------------------------------------|----------|
| nucleus                                  | 3.46E-56 |
| regulation of transcription from RNA pol | 1.39E-44 |
| sequence-specific DNA binding            | 7.38E-42 |
| pattern specification process            | 1.02E-21 |
| neuron differentiation                   | 2.20E-24 |
| embryonic morphogenesis                  | 4.23E-22 |
| isopeptide bond                          | 1.25E-19 |
| nuclear lumen                            | 1.07E-15 |
| transcription factor binding             | 6.20E-14 |

**c**

| Class 5 genes GO term             | FDR      |
|-----------------------------------|----------|
| synapse                           | 7.09E-08 |
| synaptic transmission             | 2.71E-06 |
| ligand-gated ion channel activity | 6.39E-04 |
| ionic channel                     | 1.82E-07 |
| extracellular matrix              | 2.13E-02 |
| membrane                          | 2.96E-04 |
| glutamate receptor activity       | 7.96E-03 |
| ion binding                       | 9.90E-05 |
| cell projection organization      | 3.74E-02 |
| neurotransmitter transport        | 2.54E-03 |

**d**

| HD-enriched genes GO term            | FDR      | Control-enriched genes GO term | FDR      |
|--------------------------------------|----------|--------------------------------|----------|
| cadherin N-terminal                  | 1.40E-21 | plasma membrane part           | 5.28E-08 |
| muscle system process                | 2.11E-08 | signal                         | 2.53E-09 |
| contractile fiber                    | 1.55E-13 | domain:fibronectin type-III 2  | 1.04E-05 |
| signal                               | 2.07E-09 | plasma membrane                | 3.83E-08 |
| calcium-dependent cell-cell adhesion | 6.68E-05 | Immunoglobulin subtype 2       | 2.37E-03 |
| proteinaceous extracellular matrix   | 3.53E-04 | sequence-specific DNA binding  | 2.68E-02 |
| synaptic transmission                | 4.33E-04 | ion transport                  | 8.86E-04 |
| repeat:PXXP                          | 1.67E-02 |                                |          |
| glycoprotein                         | 4.52E-09 |                                |          |
| muscle organ development             | 4.60E-12 |                                |          |

**e**

| HD-enriched genes GO term                  | FDR      | Control-enriched genes GO term                   | FDR      |
|--------------------------------------------|----------|--------------------------------------------------|----------|
| myofibril                                  | 4.14E-09 | synaptic transmission                            | 1.39E-11 |
| muscle contraction                         | 1.01E-06 | neuron differentiation                           | 4.69E-09 |
| actin cytoskeleton                         | 7.72E-05 | topological domain:Cytoplasmic                   | 4.32E-06 |
| muscle organ development                   | 3.37E-06 | plasma membrane part                             | 1.67E-06 |
| muscle protein                             | 2.39E-02 | glycoprotein                                     | 1.99E-05 |
| cytoskeleton                               | 8.30E-03 | ionic channel                                    | 8.79E-07 |
| dystrophin-associated glycoprotein complex | 7.20E-03 | hsa04080:Neuroactive ligand-receptor interaction | 6.98E-05 |
| striated muscle tissue development         | 1.14E-02 | adult behavior                                   | 3.30E-03 |
|                                            |          | neuron projection                                | 1.25E-04 |
|                                            |          | chemical homeostasis                             | 1.53E-02 |

**Table S5. GO term enrichment of Class 1 genes, H3K36me3 enriched genes, H3K4me3 enriched genes, and and genes with differential H3K27Ac peaks.**

(a) & (b) GO terms assigned to genes falling under the Class 1 epigenetic profile for H3K27Ac and H3K4me3, respectively. (c) GO terms assigned to genes falling under the Class 5 epigenetic profile for H3K36me3. (d) GO terms assigned to genes with higher H3K4me3 peaks in HD or non -disease cells, respectively. GO terms and false discovery rate adjusted p values were found using DAVID Functional Annotation Clustering tool. The top GO term from each annotation cluster is reported. (e) Enriched (increased acetylation/peak height) genes in HD show categories related to muscle development, function, and cytoskeleton; while non-disease-enriched genes show categories related to neuronal development and function.

### **Supplementary Note: Consortium Groups**

Departments of Biological Chemistry, Psychiatry and Human Behavior, Neurobiology and Behavior, UCI MIND and Sue and Bill Gross Stem Cell Center, University of California, Irvine, Irvine, California USA.

**Ryan G. Lim, Lisa L. Salazar, Alvin R. King, Jennifer T. Stocksdales, Delaram Sharifabad, Alice L. Lau, Jack C. Reidling, Sara T. Winokur, Malcolm S. Casale, Leslie M. Thompson**

Department of Biomedical Sciences, Faculty of Medicine and Health Sciences, University of Barcelona, Barcelona; August Pi i Sunyer Biomedical Research Institute (IDIBAPS), Casanova 143, 08036 Barcelona, Spain and Networked Biomedical Research Centre for Neurodegenerative Disorders (CIBERNED), Spain.

**Mónica Pardo, A. Gerardo García Díaz-Barriga, Marco Straccia, Phil Sanders, Jordi Alberch, Josep M. Canals**

Gladstone Institutes and the Taube/Koret Center of Neurodegenerative Disease Research, Roddenberry Stem Cell Research Program, Departments of Neurology and Physiology, University of California, and Cliff Anderson-Bergman Sandia National Laboratories, 7011 East Avenue, Livermore, California USA.

**Julia A. Kaye, Mariah Dunlap, Lisa Jo, Hanna May, Elliot Mount, Kelly Haston, Steven Finkbeiner**

Computational and Systems Biology Graduate Program, Massachusetts Institute of Technology, Center for Cancer Research, Department of Biological Engineering and/or Department of Biology, Massachusetts Institute of Technology, Cambridge, Massachusetts USA.

**Amanda J. Kedaigle, Theresa A. Gipson, Ferah Yildirim, Christopher W. Ng, Pamela Milani, David E. Housman, Ernest Fraenkel**

School of Biomedical Sciences, Sir Martin Evans Building, Museum Avenue, Cardiff University, Cardiff, CF10 3AX, UK

**Nicholas D. Allen, Paul J. Kemp**

Center for Human Genetic Research, Simches Research Building, 185 Cambridge Street, Massachusetts General Hospital, Boston, Massachusetts USA.

**Ranjit Singh Atwal, Marta Biagioli, James F. Gusella, Marcy E. MacDonald**

Division of Neurobiology, Department of Psychiatry, Departments of Neurology, Neuroscience and Pharmacology and Program in Cellular and Molecular Medicine, Johns Hopkins University School of Medicine, Baltimore, Maryland USA.

**Sergey S. Akimov, Nicolas Arbez, Jacqueline Stewart, Christopher A. Ross**

F.M Kirby Neurobiology Center, Boston Children's Hospital, Harvard Medical School (HMS), Boston, Massachusetts USA.

**Daniel K. Wilton, Beth Stevens**

The Board of Governors Regenerative Medicine Institute and Department of Biomedical Sciences; Cedars-Sinai Medical Center; Los Angeles, California USA.

**Virginia B. Mattis, Colton M. Tom, Loren Ornelas, Anais Sahabian, Lindsay Lenaeus, Berhan Mandefro, Dhruv Sareen, Clive N. Svendsen**
